# Supplementary material for: Towards more drug-like proteomimetics: two-faced, synthetic α-helix mimetics based on a purine scaffold
Source: Royal Society of Chemistry journal article supplement (doi:10.1039/c5ob00478k), 2015-01-01
Supplement: c5ob00478k1.pdf [file c5ob00478k1.pdf]

## **Towards more drug-like proteomimetics: Two-faced, synthetic $\alpha$ -helix mimetics based on a purine scaffold**

M. E. Lanning,<sup>a</sup> P. T. Wilder,<sup>b,c</sup> H. Bailey,<sup>d</sup> B. Drennen,<sup>a</sup> M. Cavalier,<sup>b,c</sup> L. Chen,<sup>a</sup> J. L. Yap,<sup>a</sup> Mithun Raje<sup>a</sup> and S. Fletcher<sup>\*a,c</sup>

<sup>a</sup>Department of Pharmaceutical Sciences, University of Maryland School of Pharmacy, 20 N. Pine St., Baltimore, MD 21201, USA; <sup>b</sup>Department of Biochemistry, University of Maryland School of Medicine, 22 S. Greene St., Baltimore, MD 21201, USA; <sup>c</sup>University of Maryland Greenebaum Cancer Center, 22 S. Greene St., Baltimore, MD 21201, USA; <sup>d</sup>Bryn Mawr School, 109 W. Melrose Ave., Baltimore, MD 21210, USA.

### **Supporting Information**

## Chemistry

**General.** Unless otherwise stated, all reactions were performed under an inert atmosphere ( $N_2$ ). Reagents and solvents were ACS grade, and purchased from Sigma-Aldrich, Alfa Aesar, Oakwood and TCI America. Anhydrous solvents were used as provided from Sigma-Aldrich. Reactions were monitored by thin-layer chromatography (TLC), visualizing with a UV lamp and/or  $KMnO_4$  stain. Flash column chromatography was performed with silica gel 60 Å (70-230 mesh, Merck).  $^1H$  and  $^{13}C$  NMR spectra were recorded on a Varian INOVA 400 MHz NMR spectrometer at 25 °C. Chemical shifts are reported in parts per million (ppm). Data for  $^1H$  NMR are reported thus: chemical shift ( $\delta$  ppm) (multiplicity, coupling constant (Hz), integration), where multiplicities are: s = singlet, d = doublet, t = triplet, m = multiplet. The residual solvent peak was used as an internal reference:  $CDCl_3$  ( $\delta_H$  7.26;  $\delta_C$  77.21) and  $d_6$ -DMSO ( $\delta_H$  2.50;  $\delta_C$  39.51). Mass spectra were obtained on an Electrospray TOF (ESI-TOF) mass spectrometer (Bruker AmaZon X). All final molecules were deemed to be >95% pure by reversed-phased HPLC using a Waters 1525 analytical/preparative HPLC fitted with a C18 reversed-phase column (Atlantis T3: 4.6 mm x 150 mm) according to the following conditions with solvents (A)  $H_2O/0.1\%$  TFA, (B)  $CH_3CN-H_2O$ , 9:1 with 0.1% TFA at 1 ml  $min^{-1}$ : (I) a gradient of 50% A to 100% B over 22 min; (II) an isocratic gradient of 100% B over 22 min. Data are presented as retention time ( $t_R$  (min)), purity (%), condition (I or II).

**General Procedure A: Mitsunobu reaction at N9 position.** *tert*-Butyl (6-chloro-9H-purin-2-yl)carbamate<sup>1</sup> (**2**; 1 eq) was dissolved in THF (0.07 M) at room temperature (RT). The requisite alcohol (1.1 eq) and  $PPh_3$  (1.1 eq). Upon complete dissolution, DIAD (1.1 eq) was added dropwise. The reaction mixture was stirred for 1 h at RT, by which time TLC indicated the reaction was complete (Hex/EtOAc, 1:3). The reaction mixture was concentrated to dryness. Some  $Ph_3P=O$  was triturated from the reaction mixture with  $Et_2O$ . The supernatant was dry-loaded onto silica gel, then purified by flash column chromatography, eluting with Hex/EtOAc, 1:3, to provide the  $N^9$ -alkylated product.

**General Procedure B: Mitsunobu reaction at N2 position.** The appropriate  $N^9$ -alkylated product (**3**; 1 eq) was dissolved in THF (0.07 M) at 35 °C, followed by the requisite alcohol (1.1 eq) and  $PPh_3$  (1.1 eq). As soon as the reaction mixture became homogeneous, DIAD (2.5 eq) was added dropwise. The reaction mixture was allowed to stir at 35 °C overnight. The next day, TLC indicated the reaction was complete (Hex/EtOAc, 2:3). The reaction mixture was concentrated to dryness. Some  $Ph_3P=O$  was triturated from the reaction mixture with  $Et_2O$ . The supernatant was dry-loaded onto silica gel, then purified by flash column chromatography, eluting with Hex/EtOAc, 2:3, to provide the  $N^2$ -alkylated product.

**General Procedure C: Nucleophilic aromatic substitution at C6 position.** The appropriate  $N^2, N^9$ -dialkylated purine (**4**; 1 eq) was dissolved in *i*-PrOH (0.1 M). Glycine (5 eq) and  $K_2CO_3$  (5 eq) were added, then the reaction mixture was heated at reflux for 3 d, by which time TLC indicated the reaction was complete ( $CH_2Cl_2/MeOH/AcOH$ , 92:7:1). The solvent was removed *in vacuo*. The residue was partitioned between water and  $Et_2O$ . The ethereal layer was collected, then the aqueous layer was extracted once again with  $Et_2O$ . The aqueous layer was carefully acidified to pH 5 with 0.1 M HCl, then diluted with sat.  $NaH_2PO_4$ . The product was extracted into EtOAc (x4). The pooled EtOAc extractions were washed with water, brine, dried ( $Na_2SO_4$ ), filtered and concentrated to yield a crude residue that was purified by silica gel flash column chromatography (eluent:  $CH_2Cl_2/MeOH/AcOH$ , 92:7:1) to furnish the final molecules **5**.

*tert-Butyl (6-chloro-9-isopropyl-9H-purin-2-yl)carbamate (3a)*. General procedure A on a 2 mmol scale with isopropanol. White solid (468 mg, 75%); <sup>1</sup>H NMR (400 MHz, CDCl<sub>3</sub>): δ 8.04 (s, 1H), 7.56 (s, 1H), 4.92-4.85 (q, *J* = 6.8 Hz, 1H), 1.60 (d, *J* = 6.4 Hz, 6H), 1.53 (s, 9H); <sup>13</sup>C NMR (100 MHz, CDCl<sub>3</sub>): δ 152.4, 152.1, 151.0, 150.2, 141.9, 127.9, 81.5, 47.5, 28.2, 22.6; Calcd (M<sup>+</sup>): 311.8, Found: 312.0 (M<sup>+</sup>).

*tert-Butyl (9-benzyl-6-chloro-9H-purin-2-yl)carbamate (3b)*. General procedure A on a 2 mmol scale with benzyl alcohol. White solid (575 mg, 80%); <sup>1</sup>H NMR (400 MHz, CDCl<sub>3</sub>): δ 7.87 (s, 1H), 7.80 (s, 1H), 7.30-7.28 (m, 5H), 5.35 (s, 2H), 1.51 (s, 9H); <sup>13</sup>C NMR (100 MHz, CDCl<sub>3</sub>): δ 152.9, 152.6, 151.2, 150.3, 143.9, 134.6, 129.1, 128.7, 128.2, 127.6, 81.6, 47.7, 28.2; Calcd (M<sup>+</sup>): 359.1, Found: 360.2 ([M+H]<sup>+</sup>).

*(2-((tert-Butoxycarbonyl)amino)-9-isobutyl-9H-purin-6-yl)glycine (3c)*. General procedure A on a 2 mmol scale with isobutanol. White solid (540 mg, 83%); <sup>1</sup>H NMR (400 MHz, CDCl<sub>3</sub>): δ 7.91 (s, 1H), 7.46 (s, 1H), 4.02 (d, *J* = 6.8 Hz, 2H), 2.30-2.23 (m, 1H), 1.53 (s, 9H), 0.94 (d, *J* = 7.2 Hz, 6H); <sup>13</sup>C NMR (100 MHz, CDCl<sub>3</sub>): δ 153.1, 152.3, 151.2, 150.2, 144.5, 127.8, 81.6, 51.4, 28.9, 28.2, 19.9; Calcd (M<sup>+</sup>): 325.1, Found: 326.2 ([M+H]<sup>+</sup>).

*tert-Butyl (6-chloro-9-(naphthalen-1-ylmethyl)-9H-purin-2-yl)carbamate (3d)*. General procedure A on a 2 mmol scale with naphthalene-1-methanol. White solid (795 mg, 97%); <sup>1</sup>H NMR (400 MHz, *d*<sub>6</sub>-DMSO): δ 10.38 (s, 1H), 8.56 (s, 1H), 8.41 (d, *J* = 7.6 Hz, 1H), 7.97 (d, *J* = 8 Hz, 1H), 7.91 (d, *J* = 8.4 Hz, 1H), 7.63-7.55 (m, 2H), 7.46 (t, *J* = 7.8 Hz, 1H), 7.33 (d, *J* = 7.2 Hz, 1H), 5.89 (s, 2H), 1.45 (s, 9H); <sup>13</sup>C NMR (100 MHz, *d*<sub>6</sub>-DMSO): □ 153.4, 153.0, 151.3, 149.6, 146.6, 133.7, 132.1, 130.7, 129.1, 127.4, 127.1, 126.7, 126.5, 126.0, 123.8, 80.1, 79.6, 44.9, 28.4; Calcd (M<sup>+</sup>): 409.1, Found: 410.2 ([M+H]<sup>+</sup>).

*tert-Butyl (6-chloro-9-isopropyl-9H-purin-2-yl)(isopropyl)carbamate (4aa)*. General procedure B on a 1 mmol scale with **3a** and isopropanol. Pale yellow gum, contaminated with DIAD-H<sub>2</sub> (350 mg, 99%); <sup>1</sup>H NMR (400 MHz, CDCl<sub>3</sub>): δ 8.12 (s, 1H), 4.88-4.82 (m, 1H), 4.63-4.57 (m, 1H), 1.64 (d, *J* = 7.2 Hz, 6H), 1.42 (s, 9H), 1.30 (d, *J* = 7.2 Hz, 6H); <sup>13</sup>C NMR (100 MHz, CDCl<sub>3</sub>): δ 153.9, 153.8, 151.9, 150.3, 142.9, 129.5, 80.8, 49.9, 48.1, 28.2, 22.4, 20.9; Calcd (M<sup>+</sup>): 353.1, Found: 354.1 ([M+H]<sup>+</sup>).

*tert-Butyl (9-benzyl-6-chloro-9H-purin-2-yl)(sec-butyl)carbamate (4ba)*. General procedure B on a 1 mmol scale with **3b** and *sec*-butanol. Pale yellow gum, contaminated with DIAD-H<sub>2</sub> (362 mg, 87%); <sup>1</sup>H NMR (400 MHz, CDCl<sub>3</sub>): δ 8.04 (s, 1H), 7.33-7.26 (m, 5H), 5.38 (s, 2H), 4.39-4.34 (m, 1H), 1.83-1.76 (m, 1H), 1.59-1.52 (m, 1H), 1.42 (s, 9H), 1.27 (d, *J* = 7.2 Hz, 3H), 0.94 (t, *J* = 8 Hz, 3H); <sup>13</sup>C NMR (100 MHz, CDCl<sub>3</sub>): δ 154.8, 154.2, 152.4, 150.4, 144.7, 134.6, 129.2, 128.8, 127.9, 80.9, 56.0, 47.9, 28.3, 28.2, 21.9, 18.9, 11.4; Calcd (M<sup>+</sup>): 415.2, Found: 416.2 ([M+H]<sup>+</sup>).

*tert-Butyl benzyl(6-chloro-9-isobutyl-9H-purin-2-yl)carbamate (4cb)*. General procedure B on a 1 mmol scale with **3c** and benzyl alcohol. Pale yellow gum (345 mg, 83%); <sup>1</sup>H NMR (400 MHz, CDCl<sub>3</sub>): δ 7.93 (s, 1H), 7.34 (d, *J* = 8.0 Hz, 2H), 7.24 (d, *J* = 7.2 Hz, 2H), 7.16 (t, *J* = 7.4 Hz, 1H), 5.15 (s, 2H), 3.94 (d, *J* = 8 Hz, 2H), 2.20-2.14 (m, 1H), 1.45 (s, 9H), 0.89 (d, *J* = 6.4 Hz, 6H); <sup>13</sup>C NMR (100 MHz, CDCl<sub>3</sub>): δ 155.1, 153.9, 152.3, 150.3, 144.9, 138.5, 128.2, 127.9, 127.5, 126.9, 81.9, 51.5 (2), 28.9, 28.1, 19.9; Calcd (M<sup>+</sup>): 415.2, Found: 416.3 ([M+H]<sup>+</sup>).

*tert*-Butyl benzyl(6-chloro-9-(naphthalen-1-ylmethyl)-9H-purin-2-yl)carbamate (**4db**). General procedure B on a 1 mmol scale with **3e** and benzyl alcohol. Pale yellow gum (356 mg, 87%): <sup>1</sup>H NMR (400 MHz, *d*<sub>6</sub>-DMSO): δ 8.73 (s, 1H), 8.29-8.27 (m, 1H), 7.98-7.96 (m, 1H), 7.91 (d, *J* = 8.4 Hz, 1H), 7.57-7.53 (m, 2H), 7.43 (t, *J* = 7.8 Hz, 1H), 7.29 (d, *J* = 7.2 Hz, 1H), 7.20-7.17 (m, 5H), 5.93 (s, 2H), 5.01 (s, 2H), 1.32 (s, 9H); <sup>13</sup>C NMR (100 MHz, *d*<sub>6</sub>-DMSO): δ 154.8, 153.8, 153.0, 149.1, 147.8, 138.6, 133.8, 131.7, 130.7, 129.2, 128.6, 128.0, 127.6, 127.4, 127.2, 126.9, 126.6, 125.9, 123.5, 81.6, 51.3, 45.2, 28.0; Calcd (M<sup>+</sup>): 499.2, Found: 500.2 ([M+H]<sup>+</sup>); *t*<sub>R</sub> = 9.64 min (99.7%, II).

*tert*-Butyl (6-chloro-9-(naphthalen-1-ylmethyl)-9H-purin-2-yl)(isobutyl)carbamate (**4dc**). General procedure B on a 1 mmol scale with **3d** and isobutanol. Pale yellow gum, contaminated with DIAD-H<sub>2</sub> after flash column chromatography. The material was used directly in the next step without further attempts of purification.

(2-((*tert*-Butoxycarbonyl)(isopropyl)amino)-9-isopropyl-9H-purin-6-yl)glycine (**5aa**). General procedure B on a 0.5 mmol scale with **4aa**. White solid (143 mg, 73%): <sup>1</sup>H NMR (400 MHz, *d*<sub>6</sub>-DMSO): δ 12.53 (s, 1H), 8.25 (s, 1H), 7.97 (s, 1H), 4.71-4.66 (m, 1H), 4.38-4.34 (m, 1H), 4.06 (d, *J* = 4.8 Hz, 2H), 1.53 (d, *J* = 6 Hz, 6H), 1.34 (s, 9H), 1.15 (d, *J* = 6.4 Hz, 6H); <sup>13</sup>C NMR (100 MHz, CDCl<sub>3</sub>): δ 172.1, 154.8, 154.1, 153.6, 149.8, 139.9, 118.3, 79.3, 48.7, 47.1, 42.1, 28.4, 22.5, 21.1; mp = 178–182 °C; Calcd (M<sup>+</sup>): 392.2, Found: 393.1 ([M+H]<sup>+</sup>); *t*<sub>R</sub> = 12.4 min (100%, I).

(9-Benzyl-2-((*tert*-butoxycarbonyl)(*sec*-butyl)amino)-9H-purin-6-yl)glycine (**5ba**). General procedure B on a 0.5 mmol scale with **4ba**. White solid (150 mg, 66%): <sup>1</sup>H NMR (400 MHz, CDCl<sub>3</sub>): δ 12.52 (s, 1H), 8.26 (s, 1H), 8.01 (s, 1H), 7.29-7.24 (m, 5H), 5.31 (s, 2H), 4.04-3.99 (m, 3H), 1.59-1.52 (m, 1H), 1.40-1.33 (m, 1H), 1.27 (s, 9H), 1.08 (d, *J* = 6.4 Hz, 3H), 0.85 (t, *J* = 7.2 Hz, 3H); <sup>13</sup>C NMR (100 MHz, CDCl<sub>3</sub>): δ 171.9, 154.8, 154.5, 154.3, 150.2, 141.8, 137.5, 129.0, 128.2, 128.0, 117.7, 79.3, 54.7, 46.7, 42.0, 28.3, 28.1, 19.3, 11.7; mp = 197–200 °C; Calcd (M<sup>-</sup>): 454.2, Found: 353.3 ([M-Boc-H]<sup>-</sup>); *t*<sub>R</sub> = 13.5 min (100%, I).

(2-(Benzyl(*tert*-butoxycarbonyl)amino)-9-isobutyl-9H-purin-6-yl)glycine (**5cb**). General procedure B on a 0.5 mmol scale with **4cb**. White solid (177 mg, 78%): <sup>1</sup>H NMR (400 MHz, *d*<sub>6</sub>-DMSO): δ 12.55 (s, 1H), 8.09 (s, 1H), 8.00 (s, 1H), 7.32-7.18 (m, 5H), 4.92 (s, 2H), 4.07 (d, *J* = 5.6 Hz, 2H), 3.89 (d, *J* = 7.6 Hz, 2H), 2.19-2.15 (m, 1H), 1.38 (s, 9H), 0.83 (d, *J* = 6.8 Hz, 6H); <sup>13</sup>C NMR (100 MHz, *d*<sub>6</sub>-DMSO): δ 172.1, 155.2, 154.6, 150.4, 141.9 (2), 139.5, 128.4, 127.8, 127.0, 117.0, 80.3, 51.3, 50.5, 42.0, 28.7, 28.3, 20.1; mp = 168–171 °C; Calcd (M<sup>-</sup>): 454.2, Found: 353.3 ([M-Boc-H]<sup>-</sup>); *t*<sub>R</sub> = 12.3 min (98.8%, I).

(2-(Benzyl(*tert*-butoxycarbonyl)amino)-9-(naphthalen-1-ylmethyl)-9H-purin-6-yl)glycine (**5db**). General procedure B on a 0.5 mmol scale with **4db**. White solid (162 mg, 74%): <sup>1</sup>H NMR (400 MHz, *d*<sub>6</sub>-DMSO): δ 12.58 (s, 1H), 8.31 (d, *J* = 7.2 Hz, 1H), 8.19 (s, 1H), 8.12 (s, 1H), 7.97 (d, *J* = 8 Hz, 1H), 7.90 (d, *J* = 8 Hz, 1H), 7.57-7.54 (m, 2H), 7.45 (t, *J* = 7.8 Hz, 1H), 7.29 (d, *J* = 7.2 Hz, 2H), 7.24-7.18 (m, 4H), 5.81 (s, 2H), 4.96 (s, 2H), 4.10 (d, *J* = 5.6 Hz, 2H), 1.29 (s, 9H); <sup>13</sup>C NMR (100 MHz, *d*<sub>6</sub>-DMSO): δ 172.0, 155.5, 154.6, 154.5, 150.3, 141.6, 139.5, 133.8, 132.9, 130.8, 129.1, 128.9, 128.5, 127.7, 127.1, 127.0, 126.5, 126.3, 125.9, 123.6, 116.8, 80.4, 51.2, 44.2, 42.1, 28.2; mp = 194–197 °C (dec.); Calcd (M<sup>-</sup>): 538.23, Found: 437.3 ([M-Boc-H]<sup>-</sup>); *t*<sub>R</sub> = 16.3 min (100%, I).

(2-((*tert*-Butoxycarbonyl)(*isobutyl*)amino)-9-(*naphthalen-1-ylmethyl*)-9*H*-purin-6-yl)glycine (**5dc**). General procedure B on a 0.5 mmol scale with **4dc**. White solid (174 mg, 69%): <sup>1</sup>H NMR (400 MHz, *d*<sub>6</sub>-DMSO): δ 12.51 (s, 1H), 8.32-8.30 (m, 1H), 8.18 (s, 1H), 8.06 (s, 1H), 7.98-7.95 (m, 1H), 7.90 (d, *J* = 7.6 Hz, 1H), 7.57-7.54 (m, 2H), 7.45 (t, *J* = 7.8 Hz, 1H), 7.26 (d, *J* = 6.8 Hz, 1H), 5.81 (s, 2H), 4.06 (d, *J* = 8 Hz, 2H), 3.53 (d, *J* = 6.8 Hz, 2H), 1.81-1.77 (m, 1H), 1.28 (s, 9H), 0.77 (d, *J* = 6 Hz, 6H); <sup>13</sup>C NMR (100 MHz, *d*<sub>6</sub>-DMSO): δ 171.9, 155.9, 154.7, 151.2, 150.3, 141.6, 133.8, 132.9, 130.8, 129.1, 128.9, 127.1, 126.5, 126.4, 125.9, 123.6 (2), 79.7, 54.9, 44.2, 42.1, 28.2 (2), 20.3; mp = 170–173 °C (dec.); Calcd (M<sup>+</sup>): 504.3, Found: 403.5 ([M-Boc-H]<sup>+</sup>); *t*<sub>R</sub> = 15.7 min (96.9%, I).

(2-(*Benzylamino*)-9-(*naphthalen-1-ylmethyl*)-9*H*-purin-6-yl)glycine (**6db**). (2-(*Benzyl*(*tert*-butoxycarbonyl)amino)-9-(*naphthalen-1-ylmethyl*)-9*H*-purin-6-yl)glycine (**5db**; 30 mg, 0.056 mmol, 1 eq) was dissolved in anhydrous CH<sub>2</sub>Cl<sub>2</sub> (1 mL), then TFA (1 mL) was added. The reaction mixture was stirred for 1 h at RT, by which time TLC confirmed the reaction was complete. All solvent was removed *in vacuo*, and the residual TFA was azeotroped with CHCl<sub>3</sub> (x3). The residue was suspended in ether, then collected by vacuum filtration to yield the title compound as an off-white solid (25 mg, 92%): <sup>1</sup>H NMR (400 MHz, *d*<sub>6</sub>-DMSO): δ 8.25 (d, *J* = 8 Hz, 1H), 7.98 (d, *J* = 8.8 Hz, 2H), 7.90 (d, *J* = 7.6 Hz, 1H), 7.58–7.53 (m, 2H), 7.43 (t, *J* = 7.6 Hz, 1H), 7.32 (d, *J* = 6.8 Hz, 3H), 7.27-7.19 (m, 4H), 5.72 (s, 2H), 4.46-4.08 (m, 6H); <sup>13</sup>C NMR (100 MHz, *d*<sub>6</sub>-DMSO): δ 171.2, 159.9, 159.6, 159.2, 156.7, 142.2, 140.2, 138.9, 133.8, 131.7, 130.7, 129.1, 128.6, 128.0, 127.2, 126.6, 126.0, 123.4, 117.7, 114.8, 45.5, 44.9, 42.5; *t*<sub>R</sub> = 14.9 min (100%, I).

(2-*Chloro*-9*H*-purin-6-yl)glycine (**7**). 2,6-Dichloropurine (350 mg, 1.85 mmol, 1 eq) was dissolved in anhydrous DMSO (6 mL). Glycine *tert*-butyl ester.HCl (310 mg, 1.85 mmol, 1 eq) and DIPEA (967 μL, 5.55 mmol, 3 eq) were added to the reaction mixture, which was subsequently heated at 80 °C for 16 h. TLC confirmed the reaction was complete. Upon cooling to RT, ice-cold water was added. The resulting beige precipitate was collected by vacuum filtration, washing with copious ice-cold water, then dried under vacuum at 50 °C for 4 h to afford *tert*-butyl (2-chloro-9*H*-purin-6-yl)glycinate as a beige solid (509 mg, 97%): <sup>1</sup>H NMR (400 MHz, *d*<sub>6</sub>-DMSO, 60 °C): δ 12.85 (s, 1H), 8.07 (s, 2H), 4.02 (s, 2H), 1.37 (s, 9H); <sup>13</sup>C NMR (100MHz, *d*<sub>6</sub>-DMSO, 60 °C): δ 168.5, 154.3, 152.2, 139.8, 117.2, 80.3, 42.6, 27.5. *tert*-Butyl (2-chloro-9*H*-purin-6-yl)glycinate (100 mg, 0.352 mmol) was suspended in anhydrous CH<sub>2</sub>Cl<sub>2</sub> (3.5 mL), then TFA (3.5 mL) was added, which afforded complete dissolution of the *tert*-butyl ester. After stirring for 3 h at RT, TLC confirmed the reaction was complete. All solvent was removed *in vacuo*, and the residual TFA was azeotroped with CHCl<sub>3</sub> (x3). The residue was suspended in ether, then collected by vacuum filtration to yield the title compound as an off-white solid (76 mg, 95%): <sup>1</sup>H NMR (400 MHz, *d*<sub>6</sub>-DMSO): δ <sup>1</sup>H NMR (400 MHz, *d*<sub>6</sub>-DMSO, 60 °C): δ 8.07–7.97 (m, 2H), 4.10 (s, 2H); <sup>13</sup>C NMR (100MHz, *d*<sub>6</sub>-DMSO, 60 °C): δ 171.5, 155.0, 153.2, 140.6, 118.0, 42.4. *t*<sub>R</sub> = 1.87 min (100%, II).

## Biology

**Materials.** All chemical reagents were ACS grade or higher unless otherwise indicated. All buffers were passed through Chelex-100 (Bio-Rad, Hercules, CA) to remove trace metals. The D<sub>2</sub>O, D<sub>6</sub>-DMSO, and <sup>15</sup>NH<sub>4</sub>Cl were purchased from Cambridge Isotope Laboratories, Inc. (Andover, MA). All other chemicals were purchased from Sigma-Aldrich (St. Louis, MO).

**Proteins.** The pET30a expression vector (EMD Millipore, Billerica, MA) was used to express N-terminal His6-tagged Hdm2 N-terminal domain residues 1 to 155 (Hdm2<sup>1-115</sup>) in HMS174 (DE3) cells (EMD Millipore). Briefly, the <sup>15</sup>N-labeled protein was purified (>98% final) from inclusion bodies by initial solubilizing in 6 M guanidium chloride in PBS, pH 7.4, with 0.5 mM TCEP. The denatured protein was refolded by rapid dilution into 6-fold volume of PBS, pH 7.4, with 0.5 mM TCEP. The folded protein was then captured on Q-sepharose resin and eluted with a linear gradient of 0 to 2 M NaCl in 10 mM Na<sub>3</sub>PO<sub>4</sub>, pH 7.0, and 1 mM DTT. Then (NH<sub>4</sub>)<sub>2</sub>SO<sub>4</sub> powder was added to reach a final concentration of 0.8 M by slow addition over 30 minutes and stirring for an additional 30 minutes. The sample was added to a butyl sepharose column preconditioned with 0.8 M (NH<sub>4</sub>)<sub>2</sub>SO<sub>4</sub>, 10 mM Na<sub>3</sub>PO<sub>4</sub>, pH 7.0, and 1 mM DTT buffer. The sample was eluted with a linear gradient of decreasing (NH<sub>4</sub>)<sub>2</sub>SO<sub>4</sub> to a final buffer of 10 mM Na<sub>3</sub>PO<sub>4</sub>, pH 7.0, and 1 mM DTT. The protein was concentrated using a 10,000 MWCO centrifugal filter concentrator (EMD Millipore) and the concentrate stored frozen in the same buffer. The pLM302 expression vector was constructed to produce His6-MBP (maltose binding protein) tagged recombinant human Mcl-1 residues 172 to 327 (Mcl-1<sup>172-327</sup>) in HMS174 (DE3) cells (EMD Millipore) using either LB or minimal media supplemented with <sup>15</sup>NH<sub>4</sub>Cl to produce unlabeled or <sup>15</sup>N-labeled Mcl-1, respectively. The tagged protein was initially purified from the crude cell lysate by IMAC chromatography (GE Healthcare Life Sciences), and after dialysis to remove the imidazole the affinity tag was cleaved using PreScission Protease (GE Healthcare Life Sciences). A Sephacryl S-200 size exclusion column was used as a final purification step before the protein was concentrated with a 10,000 MWCO centrifugal filter concentrator (EMD Millipore). The concentrations of the proteins were determined using the Bio-Rad Protein Assay (Bio-Rad Inc., Hercules, CA) using BSA of a known concentration as the standard (Pierce). The purity of the protein was confirmed using SDS-PAGE analysis and NMR HSQC experiments were done to confirm the protein was properly folded (data not shown).

**Peptides.** A 6-aminohexanoic acid linker was conjugated to the N-terminus of the Bak BH3 peptide (GQVGRQLAIGDDINR), capped with fluorescein (on the amino group of the linker), and the peptide was amidated on the C-terminus to give FITC-Ahx-GQVGRQLAIGDDINR-CONH<sub>2</sub>, hereafter referred to as "FITC-Bak<sup>71-89</sup>" (synthesized by Neo BioScience in >95% purity). The p53 peptides were derived from the N-terminal human p53, residues 15-29 (SQETFSDLWKLLPEN) with an amidated C-terminus with either an acetylated (p53<sup>15-29</sup>) or TAMRA-labeled (TAMRA-p53<sup>15-29</sup>) N-terminus. Each peptide was soluble and stored in H<sub>2</sub>O at pH 7. The concentration of the stock solution of unlabeled peptides were determined by quantitative amino acid analysis (Biosynthesis Inc., Lewisville, TX), the concentration of FITC peptides was determined at pH 8.0 using the extinction coefficient for amide-linked FITC,  $\epsilon_{494} = 68,000 \text{ cm}^{-1}\text{M}^{-1}$ , and the concentration of the TAMRA peptide was determined using the extinction coefficient for TAMRA,  $\epsilon_{547} = 65,000 \text{ cm}^{-1}\text{M}^{-1}$ . All peptides were synthesized using solid-state peptide synthesis and their purity was determined to be >95% by high pressure liquid chromatography and mass spectrometry.

**Fluorescence anisotropy experiments.** Fluorescence anisotropy experiments were conducted using a PHERAstar FS (BMG Labtech) multimode microplate reader equipped with two PMTs for simultaneous measurements of the perpendicular and parallel fluorescence emission. In addition, the absolute anisotropy measurements were made on a Cary Eclipse Fluorescence Spectrophotometer (Agilent Technologies) equipped with automated polarizers.

The fluorescence anisotropy assays were performed in black polypropylene 384-well microplate (Costar) with a final volume of 20  $\mu$ L. Initially the affinity ( $K_d$ ) of the FITC-Bak<sup>71-89</sup> peptide was determined by titrating either Mcl-1<sup>172-327</sup> or Bcl-xL<sup>2-212</sup>, into 10 nM FITC-Bak<sup>71-89</sup> peptide in 20 mM HEPES, pH 6.8, 50 mM NaCl, 3 mM DTT, 0.01% Triton X-100 and 5% DMSO at room temperature while monitoring the perpendicular and parallel fluorescence emission with a 485 nm excitation and 520 nm emission filters. The fluorescence anisotropy competition assay was performed using 100 nM Mcl-1<sup>172-327</sup> or 15 nM Bcl-xL<sup>2-212</sup> in the same buffer (10 nM FITC-Bak<sup>71-89</sup> peptide in 20 mM HEPES, pH 6.8, 50 mM NaCl, 3 mM DTT, 0.01% Triton X-100 and 5% DMSO) with varying concentrations of either unlabeled peptide or experimental compounds.

Similarly, the affinity of TAMRA-p53<sup>15-29</sup> was determined by the titration of Hdm2<sup>21-115</sup> into 10 nM TAMRA-p53<sup>15-29</sup> peptide in PBS with 0.01% Triton X-100 and 5% DMSO at room temperature with a 544 nm excitation and 590 nm emission filters. The fluorescence polarization assays (FPCA) were performed using 10  $\mu$ M Hdm2<sup>21-115</sup> in the same buffer (PBS with 0.01% Triton X-100 and 5% DMSO) with varying concentrations of unlabeled p53<sup>15-29</sup> peptide or experimental compounds.

The initial binding affinities ( $K_d$ ) were determined by fitting the binding data to the Dose Response function in the Origin software (OriginLab, Northampton, MA):  $y = A_1 + (A_2 - A_1) / (1 + 10^{(\text{LOG}x_0 - x)p})$  such that dynamic range = abs ( $A_1 - A_2$ ) and the  $K_d = 10^{\text{LOG}x_0}$ . The  $IC_{50}$  in the competition assays were determined by fitting the binding data to the One Site Competition function in the Origin software (OriginLab, Northampton, MA):  $y = A_2 + (A_1 - A_2) / (1 + 10^{(x - \text{log}x_0)})$  such that dynamic range = abs ( $A_1 - A_2$ ) and the  $IC_{50} = 10^{(\text{log}x_0)}$ . It has been shown that each of the proteins used here binds a single target peptide (1:1 stoichiometry) at the concentrations used in the competition assays.<sup>2-4</sup> Therefore, we are able to use an equation derived by Nikolovska-Coleska et al.<sup>5</sup> to calculate the  $K_d$  from the  $IC_{50}$  from the anisotropy competition assays. The affinity ( $K_d$ ) of TAMRA-p53<sup>15-29</sup> for Hdm2<sup>21-115</sup> was determined to be  $6.51 \pm 0.44 \mu\text{M}$ , and the affinities of FITC-Bak<sup>71-89</sup> for Mcl-1<sup>172-327</sup> and Bcl-xL<sup>2-212</sup> were determined to be  $41.96 \pm 2.78 \text{ nM}$  and  $6.67 \pm 0.05 \text{ nM}$ , respectively, in the assay conditions used.

The quality and suitability of the fluorescence anisotropy competition assays were evaluated using the Z-factor developed by Zhang et al.<sup>6</sup> The Z-factor =  $1 - (3SD_b + 3SD_f) / (|\mu_b - \mu_f|)$  where  $\mu_b$  and  $\mu_f$  are the mean anisotropy (mA) values of the bound and free probe, respectively, and  $SD_b$  and  $SD_f$  are the standard deviations of those values for bound and free probe, respectively. The Z-factor can be any value  $\leq 1$ , with a value of 1 being an ideal assay,  $\geq 0.5$  but  $< 1.0$  being an excellent assay, and a value  $< 0.5$  being unacceptable for our application.

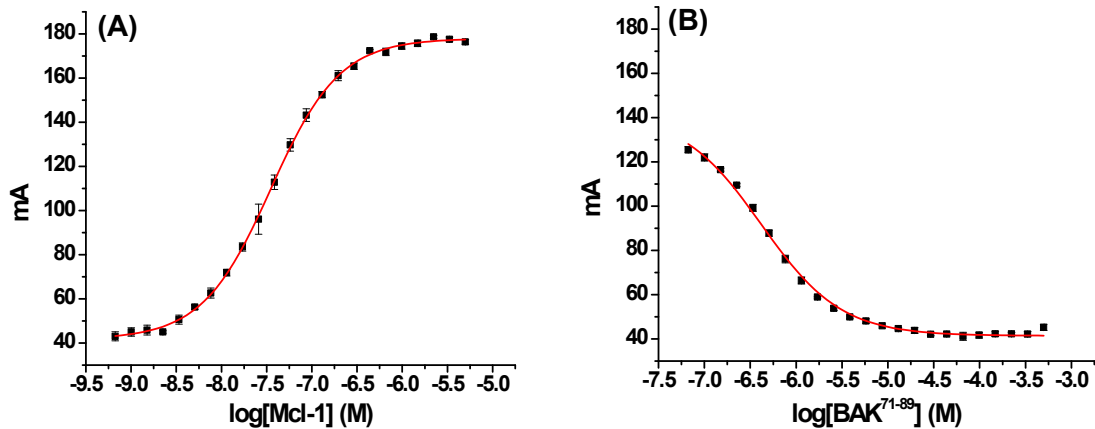

**Figure S1.** (A) Titration of Mcl-1<sup>172-327</sup> into 10 nM FITC-BAK<sup>71-89</sup> gives a  $K_D$  of  $41.96 \pm 2.78$  nM with the free FITC-BAK peptide having an absolute anisotropy value of  $41.4 \pm 1.4$  mA (this is the same as Mcl-1 assay b/c same peptide, buffer and conditions) and the Mcl-1 bound peptide  $178.0 \pm 1.4$  mA. (B) The FITC-BAK<sup>71-89</sup> was competed off Mcl-1<sup>172-327</sup> with unlabeled BAK<sup>71-89</sup> peptide with an  $IC_{50}$  of  $418.19 \pm 37.77$  nM giving a calculated  $K_D$  of  $101.84 \pm 12.37$  nM. For this competition assay 60 nM Mcl-1<sup>172-327</sup> was used and gives an excellent Z-factor of 0.79 with a dynamic range of  $86.96 \pm 0.32$  mA.

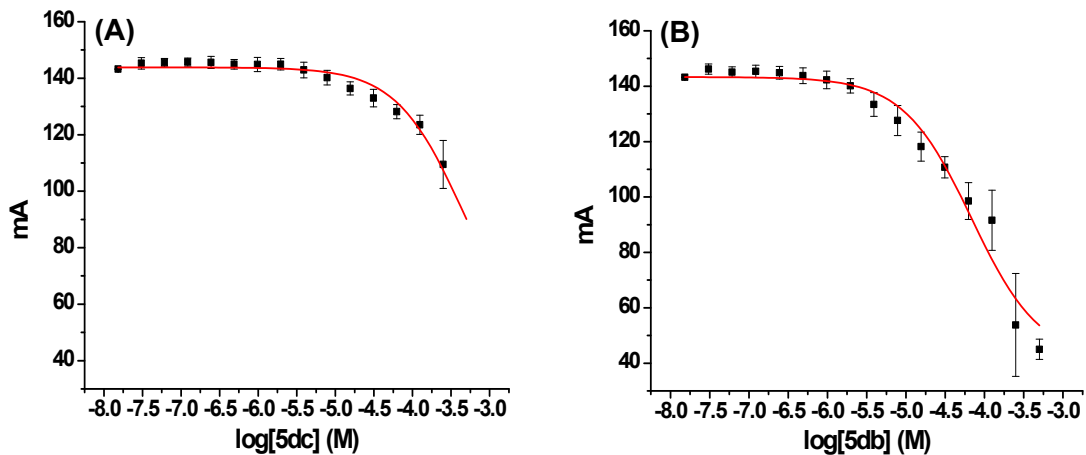

**Figure S2.** The FITC-BAK<sup>71-89</sup> was competed off Mcl-1<sup>172-327</sup> with (A) 5dc or (B) 5db giving an estimated  $IC_{50}$  of  $471.54 \pm 123.12$   $\mu$ M and  $IC_{50}$   $72.17 \pm 21.21$   $\mu$ M, respectively. For all the competition assays used to test compounds, 100 nM Mcl-1<sup>172-327</sup> was used giving an excellent Z-factor of 0.82 with a dynamic range of  $101.8 \pm 2.85$  mA.



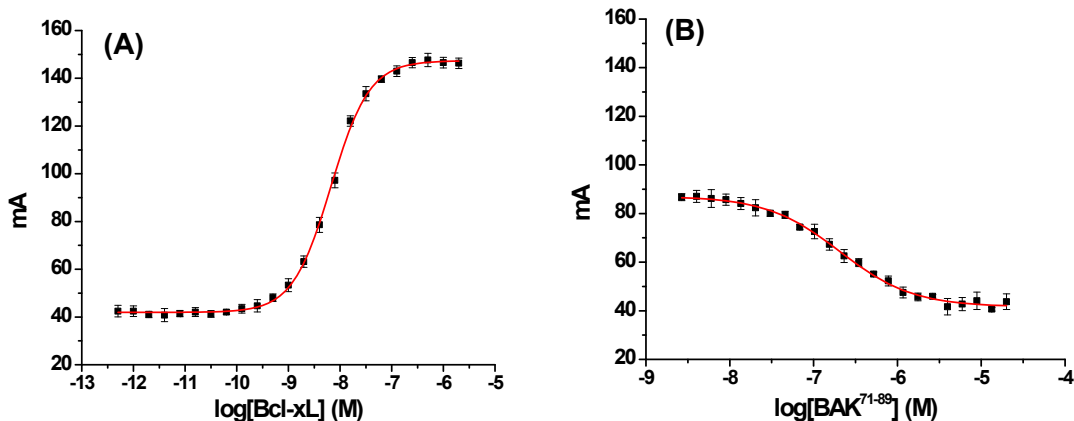

**Figure S3.** (A) Titration of Bcl-xL<sup>2-212</sup> into 10 nM FITC-BAK<sup>71-89</sup> gives a  $K_D$  of  $6.67 \pm 0.05$  nM with the free FITC-BAK peptide having an absolute anisotropy value of  $41.4 \pm 1.4$  mA (this is the same for MCL-1 assay because it is the same peptide, buffer and conditions) and the Bcl-xL<sup>2-212</sup> bound peptide  $147.1 \pm 1.4$  mA. (B) The FITC-BAK<sup>71-89</sup> was competed off Bcl-xL<sup>2-212</sup> with unlabeled BAK<sup>71-89</sup> peptide with an  $IC_{50}$  of  $206.28 \pm 14.77$  nM giving a calculated  $K_d$  of  $57.17 \pm 4.30$  nM. For this competition assay 15 nM Bcl-xL<sup>2-212</sup> was used giving an excellent Z-factor of 0.91 with a dynamic range of  $45.8 \pm 0.6$  mA.

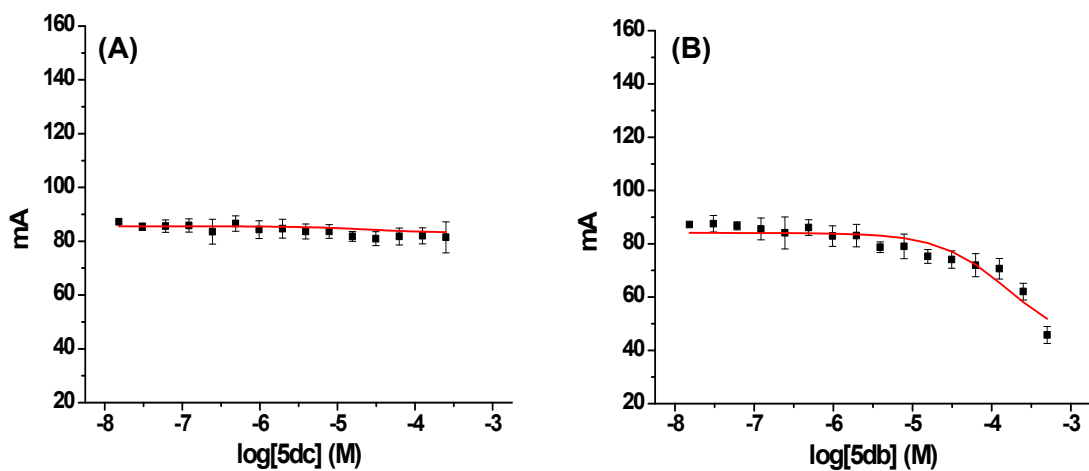

**Figure S4.** (A) **5dc** does not significantly compete with FITC-BAK<sup>71-89</sup> binding to Bcl-xL<sup>2-212</sup>. (B) **5db** weakly competed with an estimated  $IC_{50}$  of  $201.82 \pm 51.53$   $\mu$ M. For all the competition assays used to test compounds, 15 nM Bcl-xL<sup>2-212</sup> was used giving an excellent Z-factor of 0.91 with a dynamic range of  $45.8 \pm 0.6$  mA.

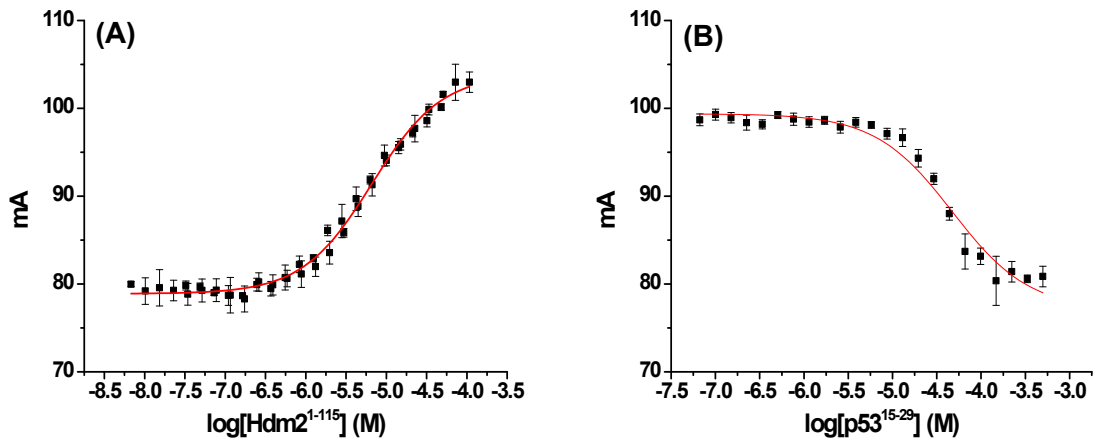

**Figure S5.** (A) Titration of Hdm2<sup>1-115</sup> into 10 nM TAMRA-p53<sup>15-29</sup> gives a  $K_d$  of  $6.51 \pm 0.44 \mu\text{M}$  with the free TAMRA-p53<sup>15-29</sup> peptide having an absolute anisotropy value of  $80.1 \pm 1.3 \text{ mA}$  and the Hdm2<sup>1-115</sup> bound peptide  $102.9 \pm 1.5 \text{ mA}$ . (B) The TAMRA-p53<sup>15-29</sup> was competed with unlabeled p53<sup>15-29</sup> with an  $\text{IC}_{50}$  of  $49.36 \pm 1.13 \mu\text{M}$  giving a calculated  $K_d$  of  $16.64 \pm 0.44 \mu\text{M}$ . Using  $10 \mu\text{M}$  Hdm2<sup>1-115</sup> for the competition assay gives a good Z-factor of 0.58 and a dynamic range of  $19.57 \pm 0.64 \text{ mA}$ . The same conditions were used to test all compounds but no competition was seen.

## REFERENCES

1. S. Fletcher, V. M. Shahani and P. T. Gunning, *Tetrahedron Lett.*, 2009, **50**, 4258; S. Fletcher, V. M. Shahani, A. J. Lough and P. T. Gunning, *Tetrahedron*, 2010, **66**, 4621.
2. Czabotar PE, Lee EF, Thompson GV, Wardak AZ, Fairlie WD, Colman PM. Mutation to Bax beyond the BH3 domain disrupts interactions with pro-survival proteins and promotes apoptosis. *J Biol Chem*. 2011;286(9):7123-31. PMID: 3044969.
3. Popowicz GM, Czarna A, Holak TA. Structure of the human Mdmx protein bound to the p53 tumor suppressor transactivation domain. *Cell Cycle*. 2008;7(15):2441-3.
4. Sattler M, Liang H, Nettlesheim D, Meadows RP, Harlan JE, Eberstadt M, et al. Structure of Bcl-xL-Bak peptide complex: recognition between regulators of apoptosis. *Science*. 1997;275(5302):983-6.
5. Nikolovska-Coleska Z, Wang R, Fang X, Pan H, Tomita Y, Li P, et al. Development and optimization of a binding assay for the XIAP BIR3 domain using fluorescence polarization. *Anal Biochem*. 2004;332(2):261-73.
6. Zhang JH, Chung TD, Oldenburg KR. A Simple Statistical Parameter for Use in Evaluation and Validation of High Throughput Screening Assays. *J Biomol Screen*. 1999;4(2):67-73.

# Compound 3a <sup>1</sup>H

Data Collected on:  
400mr-vnmrs400  
Archive directory:

Sample directory:

Fidfile: PROTON

Pulse Sequence: PROTON (s2pul)  
Solvent: cdcl3  
Data collected on: Apr 24 2015

Temp. 25.0 C / 298.1 K  
Operator: work

Relax. delay 1.000 sec  
Pulse 79.4 degrees  
Acq. time 1.278 sec  
Width 6410.3 Hz

Single scan  
OBSERVE H1, 399.7512853 MHz  
DATA PROCESSING  
Line broadening 0.5 Hz  
FT size 16384  
Total time 0 min 2 sec

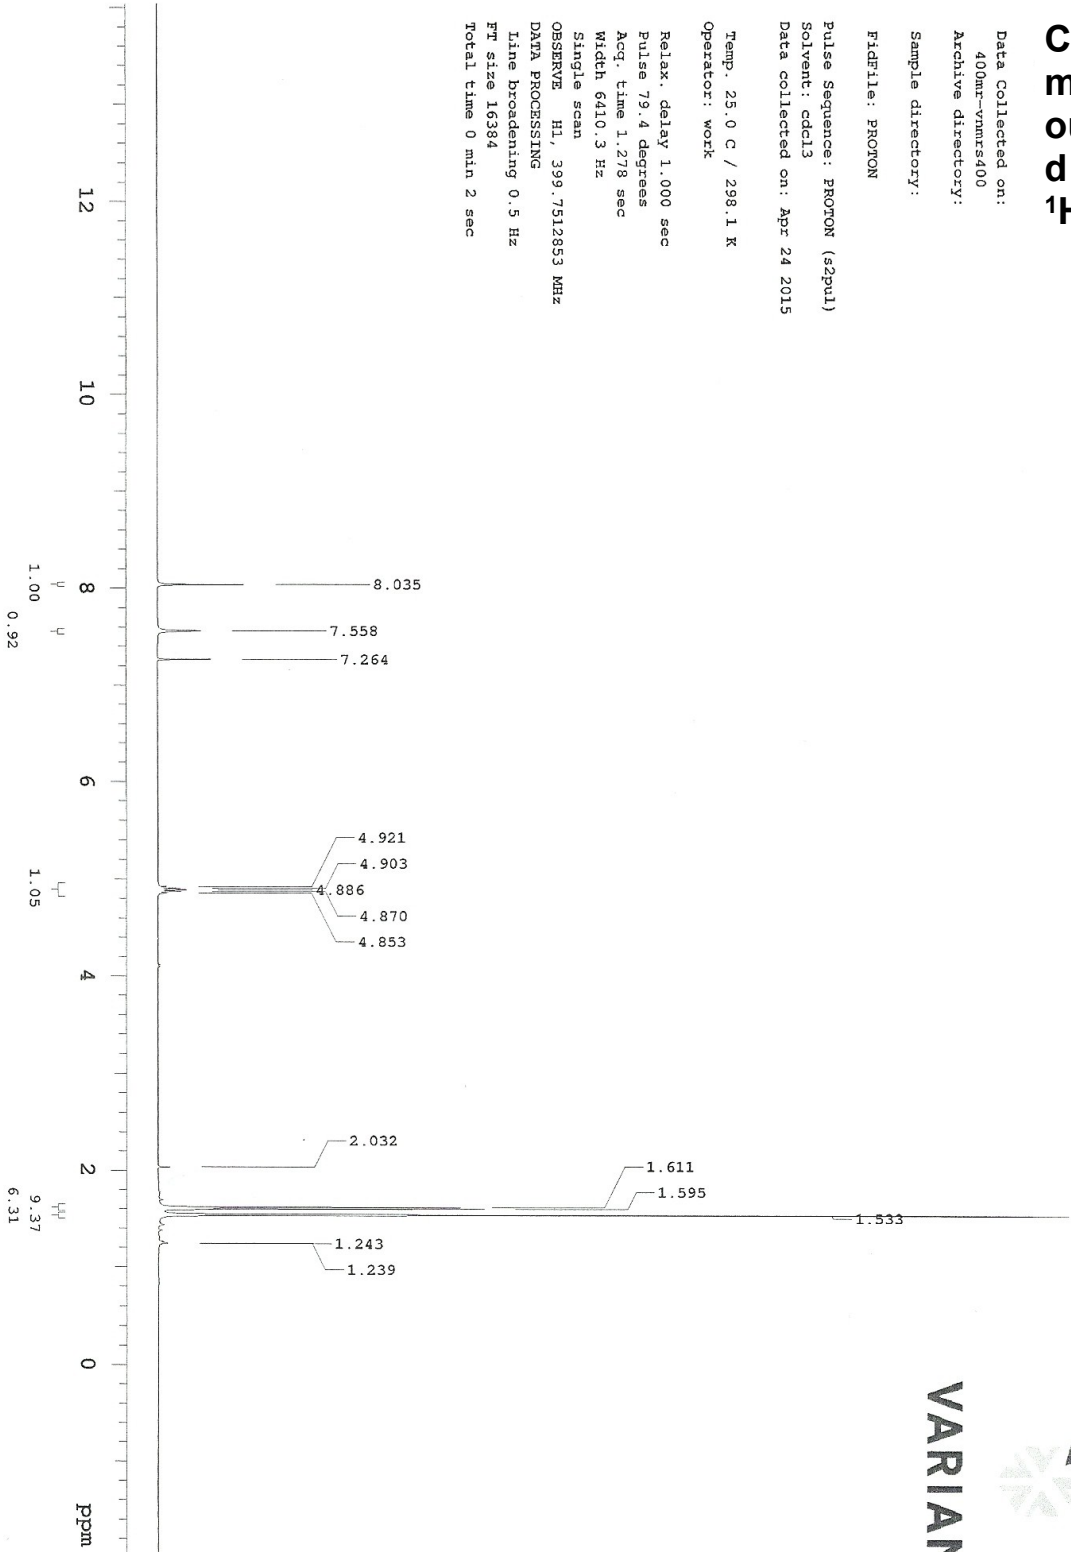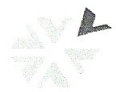

VARIAN

# Compound 3a <sup>13</sup>C

Data Collected on:  
400mr-vnmr400  
Archive directory:

Sample directory:

Fidfile: CARBON

Pulse Sequence: CARBON (s2pul)  
Solvent: cdcl3  
Data collected on: Apr 24 2015

Temp. 25.0 C / 298.1 K  
Operator: work

Relax. delay 1.000 sec  
Pulse 45.0 degrees  
Acq. time 1.285 sec  
Width 25510.2 Hz  
136 repetitions  
OBSERVE C13, 100.5175428 MHz  
DECOUPLE H1, 399.7532925 MHz  
Power 39 dB  
continuously on  
WALTZ-16 modulated  
DATA PROCESSING  
Line broadening 0.5 Hz  
Ft size 65536  
Total time 15 min

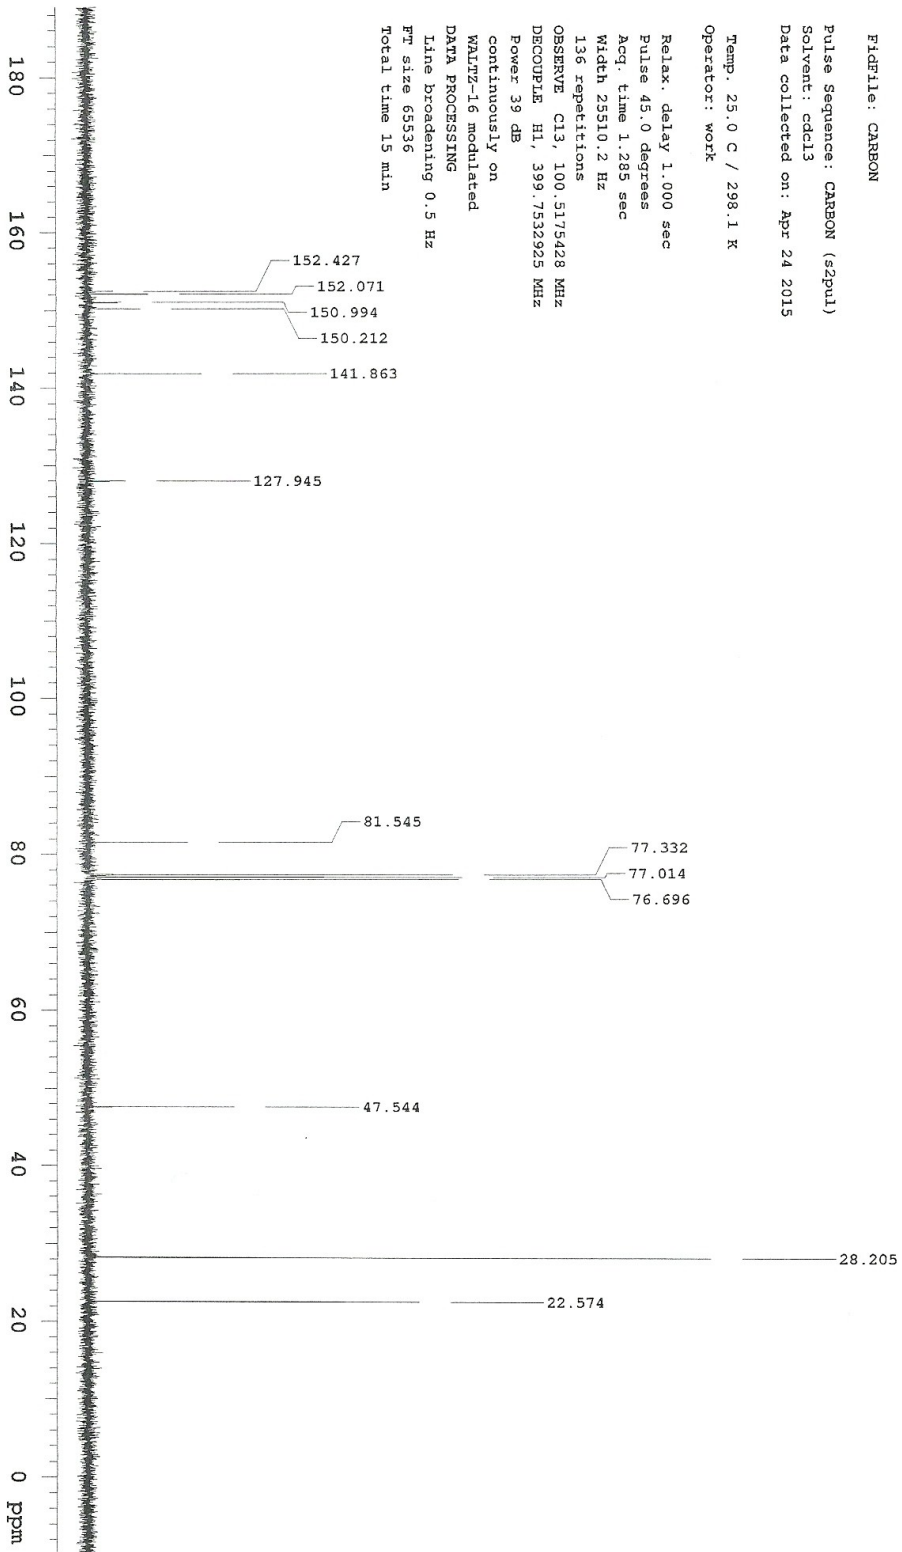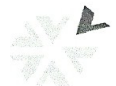

VARIAN

# Compound 4aa <sup>1</sup>H

Data Collected on:

400mr-vnmr400

Archive directory:

Sample directory:

Fidfile: PROTON

Pulse Sequence: PROTON (s2pul)

Solvent: cdcl3

Data collected on: Apr 24 2015

Temp. 25.0 C / 298.1 K

Operator: work

Relax. delay 1.000 sec

Pulse 79.4 degrees

Acq. time 1.278 sec

Width 6410.3 Hz

Single scan

OBSERVE H1, 399.7512953 MHz

DATA PROCESSING

Line broadening 0.5 Hz

FT size 16384

Total time 0 min 2 sec

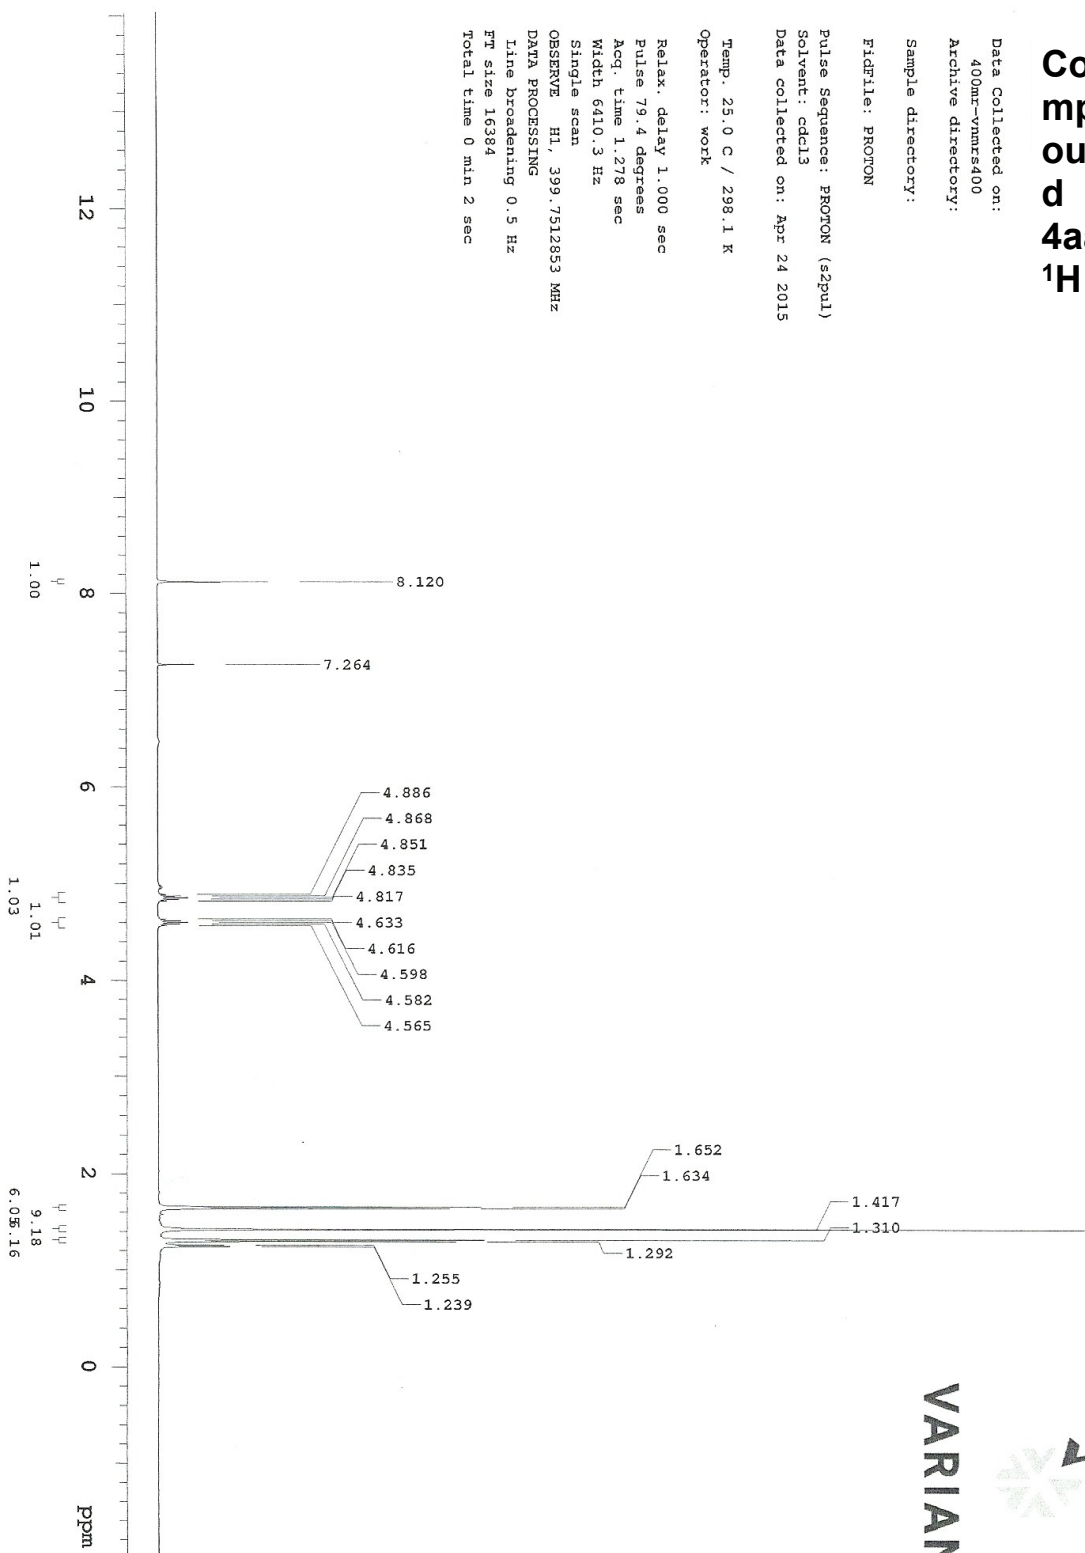

# Compound 4aa <sup>13</sup>C

Data Collected on:  
400m-vnmrs400  
Archive directory:

Sample directory:

File: CARBON

Pulse Sequence: CARBON (s2pul)  
Solvent: cdcl3  
Data collected on: Apr 24 2015

Temp: 25.0 C / 298.1 K  
Operator: work

Relax. delay 1.000 sec  
Pulse 45.0 degrees  
Acq. time 1.285 sec  
Width 25510.2 Hz  
112 repetitions  
OBSERVE C13, 100.5175428 MHz  
DECOUPLE H1, 399.7532925 MHz  
Power 39 dB  
continuously on  
WALTZ-16 modulated  
DATA PROCESSING  
Line broadening 0.5 Hz  
Ft size 65536  
Total time 15 min

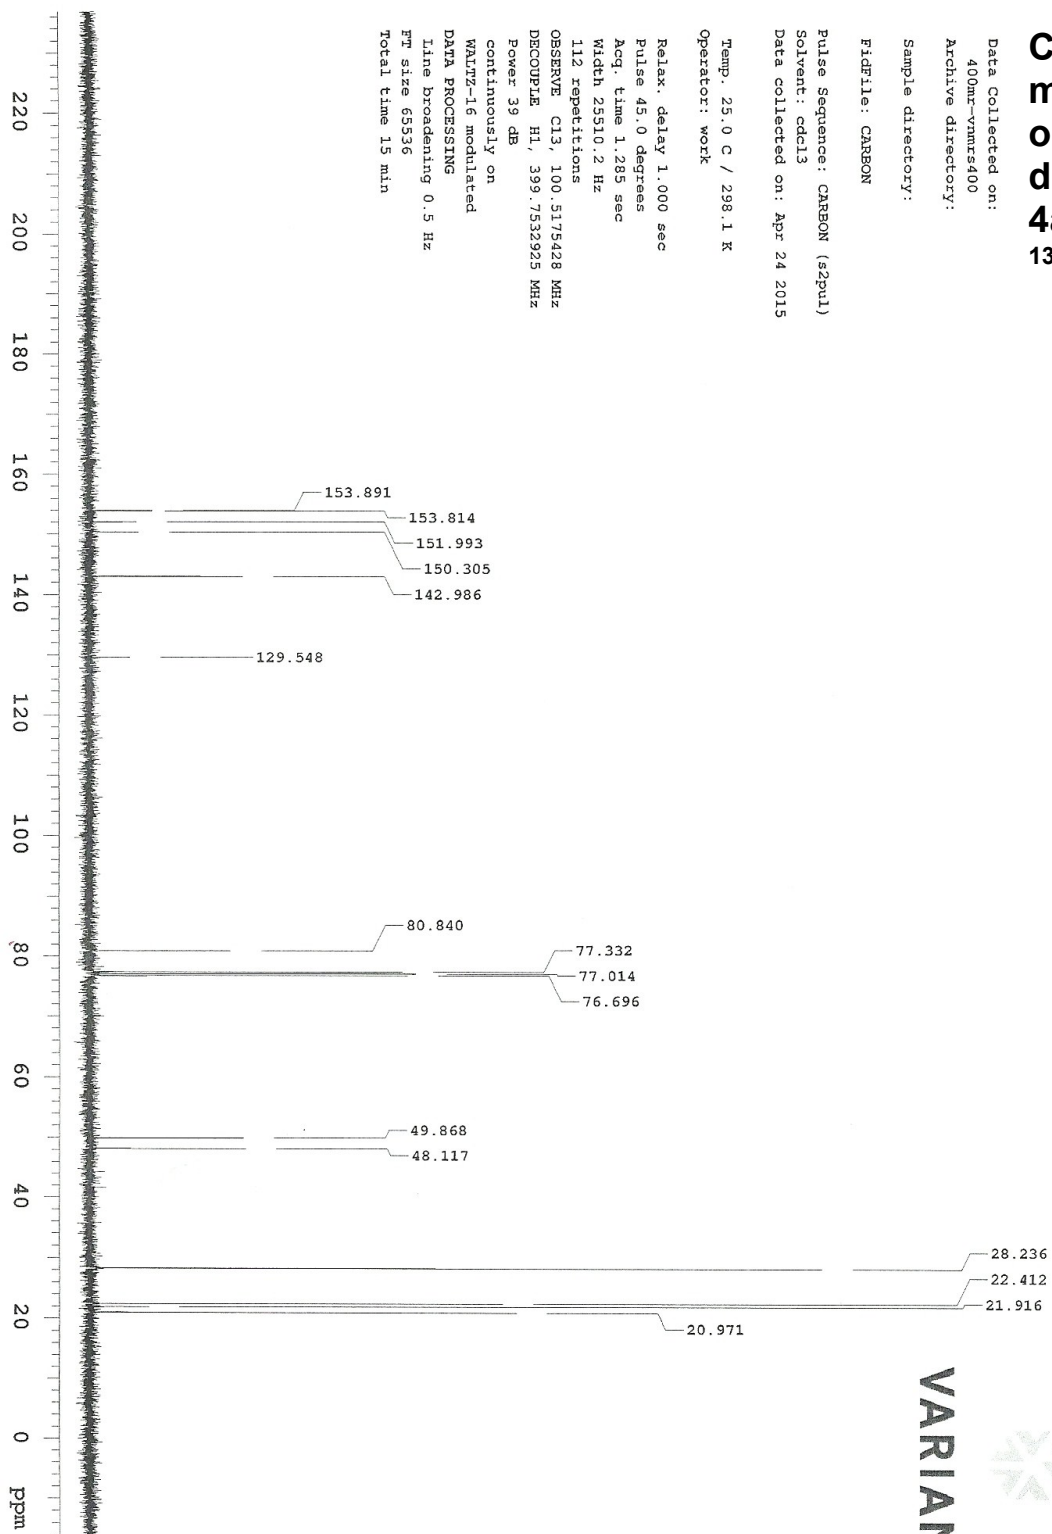

VARIAN

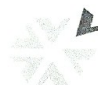

# Compound 5aa <sup>1</sup>H

Data Collected on:  
400mr-vnmr400  
Archive directory:

Sample directory:

FidFile: PROTON

Pulse Sequence: PROTON (s2pu1)  
Solvent: dmsc  
Data collected on: Apr 24 2015

Temp. 25.0 C / 298.1 K  
Operator: work

Relax. delay 5.000 sec  
Pulse 79.4 degrees  
Acq. time 1.278 sec  
Width 6410.3 Hz  
16 repetitions  
OBSERVE H1, 399.7531748 MHz  
DATA PROCESSING  
Line Broadening 0.5 Hz  
F1 size 16384  
Total time 1 min 40 sec

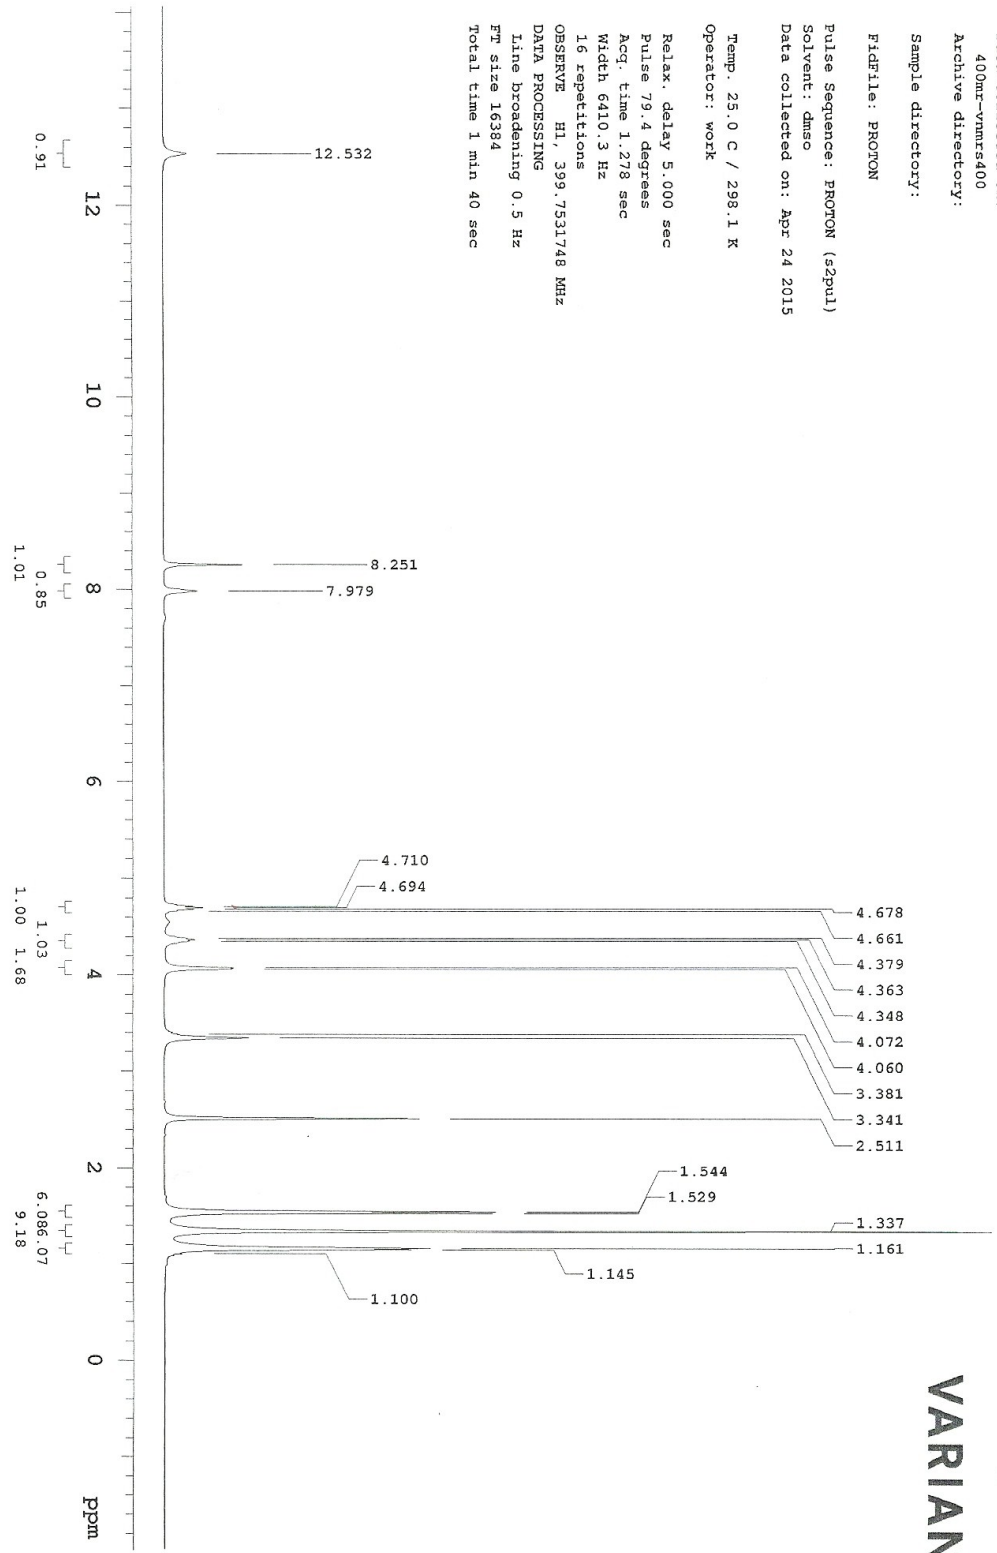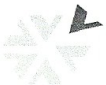

VARIAN



# Compound 5aa <sup>13</sup>C

Data Collected on:  
400mz-vnmr4100  
Archive directory:

Sample directory:

FIDFile: CARBON

Pulse Sequence: CARBON (s2pul1)  
Solvent: dmso  
Data collected on: Apr 24 2015

Temp: 25.0 C / 298.1 K  
Operator: work

Relax. delay 1.000 sec  
Pulse 58.1 degrees  
Acq. time 0.813 sec  
Width 24509.8 Hz  
444 repetitions  
OBSERVE C13, 100.5180202 MHz  
DECOUPLE H1, 399.7551914 MHz  
Power 39 dB  
continuously on  
WALTZ-16 modulated  
DATA PROCESSING  
Line broadening 3.0 Hz  
FT size 32768  
Total time 18 min

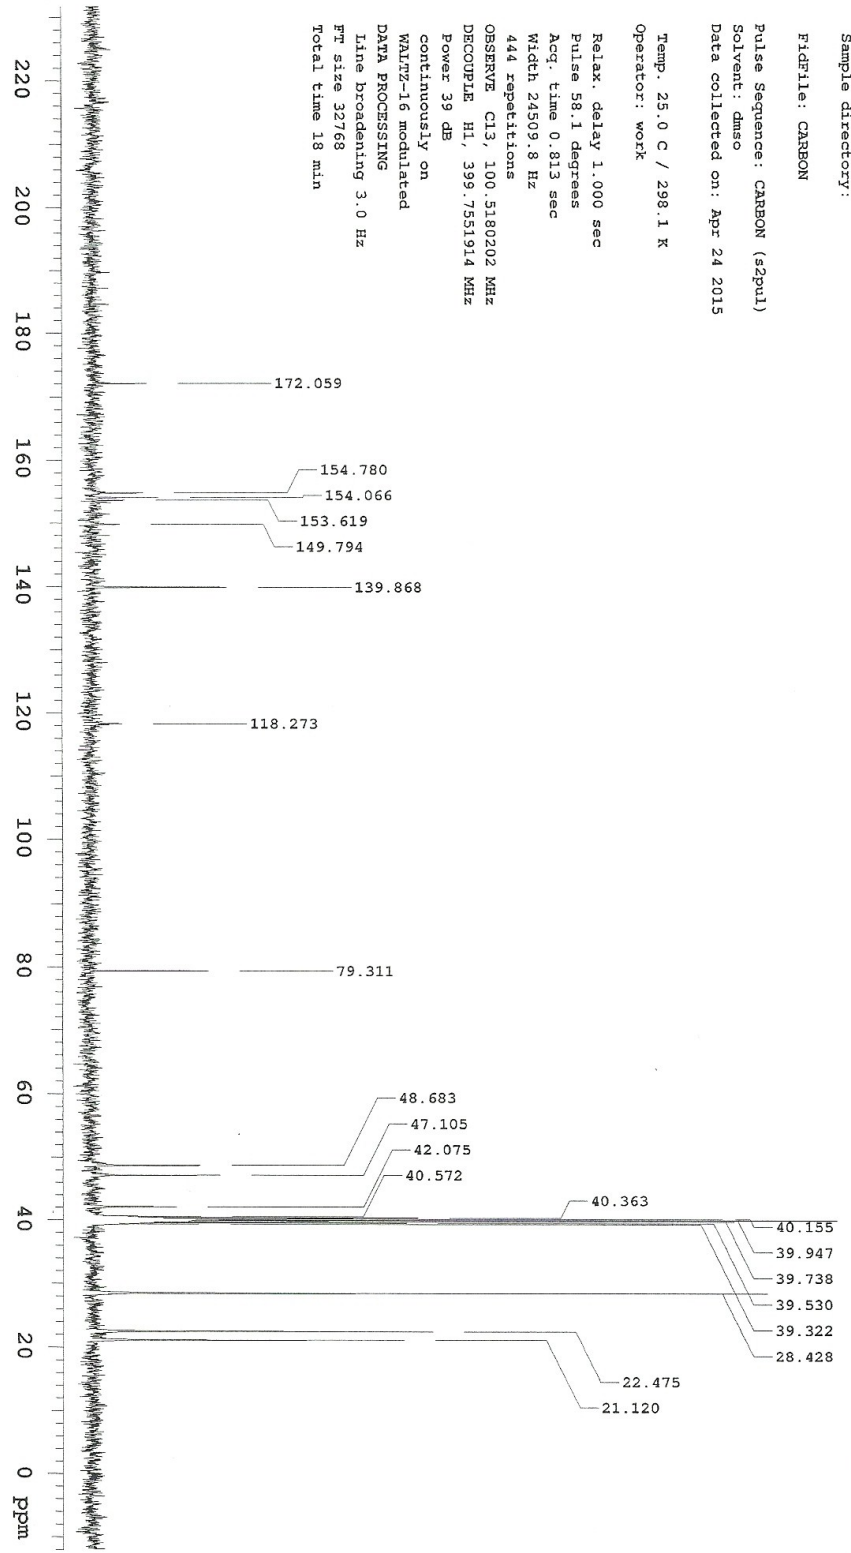

VARIAN

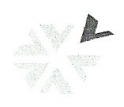

# Compound 3b <sup>1</sup>H

Data Collected on:  
400mr-vnmrs400  
Archive directory:

Sample directory:

File: PROTON

Pulse Sequence: PROTON (s2pu1)  
Solvent: cdcl3  
Data collected on: May 7 2015

Temp. 25.0 C / 298.1 K  
Operator: work

Relax. delay 5.000 sec  
Pulse 79.4 degrees  
Acq. time 1.278 sec  
Width 6410.3 Hz  
32 repetitions  
OBSERVE H1, 399.7512878 MHz  
DATA PROCESSING  
Line broadening 0.5 Hz  
FT size 16384  
Total time 3 min 21 sec

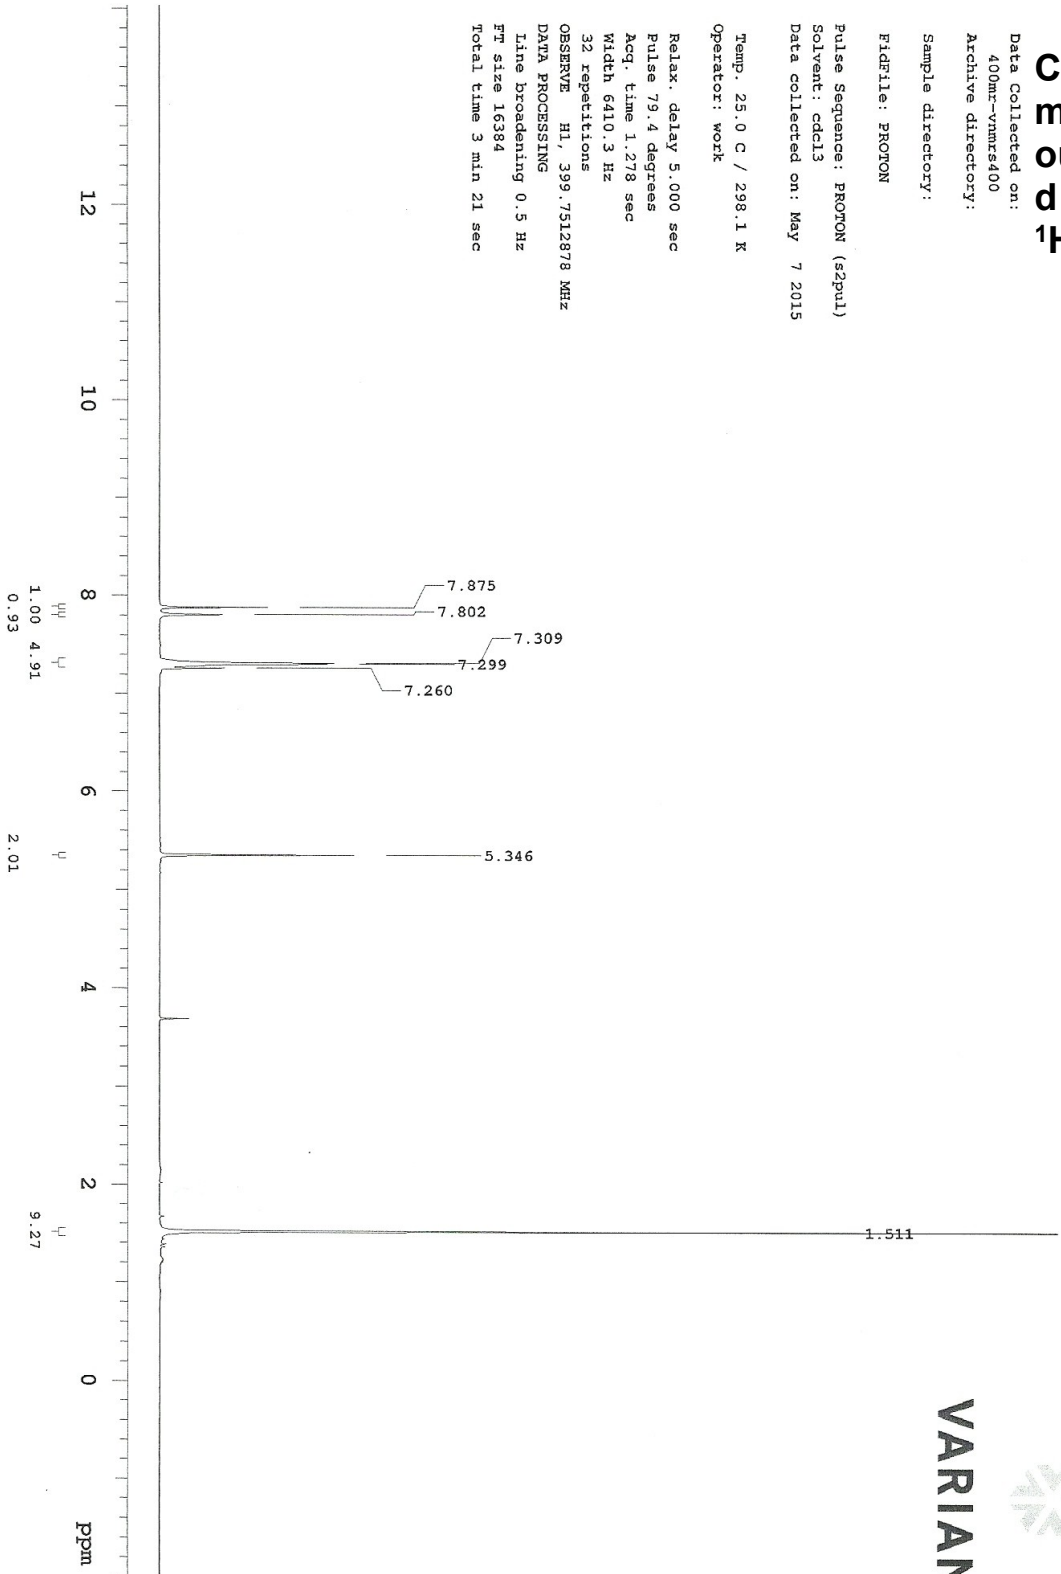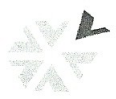

VARIAN

# Compound 3b<sup>13</sup>C

Data Collected on:  
400m-vnmrs400

Archive directory:

Sample directory:

FIDFile: CARBON

Pulse Sequence: CARBON (szpul)

Solvent: cdcl3

Data collected on: May 7 2015

Temp. 25.0 C / 298.1 K

Operator: work

Relax. delay 1.000 sec  
Pulse 58.1 degrees  
Acq. time 0.813 sec  
Width 25510.2 Hz  
168 repetitions  
OBSERVE C13, 100.5175428 MHz  
DECOUPLE H1, 399.7532925 MHz  
Power 39 dB  
continuously on  
WALTZ-16 modulated  
DATA PROCESSING  
Line broadening 3.0 Hz  
Ft size 32768  
Total time 15 min

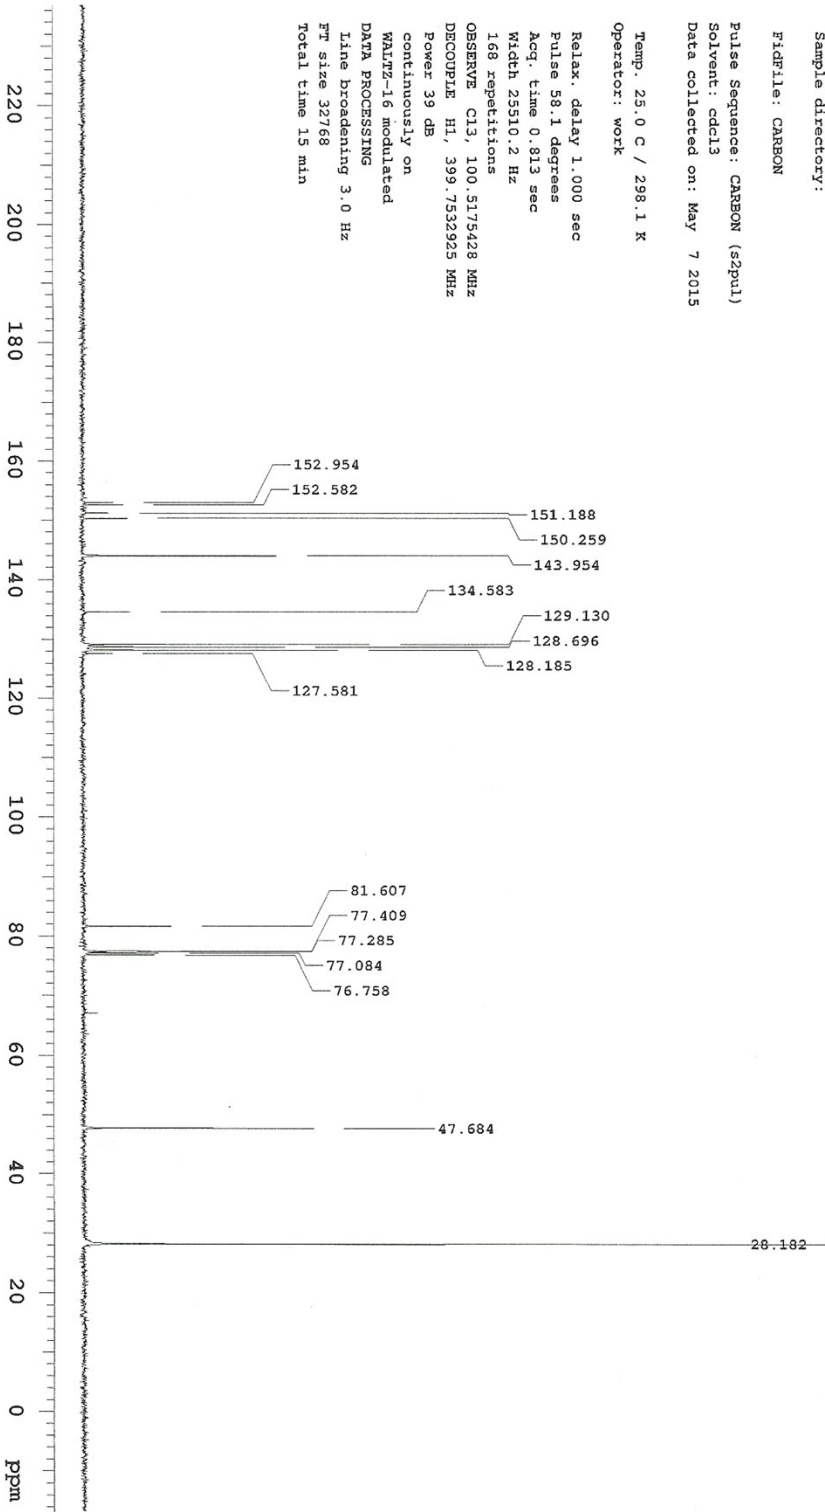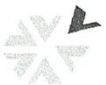

VARIAN

# Compound 4ba <sup>1</sup>H

Data Collected on:  
400mr-vmr400  
Archive directory:

Sample directory:

Filefile: PROTON

Pulse Sequence: PROTON (s2pul)  
Solvent: cdd13  
Data collected on: Jan 9 2015

Temp. 26.0 C / 299.1 K  
Operator: work

Relax. delay 5.000 sec  
Pulse 79.4 degrees  
Acq. time 1.278 sec  
Width 6410.3 Hz  
32 repetitions  
OBSERVE H1, 399.7512870 MHz  
DATA PROCESSING  
Line broadening 0.5 Hz  
FT size 16384  
Total time 3 min 21 sec

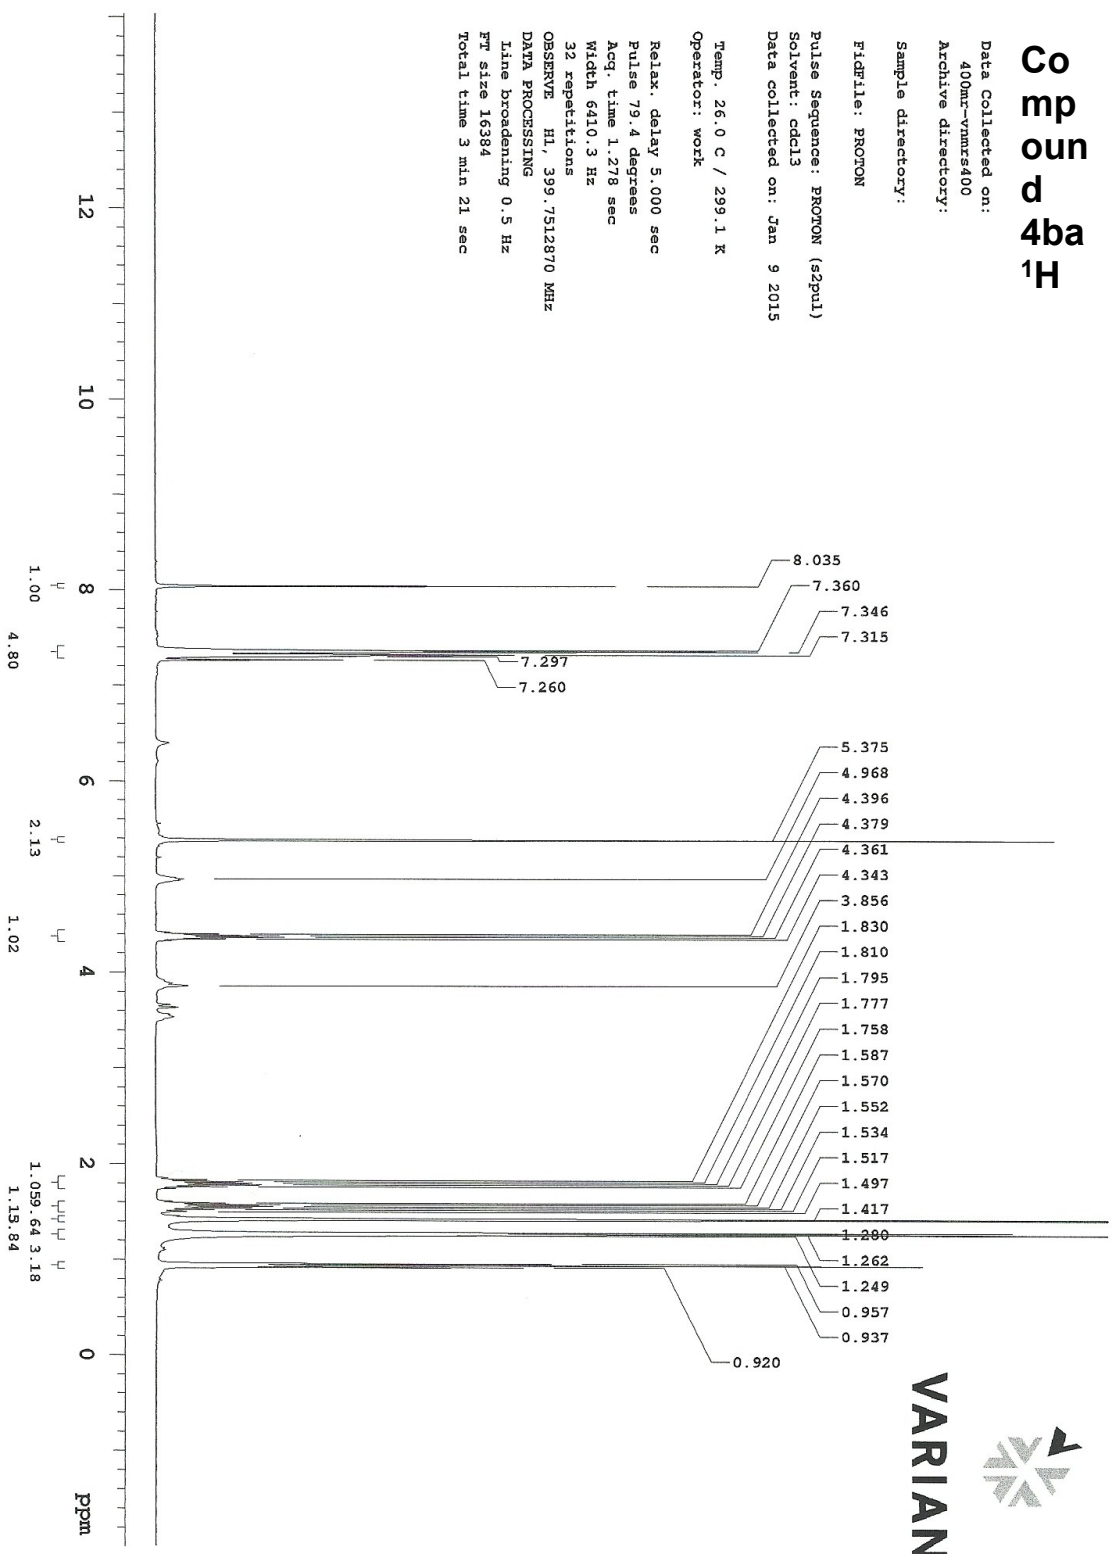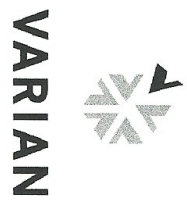

# Compound 4ba <sup>13</sup>C

Data Collected on:  
400mr-vmmr400  
Archive directory:

Sample directory:

FIDFile: CARBON

Pulse Sequence: CARBON (s2pul)  
Solvent: cdcl3  
Data collected on: Jan 9 2015

Temp: 26.0 C / 299.1 K  
Operator: work

Relax. delay 1.000 sec  
Pulse 58.1 degrees  
Acq. time 0.813 sec  
Width 21186.4 Hz  
244 repetitions  
OBSERVE C13, 100.5175428 MHz  
DECOUPLE H1, 399.7532925 MHz  
Power 39 dB  
continuously on  
VAlTZ-16 modulated  
DATA PROCESSING  
Line Broadening 3.0 Hz  
FM size 32768  
Total time 15 min

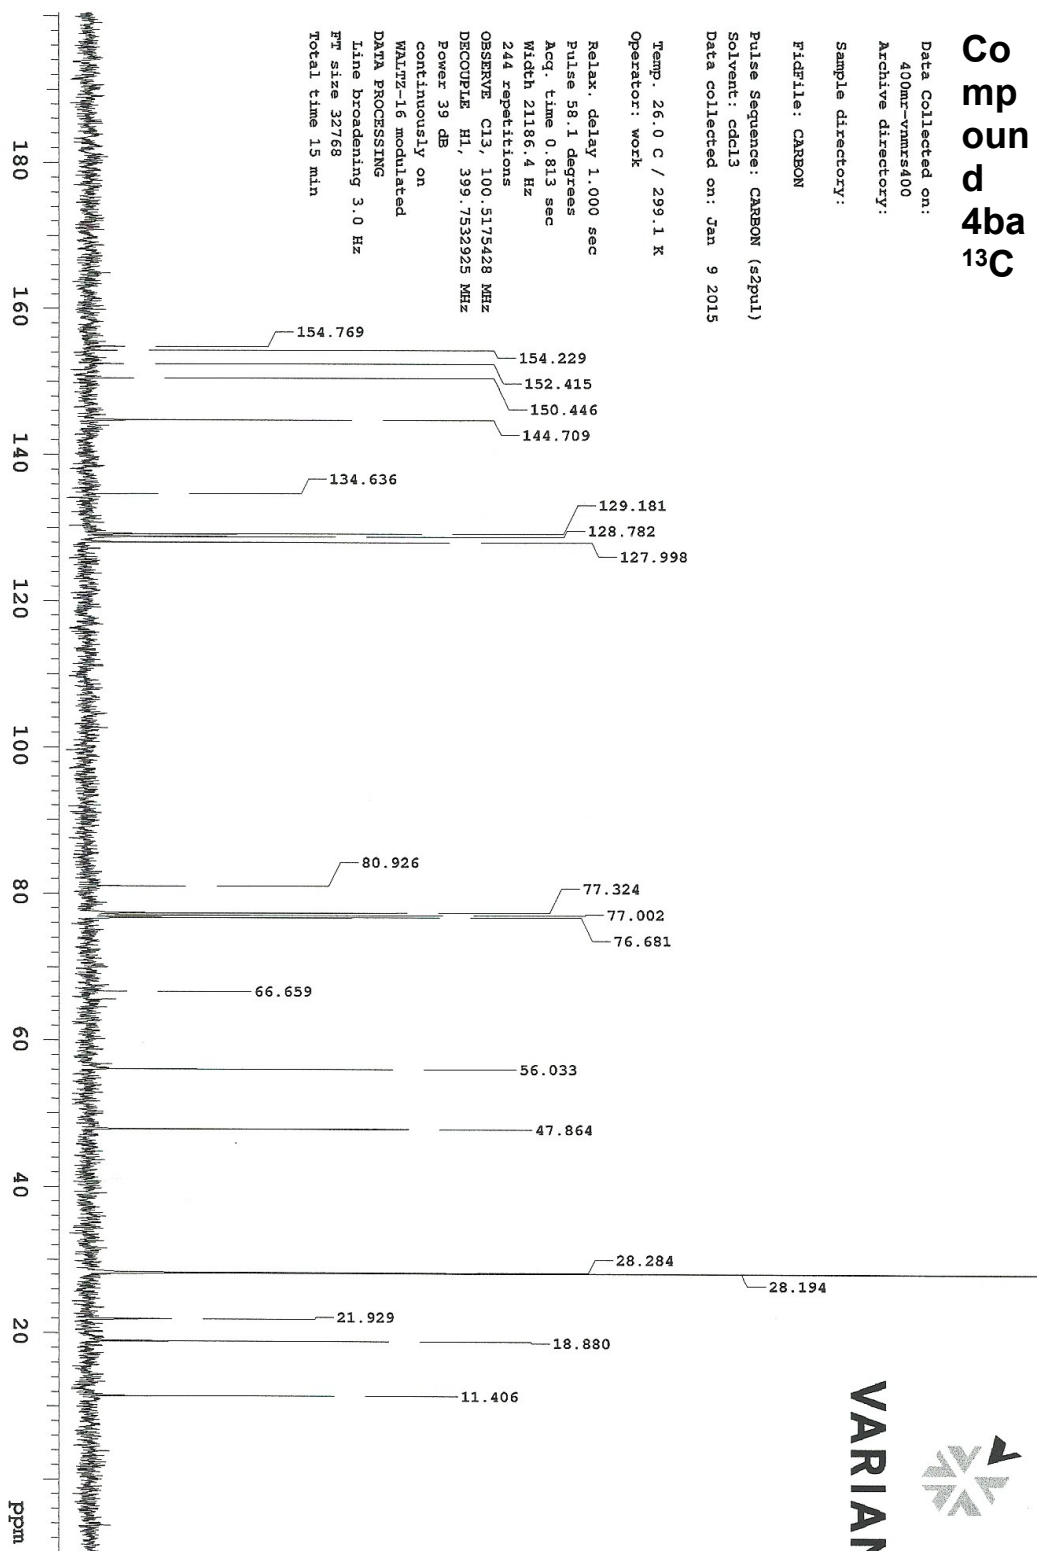

VARIAN

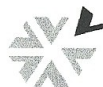

# Compound 5ba <sup>1</sup>H

Data Collected on:  
400mr-vnmr400  
Archive directory:

Sample directory:

FIDFile: PROTON

Pulse Sequence: PROTON (s2pul)  
Solvent: dms0  
Data collected on: May 7 2015

Temp. 25.0 C / 298.1 K  
Operator: work

Relax. delay 5.000 sec  
Pulse 79.4 degrees  
Acq. time 1.278 sec  
Width 6410.3 Hz  
32 repetitions  
OBSERVE H1, 399.7531926 MHz  
DATA PROCESSING  
Line broadening 0.5 Hz  
F<sub>2</sub> size 16384  
Total time 3 min 21 sec

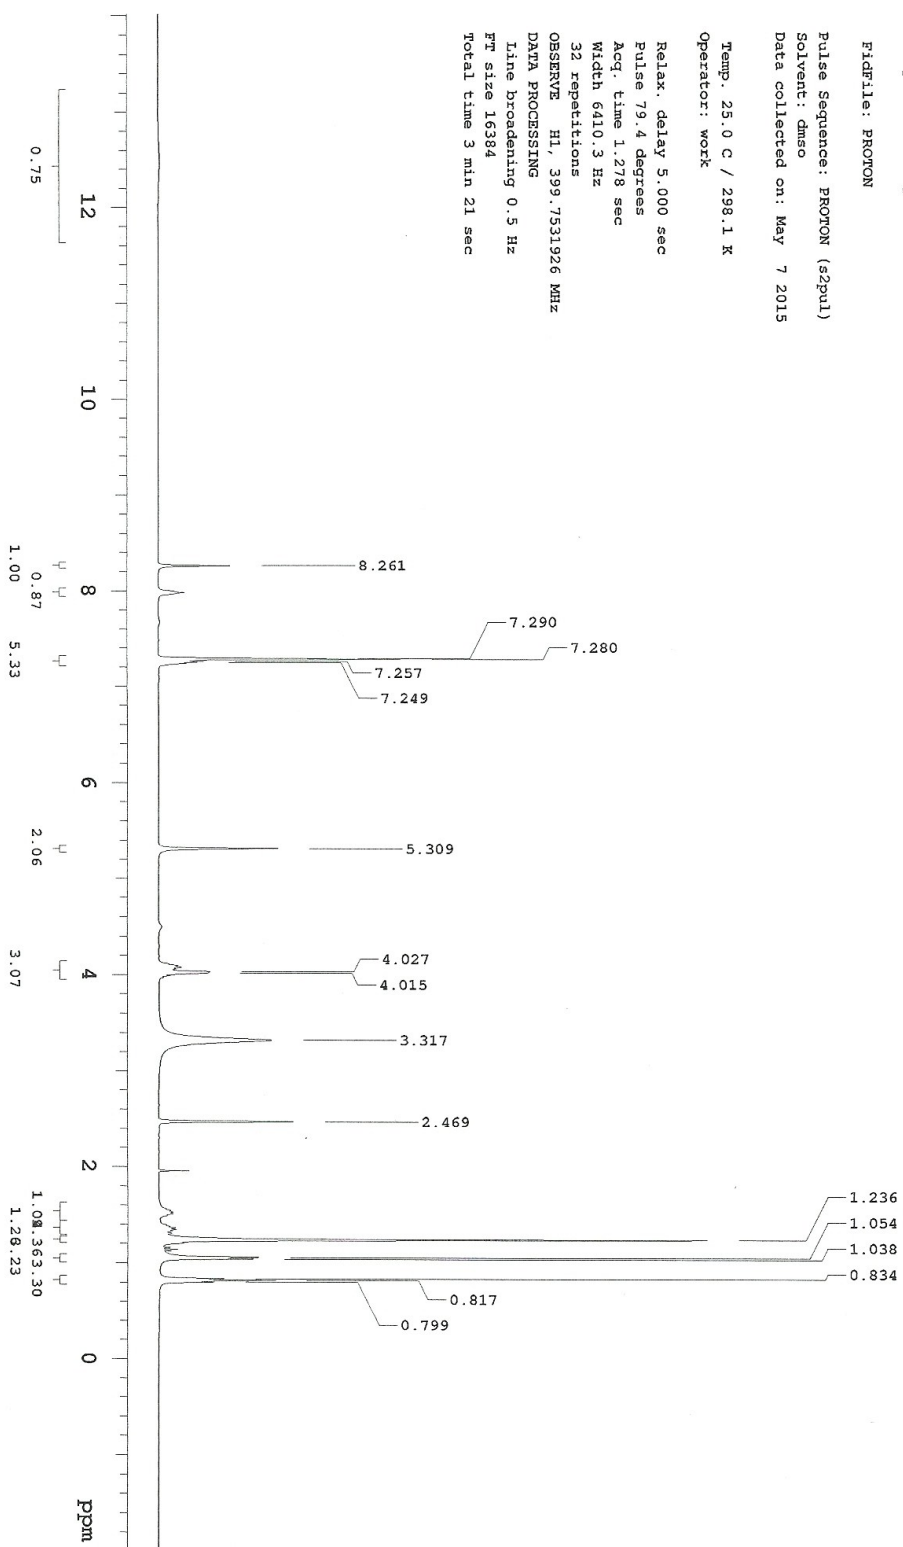

VARIAN

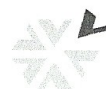

# Compound 5ba <sup>13</sup>C

Data Collected on:  
400mr-vmmrs400  
Archive directory:

Sample directory:

File: CARBON

Pulse Sequence: CARBON (s2pul)  
Solvent: dmsc  
Data collected on: May 7 2015

Temp. 25.0 C / 298.1 K  
Operator: work

Relax. delay 1.000 sec  
Pulse 58.1 degrees  
Acq. time 0.813 sec  
Width 25510.2 Hz

500 repetitions  
OBSERVE C13, 100.5180202 MHz  
DECOUPLE H1, 399.7551914 MHz  
Power 39 dB  
continuously on  
WALTZ-16 modulated  
DATA PROCESSING  
Line broadening 3.0 Hz  
FT size 32768  
Total time 15 min

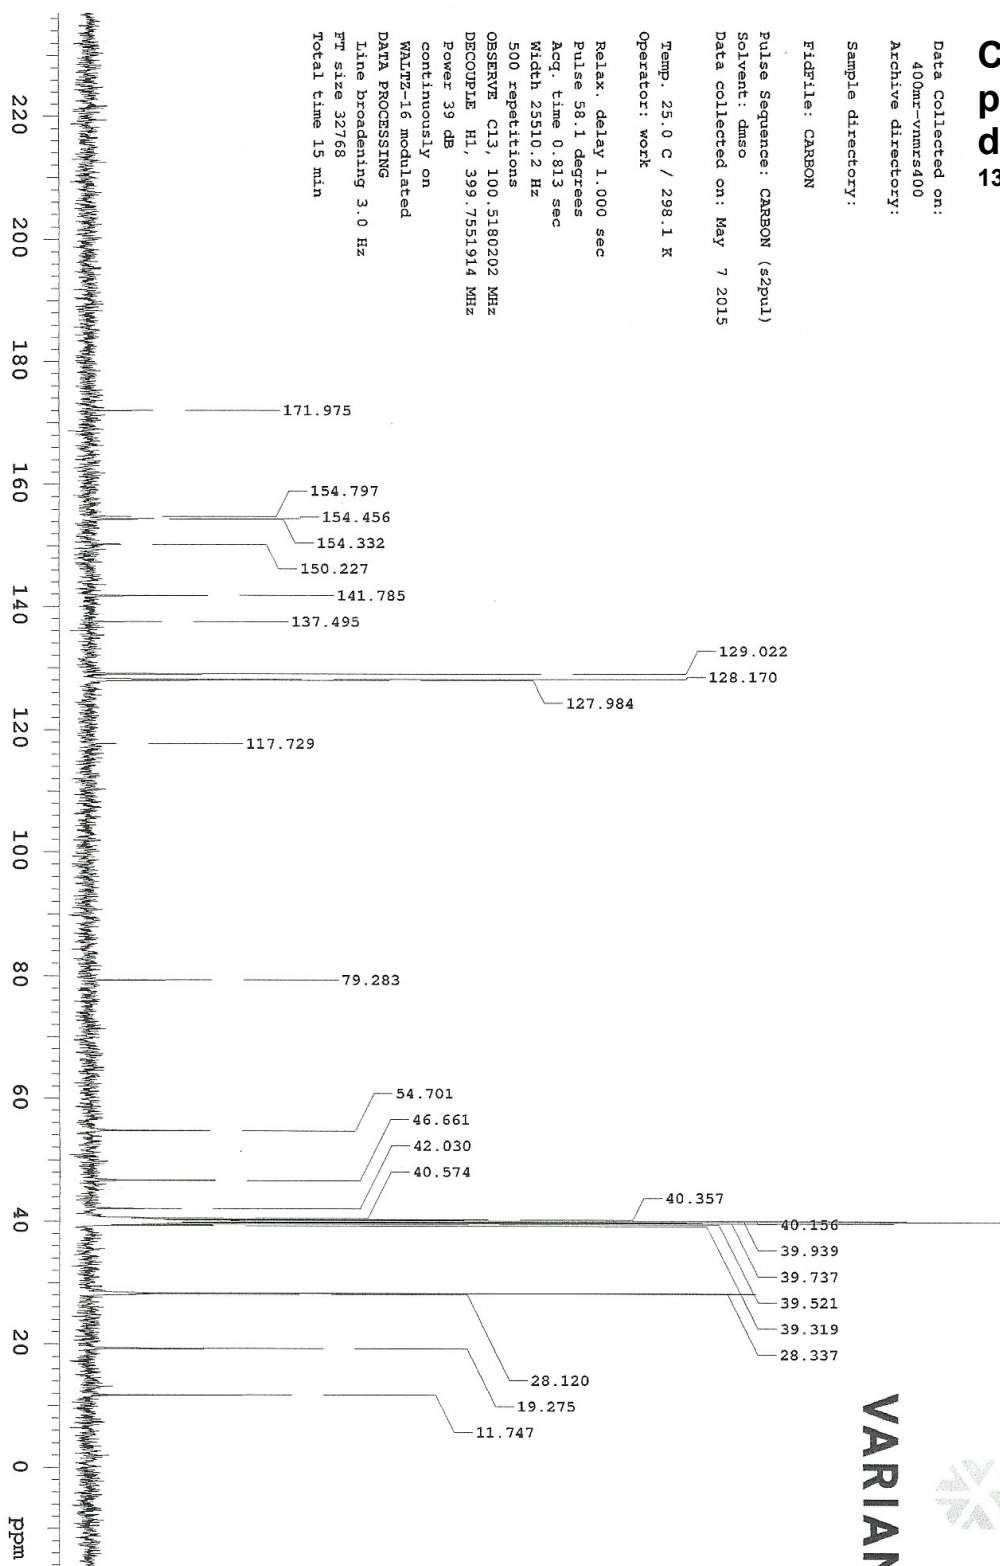

VARIAN

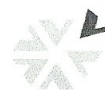

# Compound 3c <sup>1</sup>H

Data Collected on:  
400mr-vnmr5400  
Archive directory:

Sample directory:

File: MEI-2-165p-1H

Pulse Sequence: PROTON (s2pul)

Solvent: cdcl3

Data collected on: Apr 30 2014

Temp. 26.0 C / 299.1 K  
Operator: work

Relax. delay 5.000 sec

Pulse 79.4 degrees

Acq. time 1.278 sec

Width 6410.3 Hz

32 repetitions

OBSERVE H1, 399.7512938 MHz

DATA PROCESSING

Line Broadening 0.5 Hz

FT size 16384

Total time 3 min 21 sec

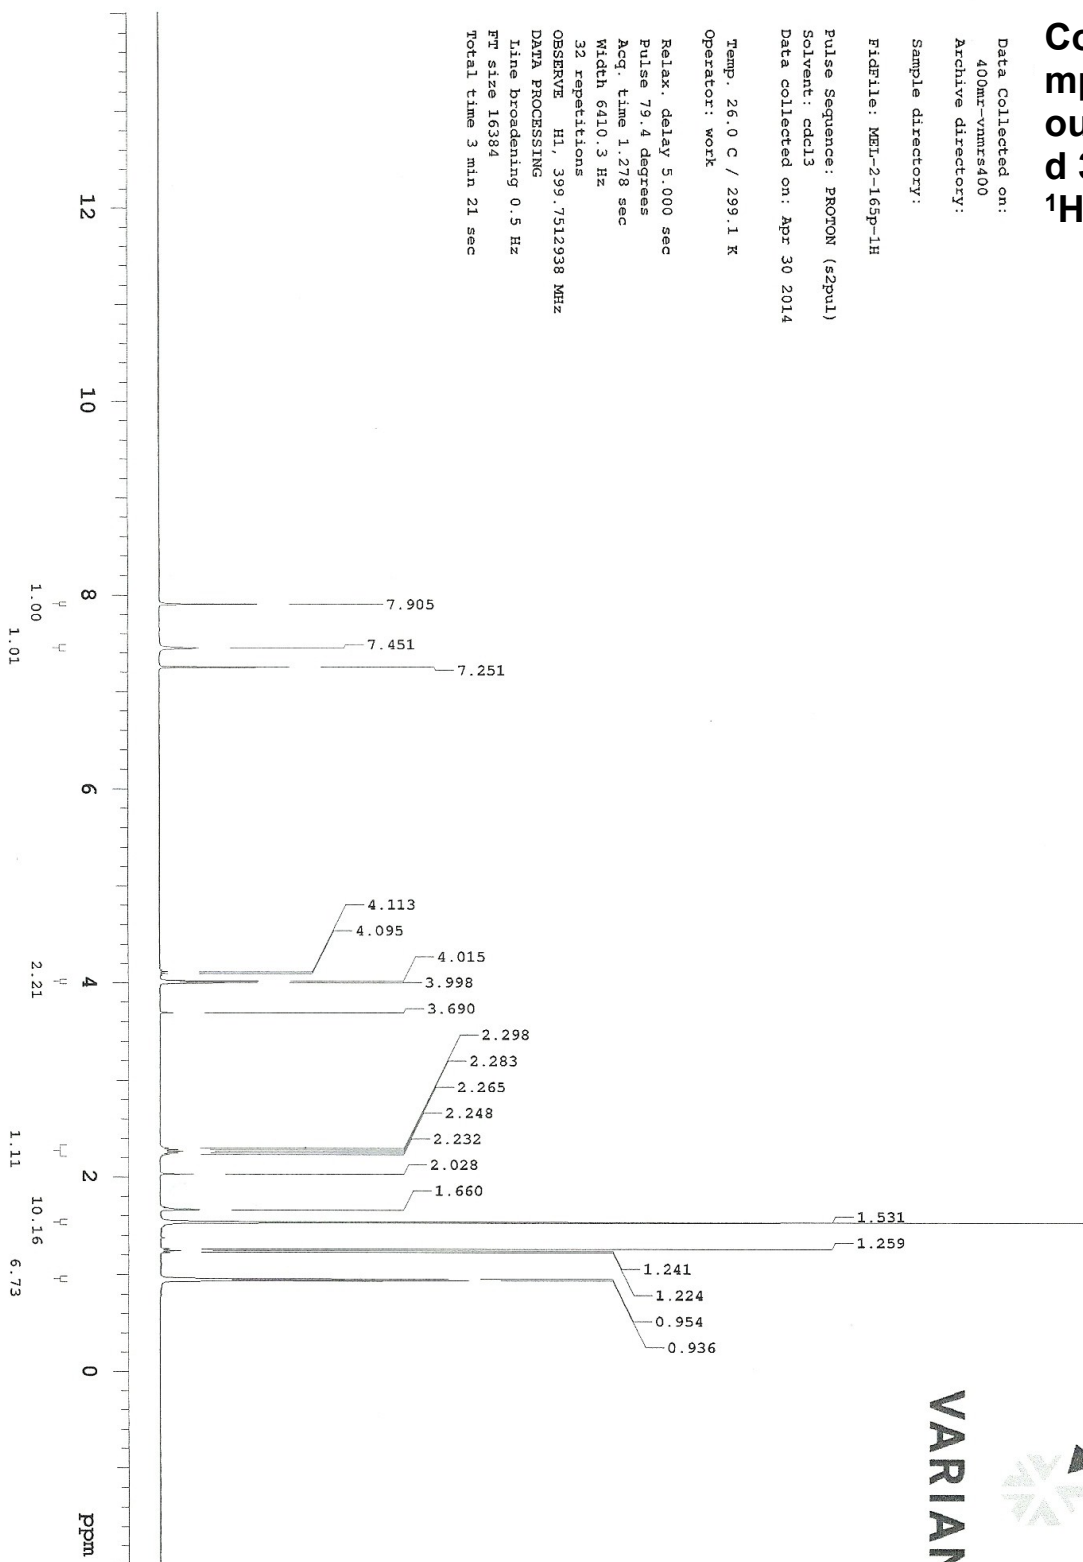

VARIAN

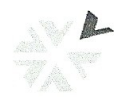



# Compound 3c <sup>13</sup>C

Data Collected on:  
40umr-vnmr5400  
Archive directory:

Sample directory:

FidFile: MEL-2-165-13C

Pulse Sequence: CARBON (42pul)

Solvent: cdcl3

Data collected on: Apr 30 2014

Temp. 26.0 C / 299.1 K

Operator: work

Relax. delay 1.000 sec  
Pulse 45.0 degrees  
Acq. time 1.285 sec  
Width 25510.2 Hz  
200 repetitions  
OBSERVE C13, 100.5175428 MHz  
DECOUPLE H1, 399.7532925 MHz  
Power 39 dB  
continuously on  
MATHZ-16 modulated  
DATA PROCESSING  
Line broadening 0.5 Hz  
Ft size 65536  
Total time 7 min 37 sec

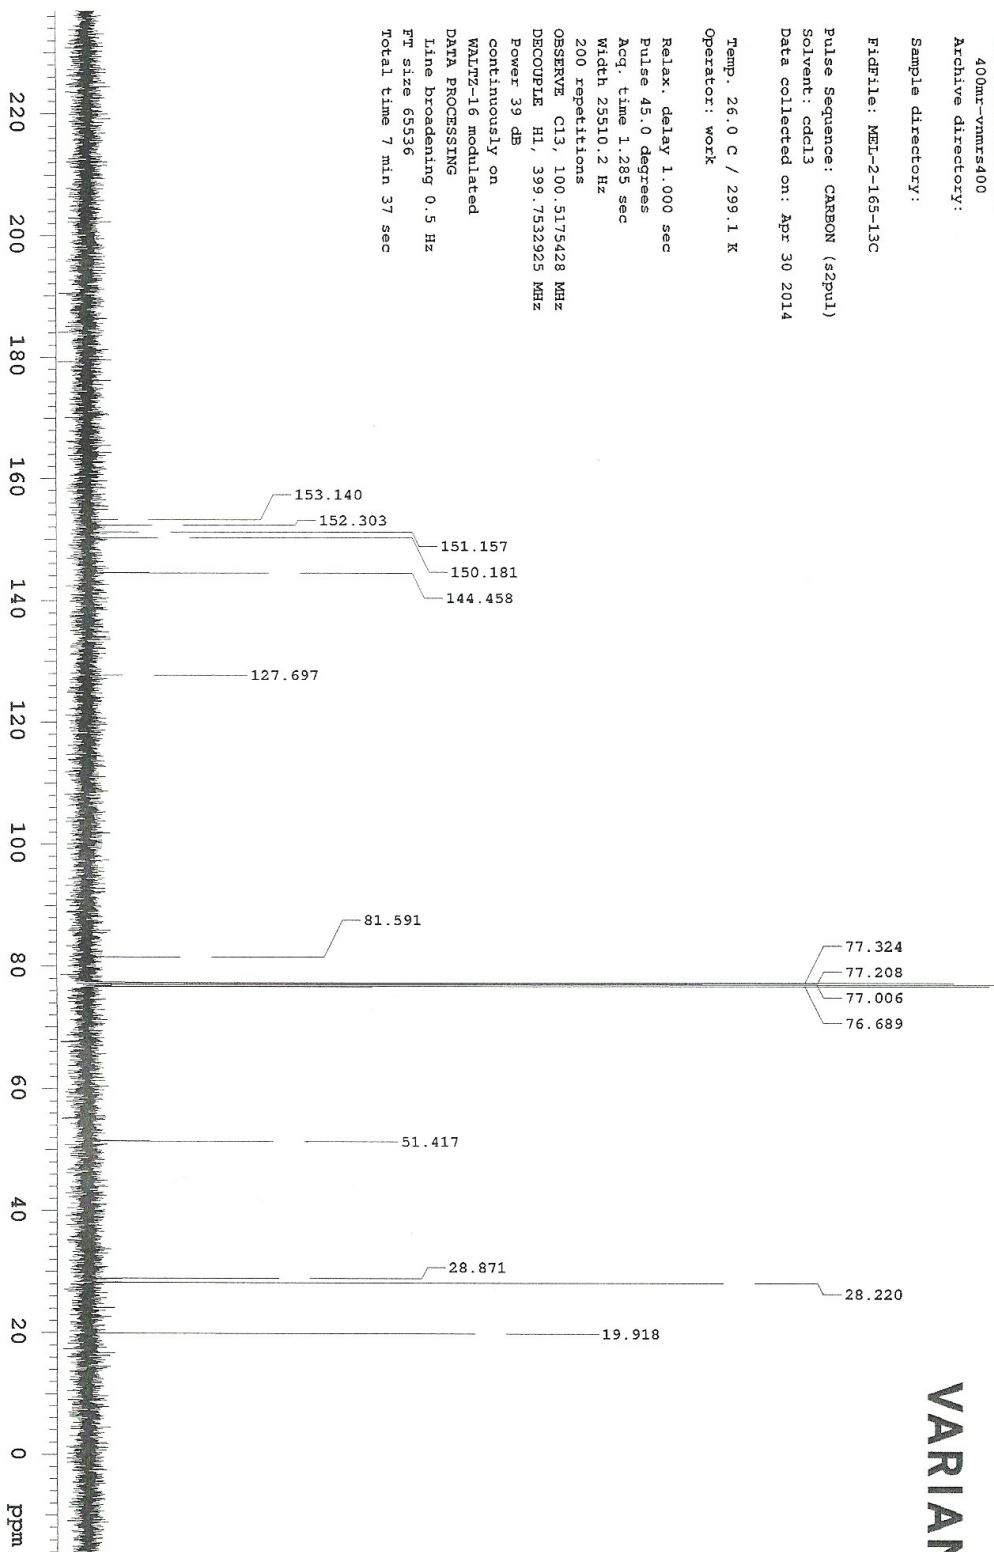

VARIAN

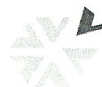

# Compound 4cb <sup>1</sup>H

Data Collected on:  
400mr-vnmr400  
Archive directory:

Sample directory:

File: MEL-2-170p-1H

Pulse Sequence: PROTON (szpul)  
Solvent: cdcl3  
Data collected on: Jan 9 2015

Temp. 26.0 C / 299.1 K  
Operator: work

Relax. delay 5.000 sec  
Pulse 79.4 degrees  
Acq. time 1.278 sec  
Width 6410.3 Hz  
32 repetitions  
OBSERVE H1, 399.7512938 MHz  
DATA PROCESSING  
Line broadening 0.5 Hz  
FT size 16384  
Total time 3 min 21 sec

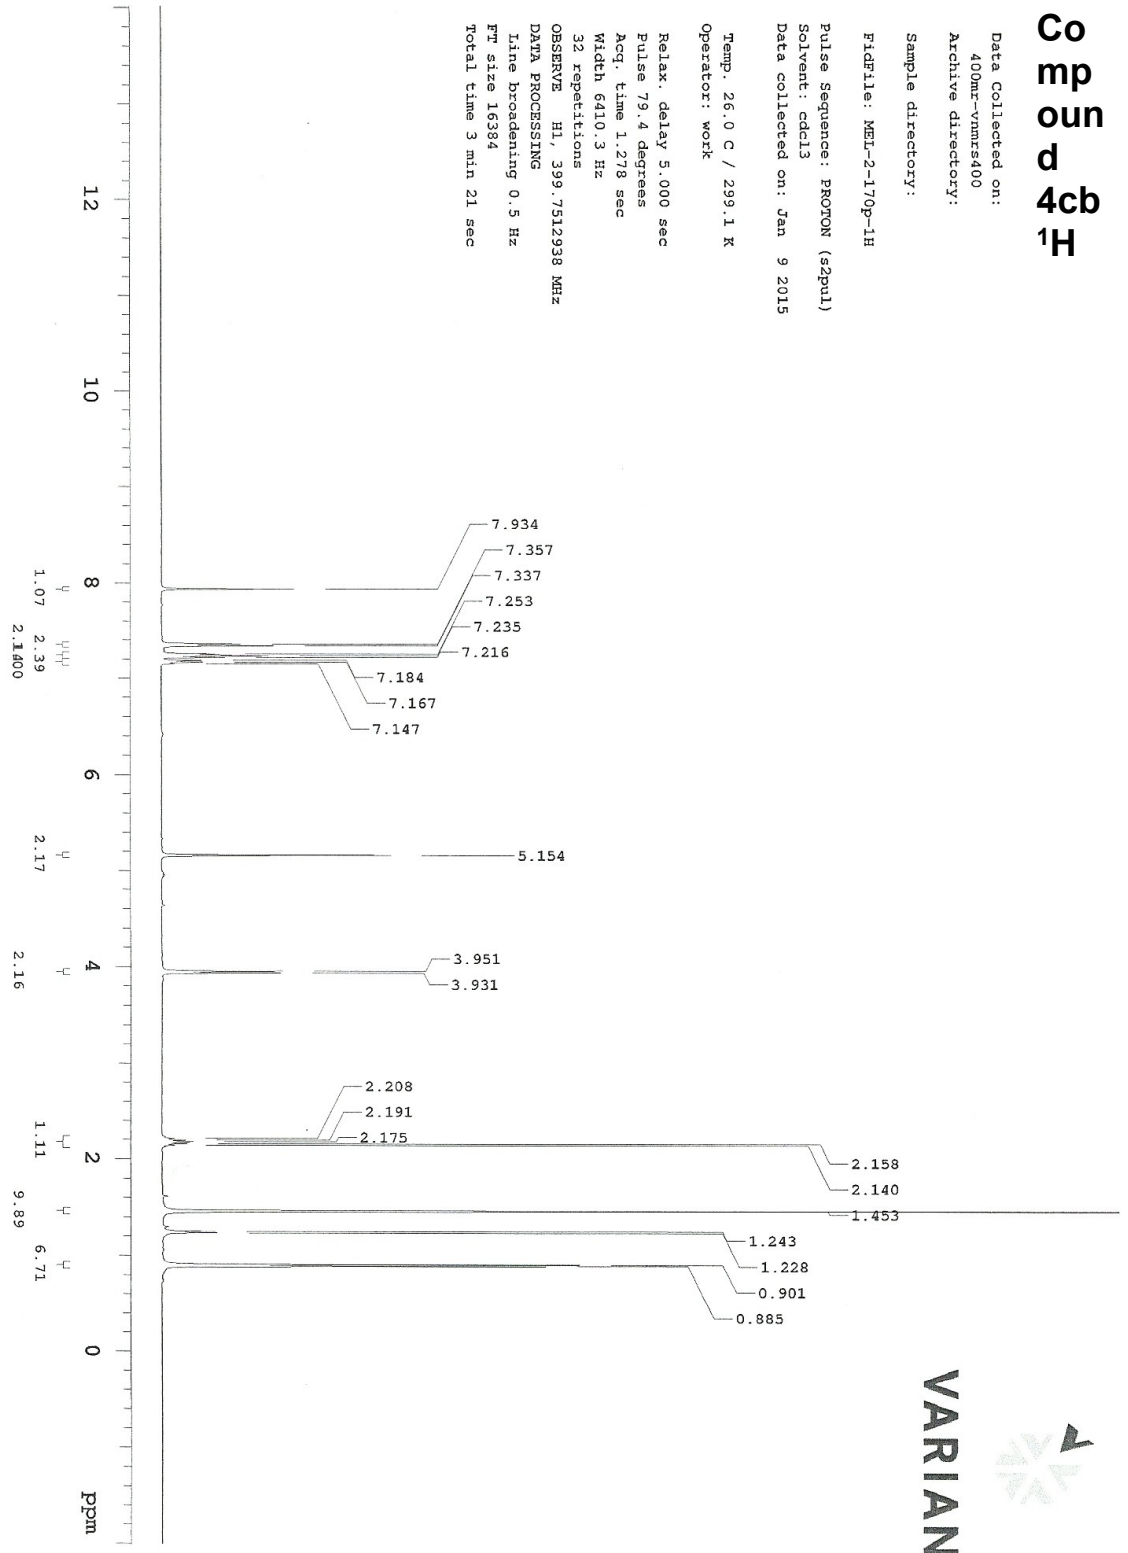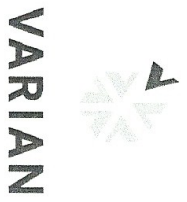

# Compound 4cb <sup>13</sup>C

Data Collected on:  
400mr-vnmr400  
Archive directory:

Sample directory:

FidFile: CARBON

Pulse Sequence: CARBON (zgpg1)  
Solvent: cdcl3  
Data collected on: Jan 9 2015

Temp. 25.0 C / 299.1 K  
Operator: work

Relax. delay 1.000 sec  
Pulse 58.1 degrees  
Acq. time 0.813 sec  
Width 21185.4 Hz  
160 repetitions  
OBSERVE CH, 100.5175428 MHz  
DECOUPLE H1, 399.7532925 MHz  
Power 39 dB  
continuously on  
WALTZ-16 modulated  
DATA PROCESSING  
Line broadening 3.0 Hz  
FT size 32768  
Total time 15 min

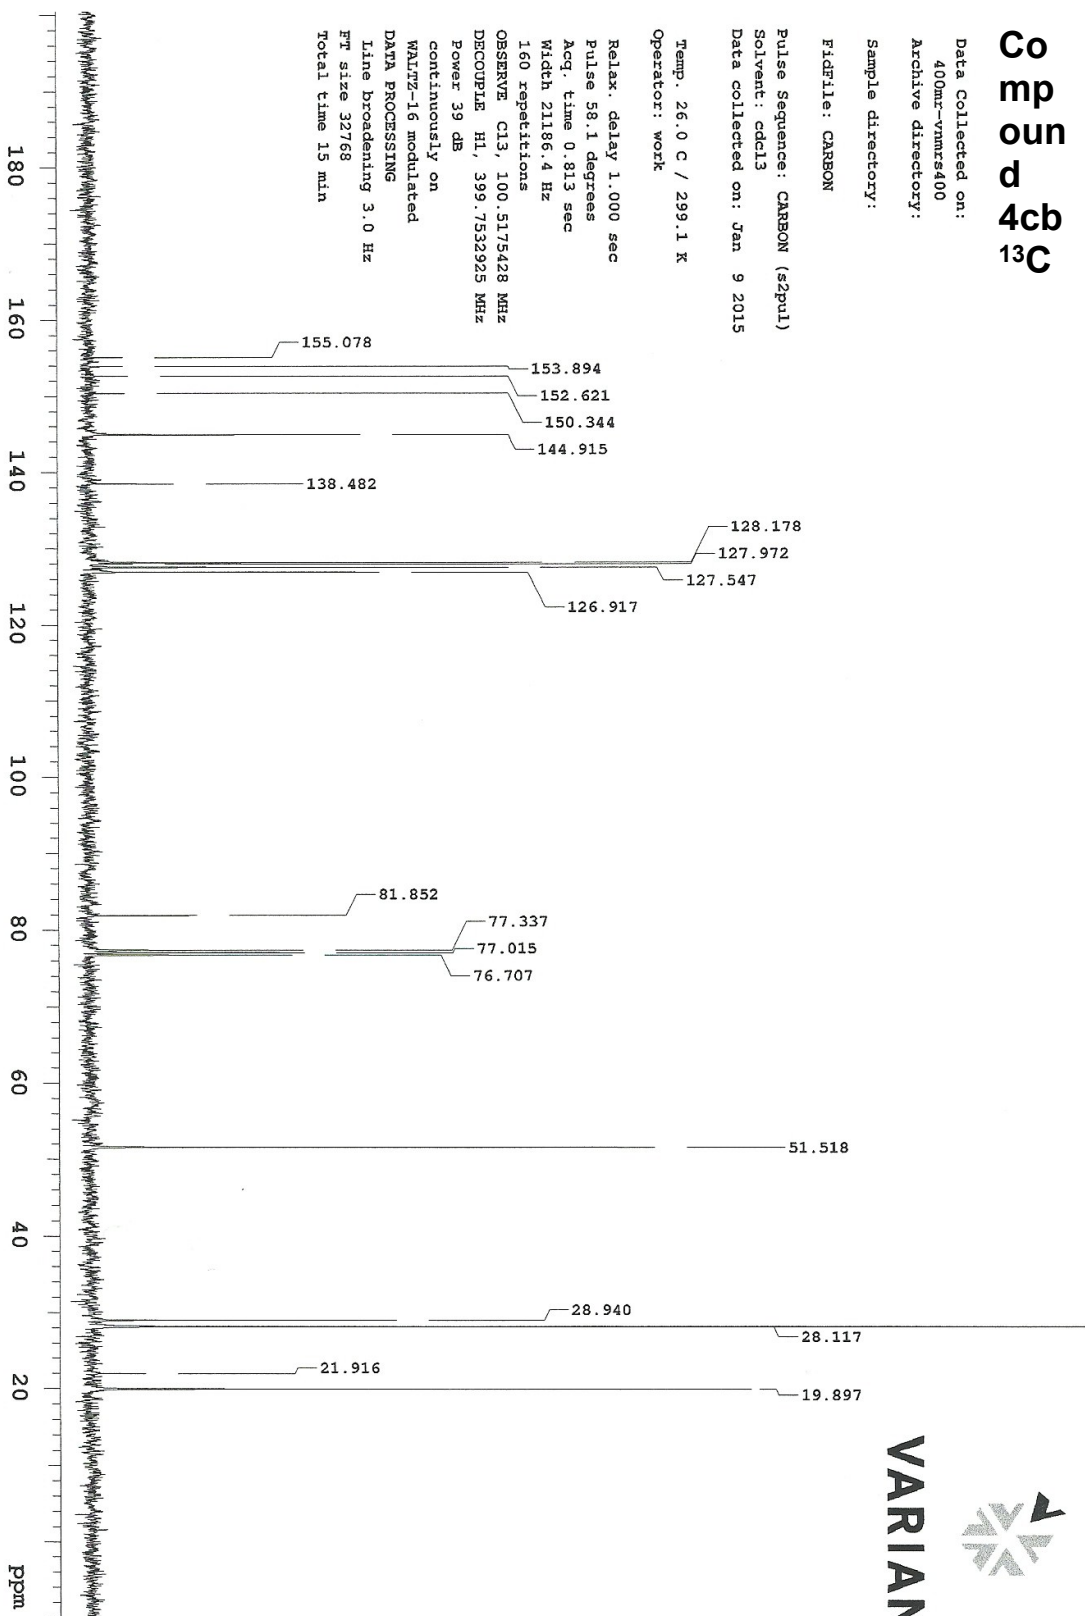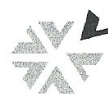

VARIAN

# Compound 5cb <sup>1</sup>H

Data Collected on:  
400mr-vnmr5400  
Archive directory:

Sample directory:

File: PROTON

Pulse Sequence: PROTON (s2pul)  
Solvent: dmsc  
Data collected on: Jan 5 2015

Temp. 25.0 C / 298.1 K  
Operator: work

Relax. delay 5.000 sec  
Pulse 45.0 degrees  
Acq. time 2.556 sec  
Width 6410.3 Hz  
32 repetitions  
OBSERVE H1, 399.7531785 MHz  
DATA PROCESSING  
F1 size 32768  
Total time 4 min 2 sec

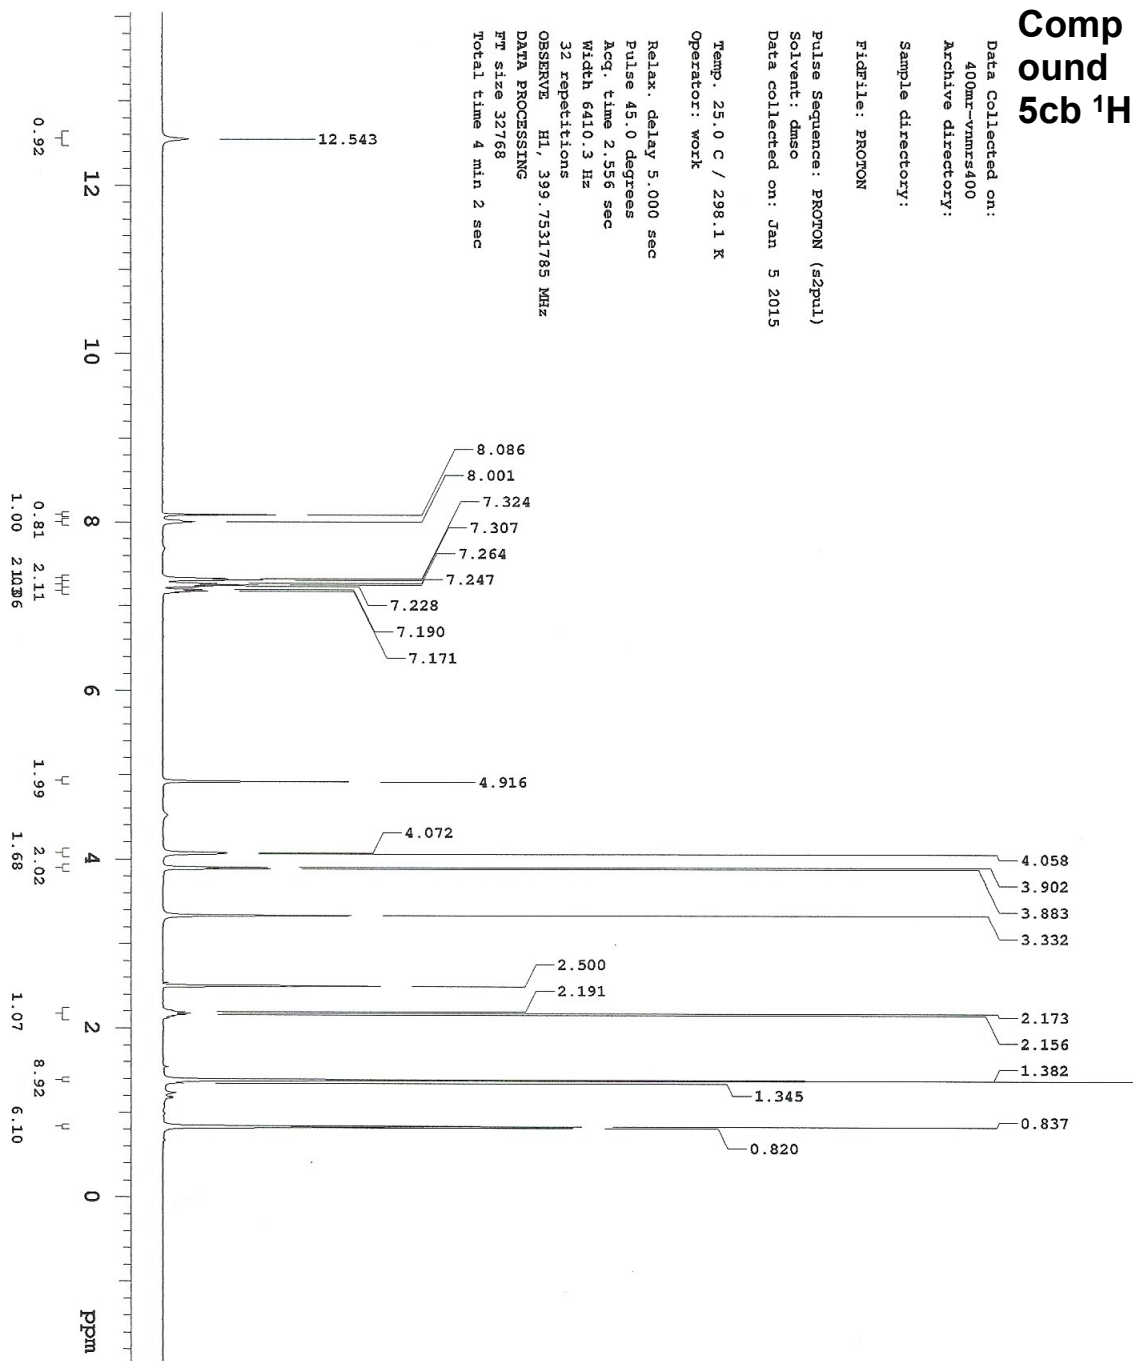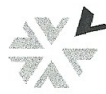

VARIAN

# Compound 5cb <sup>13</sup>C

Data Collected on:

400mr-vnmr3400

Archive directory:

Sample directory:

FIDFile: CARBON

Pulse Sequence: CARBON (s2pul)

Solvent: dmso

Data collected on: May 7 2015

Temp. 25.0 C / 298.1 K

Operator: work

Relax. delay 1.000 sec

Pulse 58.1 degrees

Acq. time 0.813 sec

Width 24509.8 Hz

500 repetitions

OBSERVE C13, 100.5180202 MHz

DECOUPLE H1, 399.7551914 MHz

Power 39 dB

continuously on

WALTZ-16 modulated

DATA PROCESSING

Line broadening 3.0 Hz

FT size 32768

Total time 15 min

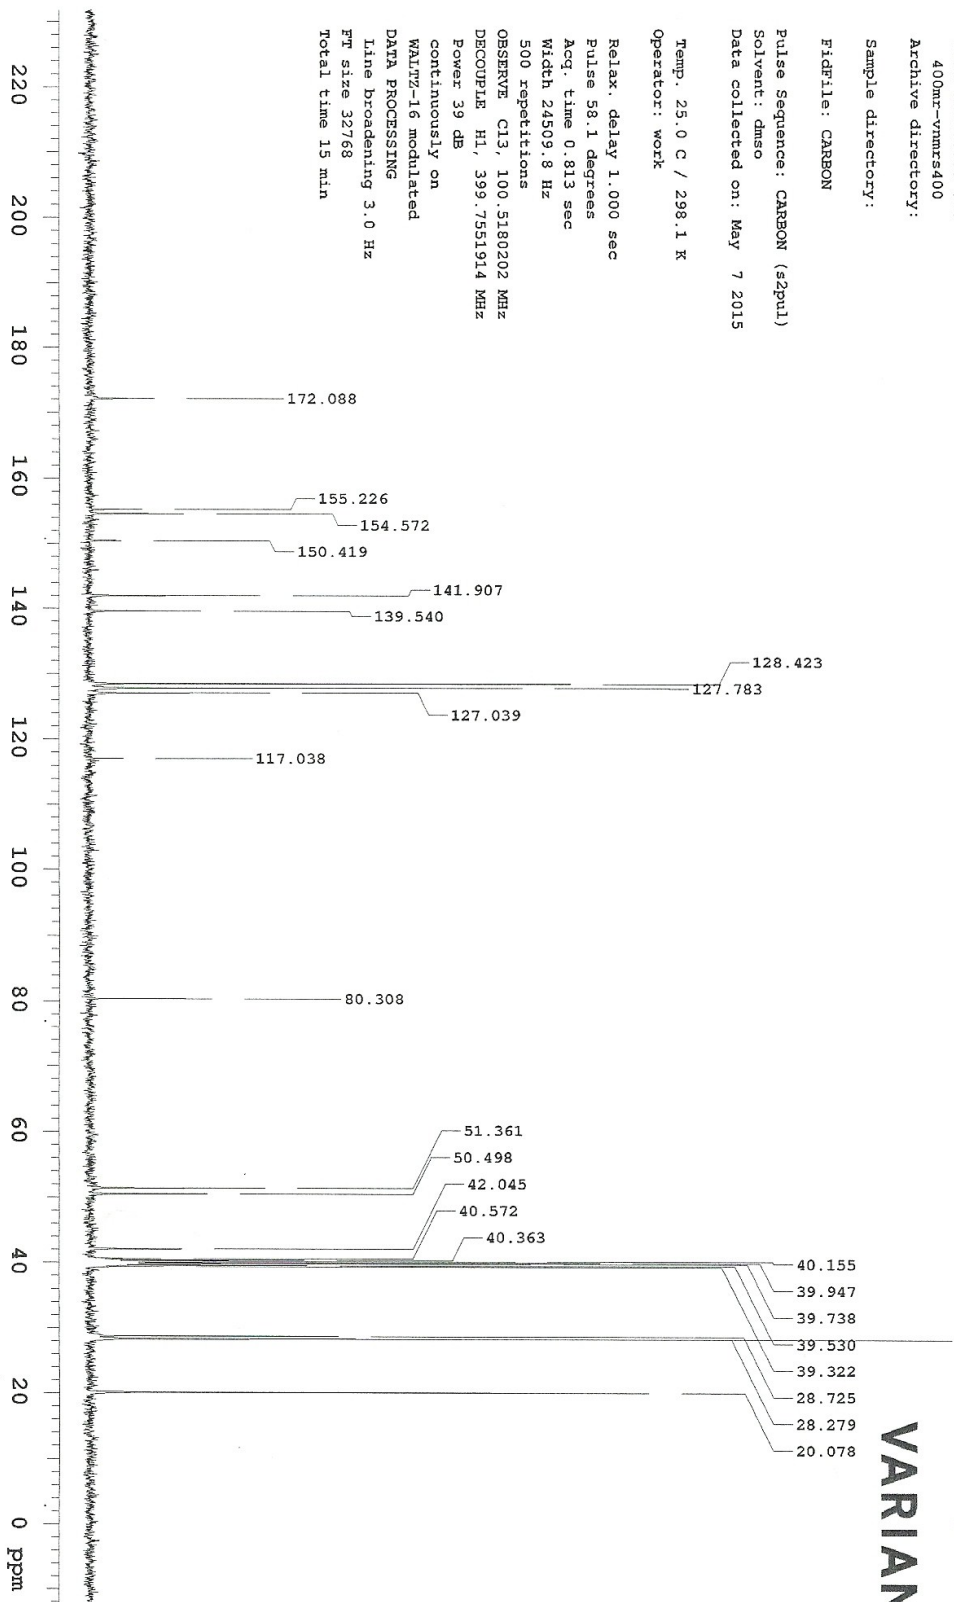

VARIAN

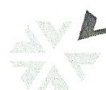



# Compound 3d <sup>13</sup>C

Data Collected on:  
400mr-vmr3400  
Archive directory:

Sample directory:

File: CARBON

Pulse Sequence: CARBON (s2pul)  
Solvent: dms  
Data collected on: Jan 19 2015

Temp. 26.0 C / 299.1 K  
Operator: work

Relax. delay 1.000 sec  
Pulse 58.1 degrees  
Acq. time 0.813 sec  
Width 24509.8 Hz  
212 repetitions  
OBSERVE C13, 100.5180202 MHz  
DECOUPLE H1, 399.7551914 MHz  
Power 39 dB  
continuously on  
WALTZ-16 modulated  
DATA PROCESSING  
Line broadening 3.0 Hz  
F2 size 32768  
Total time 12 min

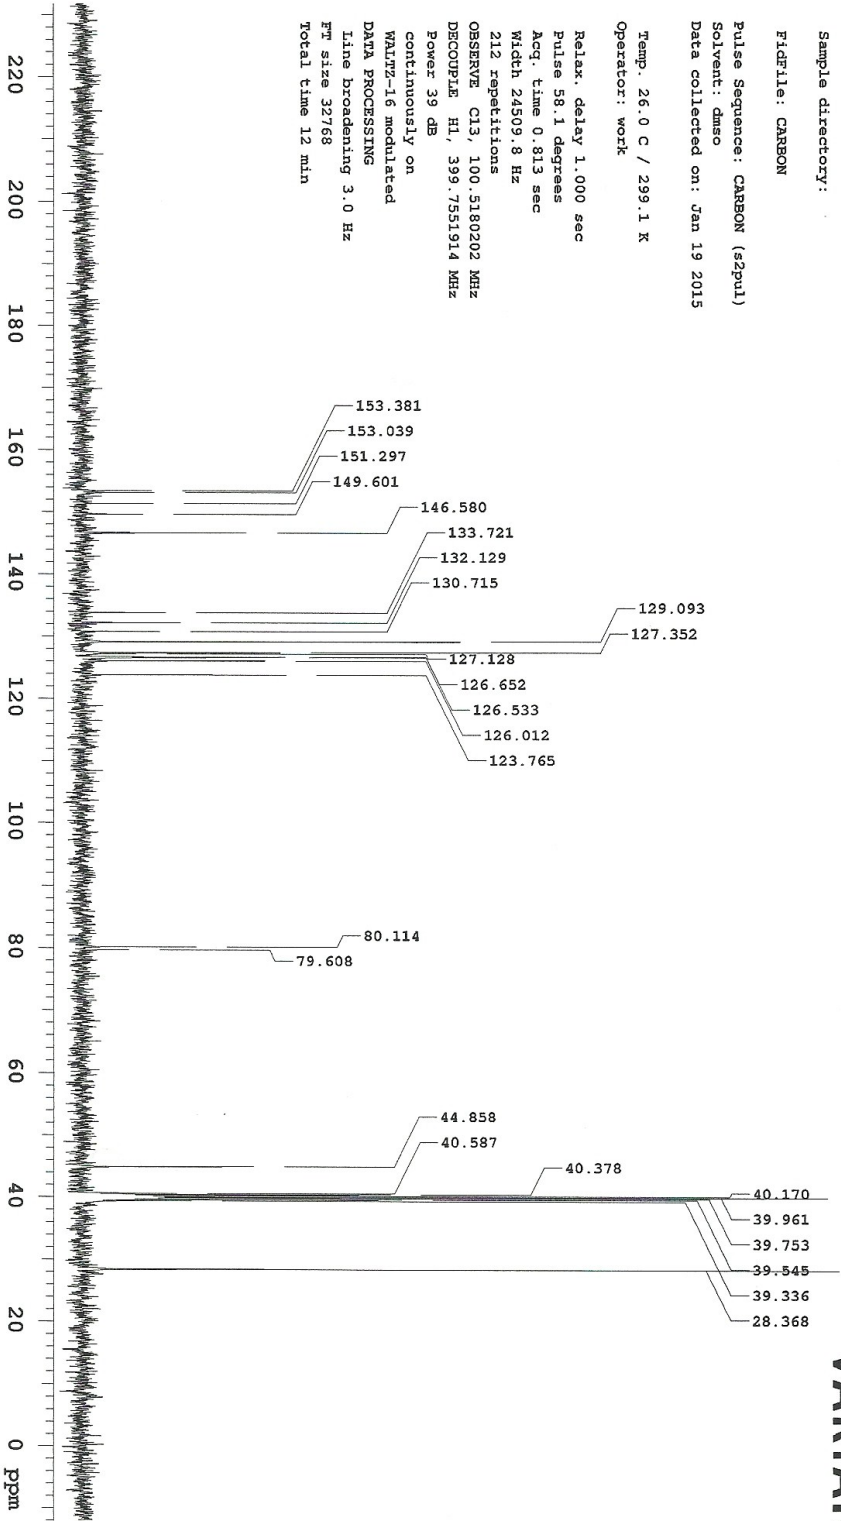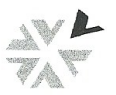

VARIAN

# Compound 4db <sup>1</sup>H

Data Collected on: 400mr-vmmrs400  
Archive directory:

Sample directory:

FIDfile: PROTON

Pulse Sequence: PROTON (szpul)  
Solvent: dmso  
Data collected on: Jan 21 2015

Temp: 26.0 C / 299.1 K  
Operator: work

Relax. delay 5.000 sec  
Pulse 45.0 degrees  
Acq. time 2.556 sec  
Width 6410.3 Hz  
32 repetitions  
OBSERVE H1, 399.7531793 MHz  
DATA PROCESSING  
FT size 32768  
Total time 4 min 2 sec

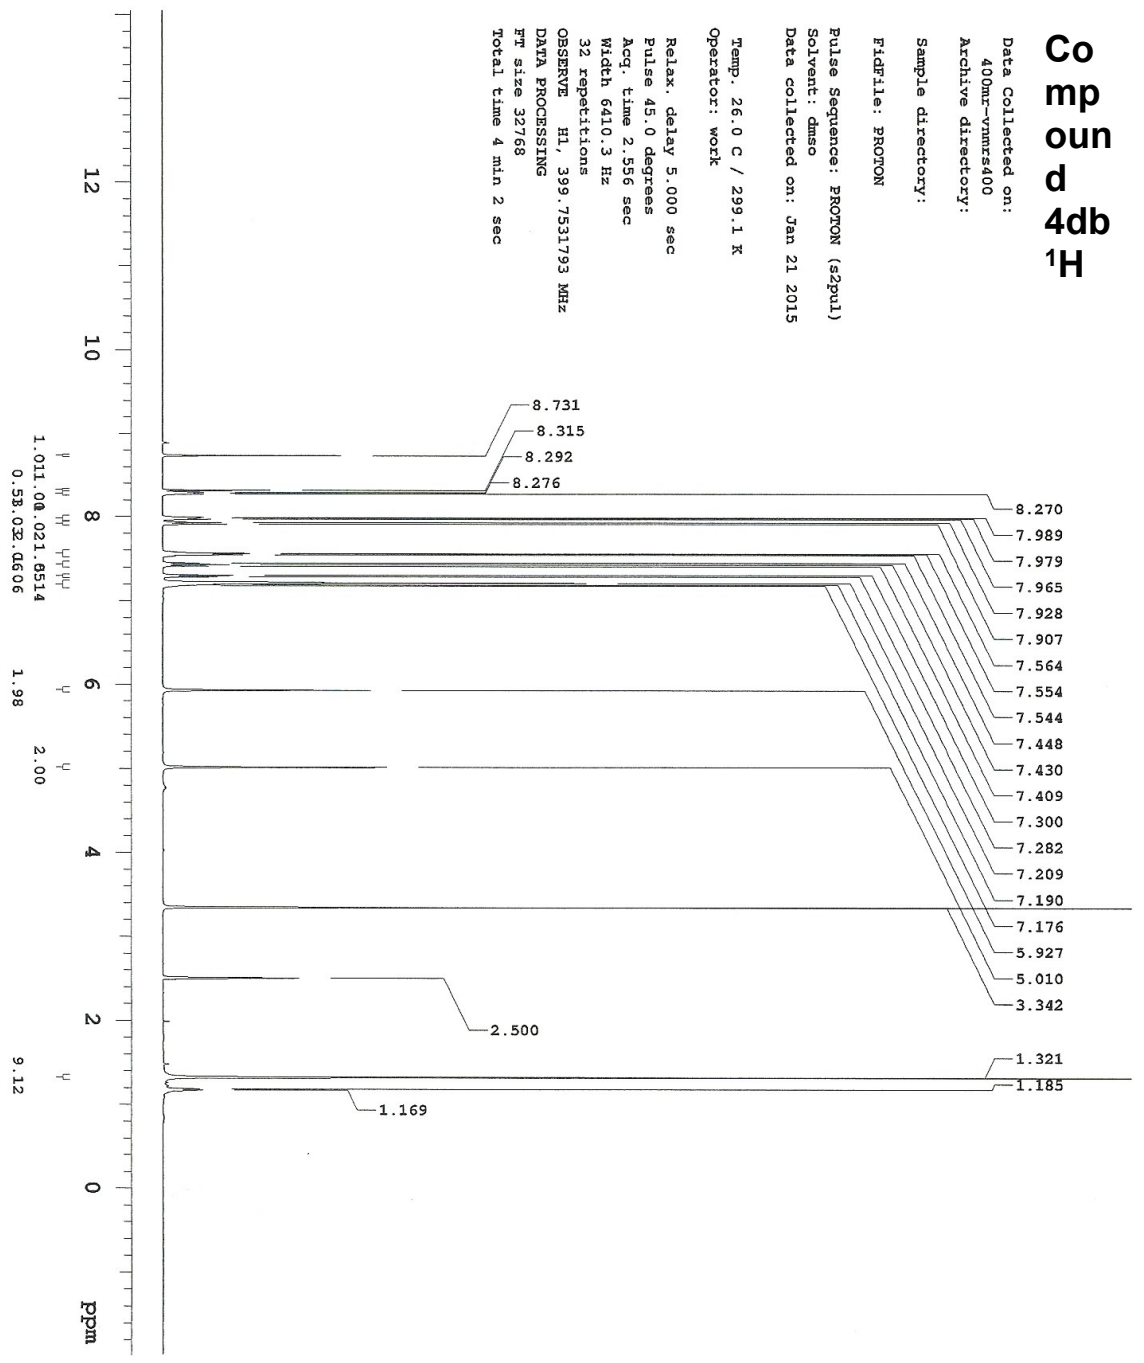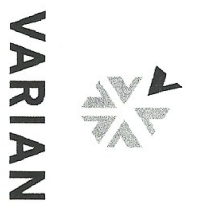



# Compound 4db <sup>13</sup>C

Data Collected on:  
400mr-vnmz5400

Archive directory:

Sample directory:

Fidfile: CARBON  
Pulse Sequence: CARBON (s2pul1)  
Solvent: dmsd  
Data collected on: Jan 21 2015

Temp. 26.0 C / 299.1 K  
Operator: work

Relax. delay 1.000 sec  
Pulse 58.1 degrees  
Acq. time 0.813 sec  
Width 24509.8 Hz  
308 repetitions  
OBSERVE C13, 100.5180202 MHz  
DECOUPLE H1, 399.7551914 MHz  
Power 39 db  
continuously on  
WALTZ-16 modulated  
DATA PROCESSING  
Line broadening 3.0 Hz  
Ft size 32768  
Total time 15 min

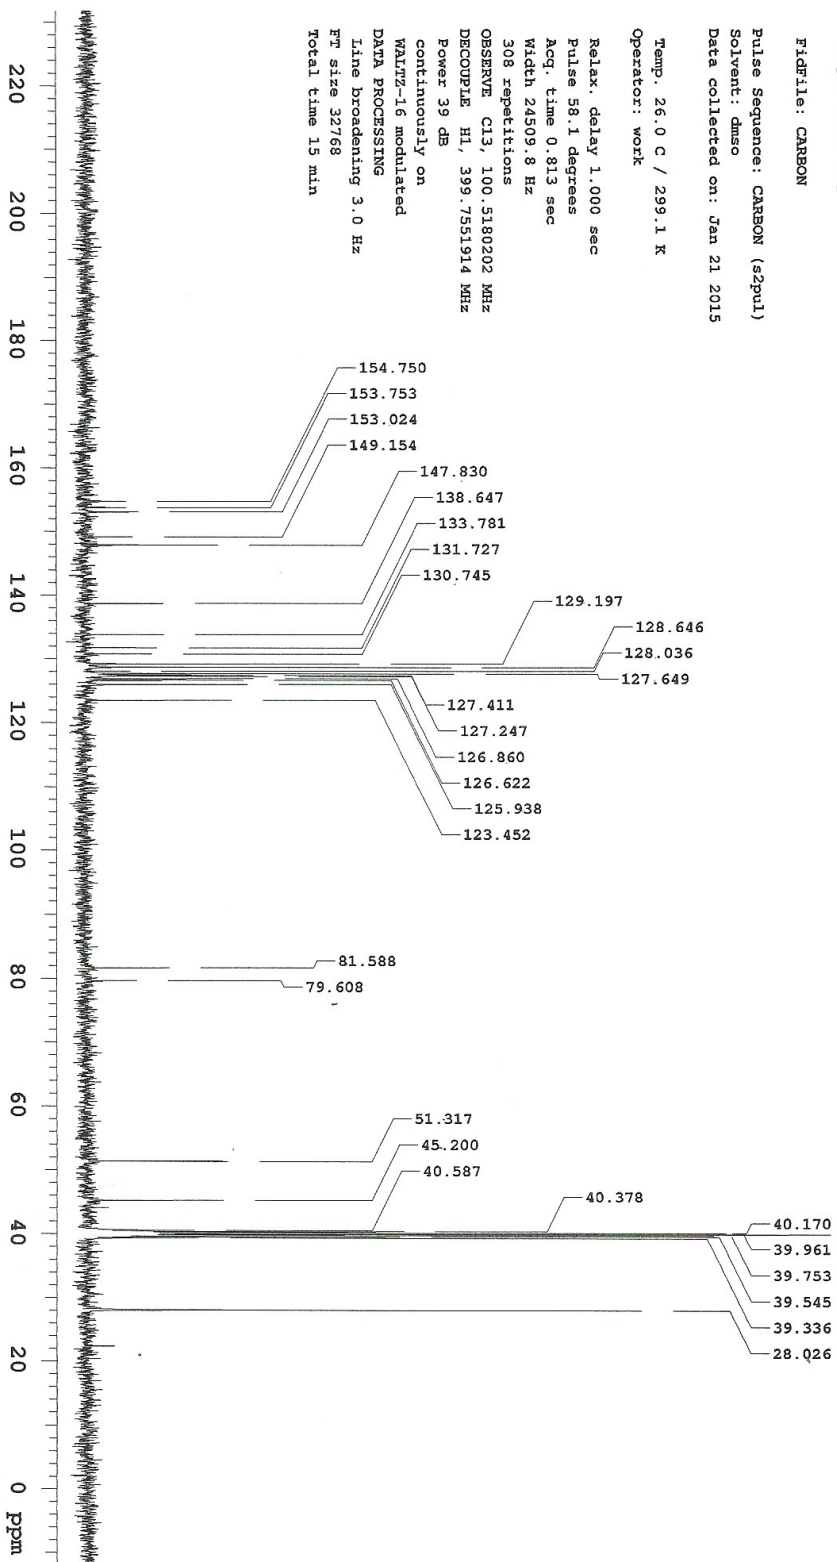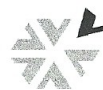

VARIAN

# Compound 5db <sup>1</sup>H

Data Collected on:  
400mr-vmmr400  
Archive directory:

Sample directory:

FidFile: PROTON

Pulse Sequence: PROTON (s2pu1)  
Solvent: dms0  
Data collected on: May 9 2015

Temp. 25.0 C / 298.1 K  
Operator: work

Relax. delay 5.000 sec  
Pulse 79.4 degrees  
Acq. time 1.278 sec  
Width 6410.3 Hz  
32 repetitions  
OBSERVE H1, 399.7531748 MHz  
DATA PROCESSING  
Line broadening 0.5 Hz  
F1 size 16384  
Total time 3 min 21 sec

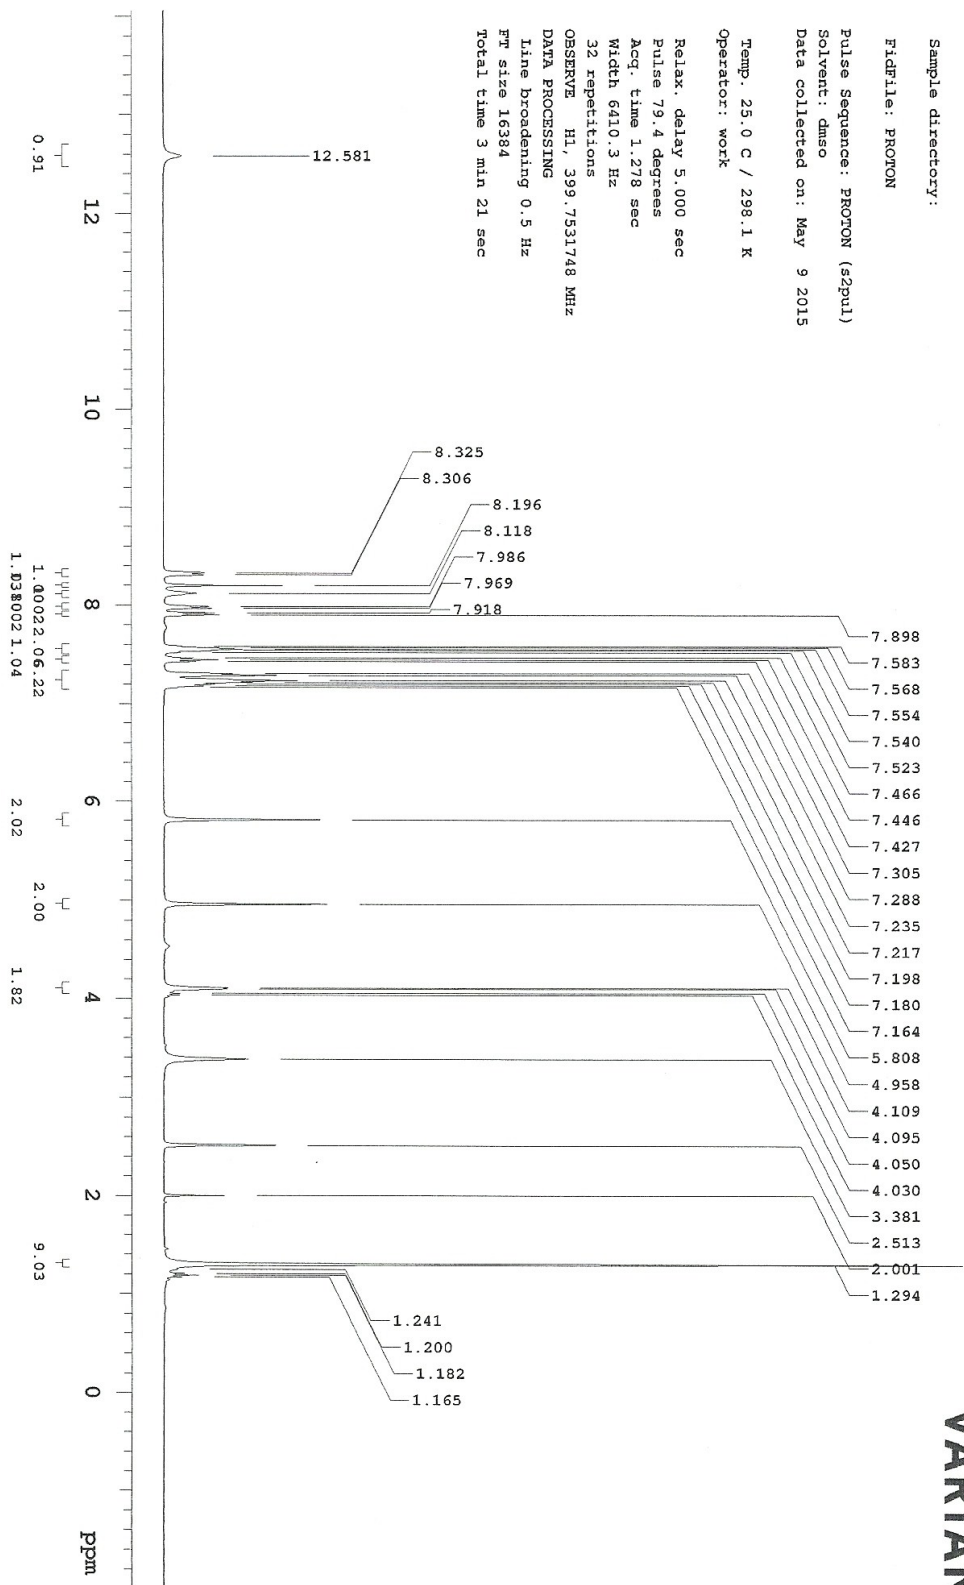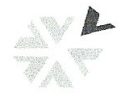

VARIAN

# Compound 5db <sup>13</sup>C

Data Collected on:  
400mr-vnmr400

Archive directory:

Sample directory:

Filefile: CARBON

Pulse Sequence: CARBON (szpul)  
Solvent: dmsc  
Data collected on: May 9 2015

Temp. 25.0 C / 298.1 K  
Operator: work

Relax. delay 1.000 sec  
Pulse 58.1 degrees  
Acq. time 0.813 sec  
Width 24509.8 Hz

236 repetitions  
OBSERVE C13, 100.5180202 MHz  
DECOUPLE H1, 399.7551914 MHz  
Power 39 dB  
continuously on  
WALTZ-16 modulated  
DATA PROCESSING  
Line broadening 3.0 Hz  
F1 size 32768  
Total time 18 min

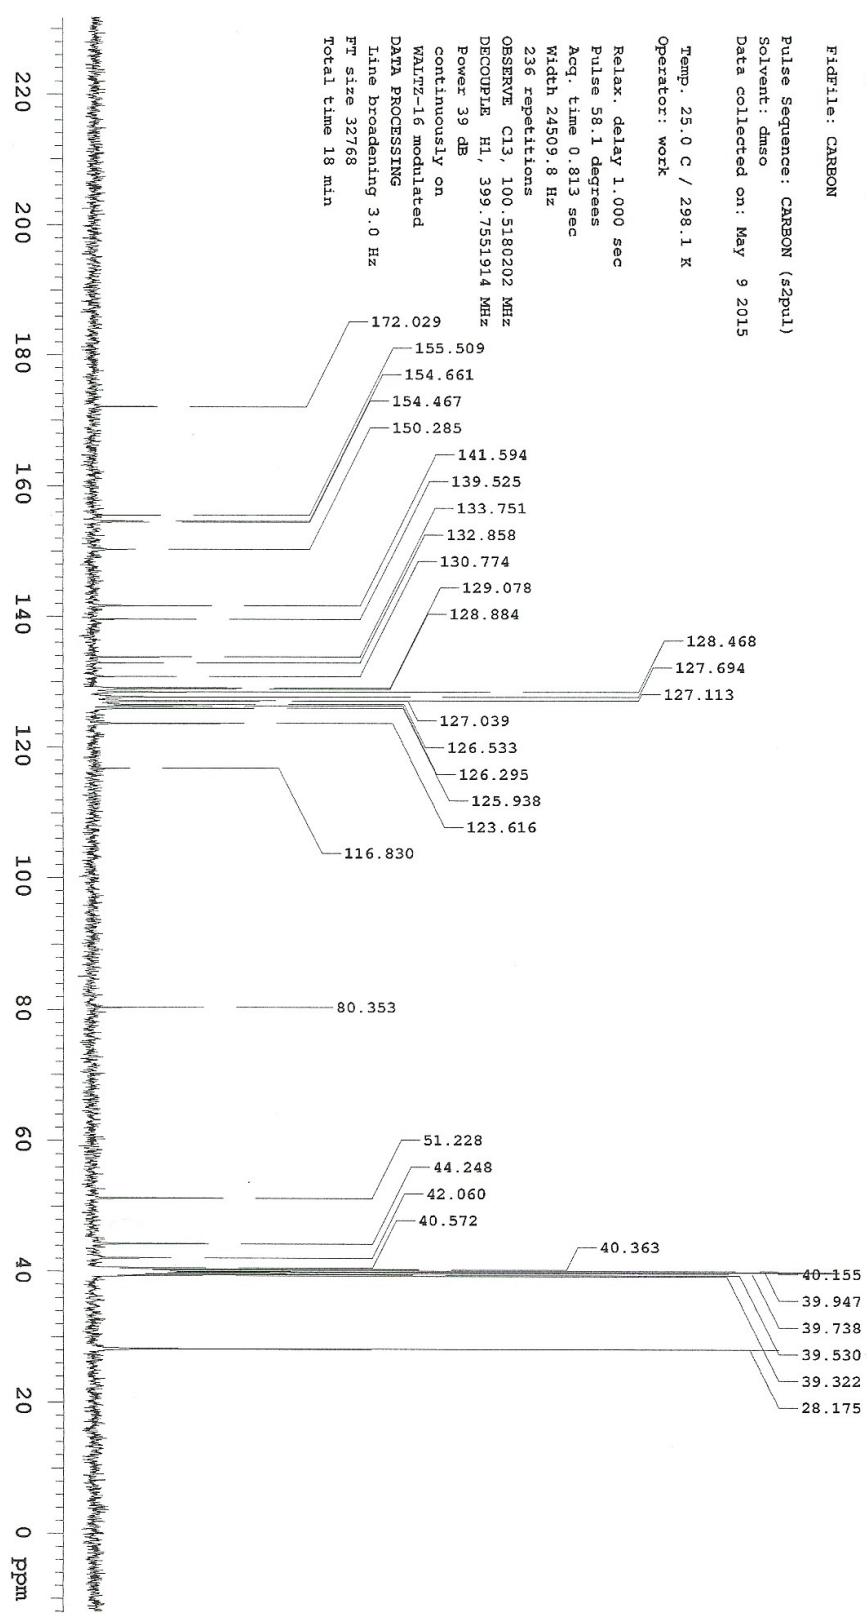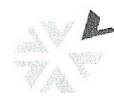

VARIAN

# Compound 5dc <sup>1</sup>H

Data Collected on:  
400mr-vnmr400  
Archive directory:

Sample directory:

File: PROTON

Pulse Sequence: PROTON (s2pul)  
Solvent: dmsc  
Data collected on: May 7 2015

Temp. 25.0 C / 298.1 K  
Operator: work  
Relax. delay 5.000 sec  
Pulse 79.4 degrees  
Acq. time 1.278 sec  
Width 6410.3 Hz  
32 repetitions  
OBSERVE H1, 399.7531802 MHz  
DATA PROCESSING  
Line broadening 0.5 Hz  
FT size 16384  
Total time 3 min 21 sec

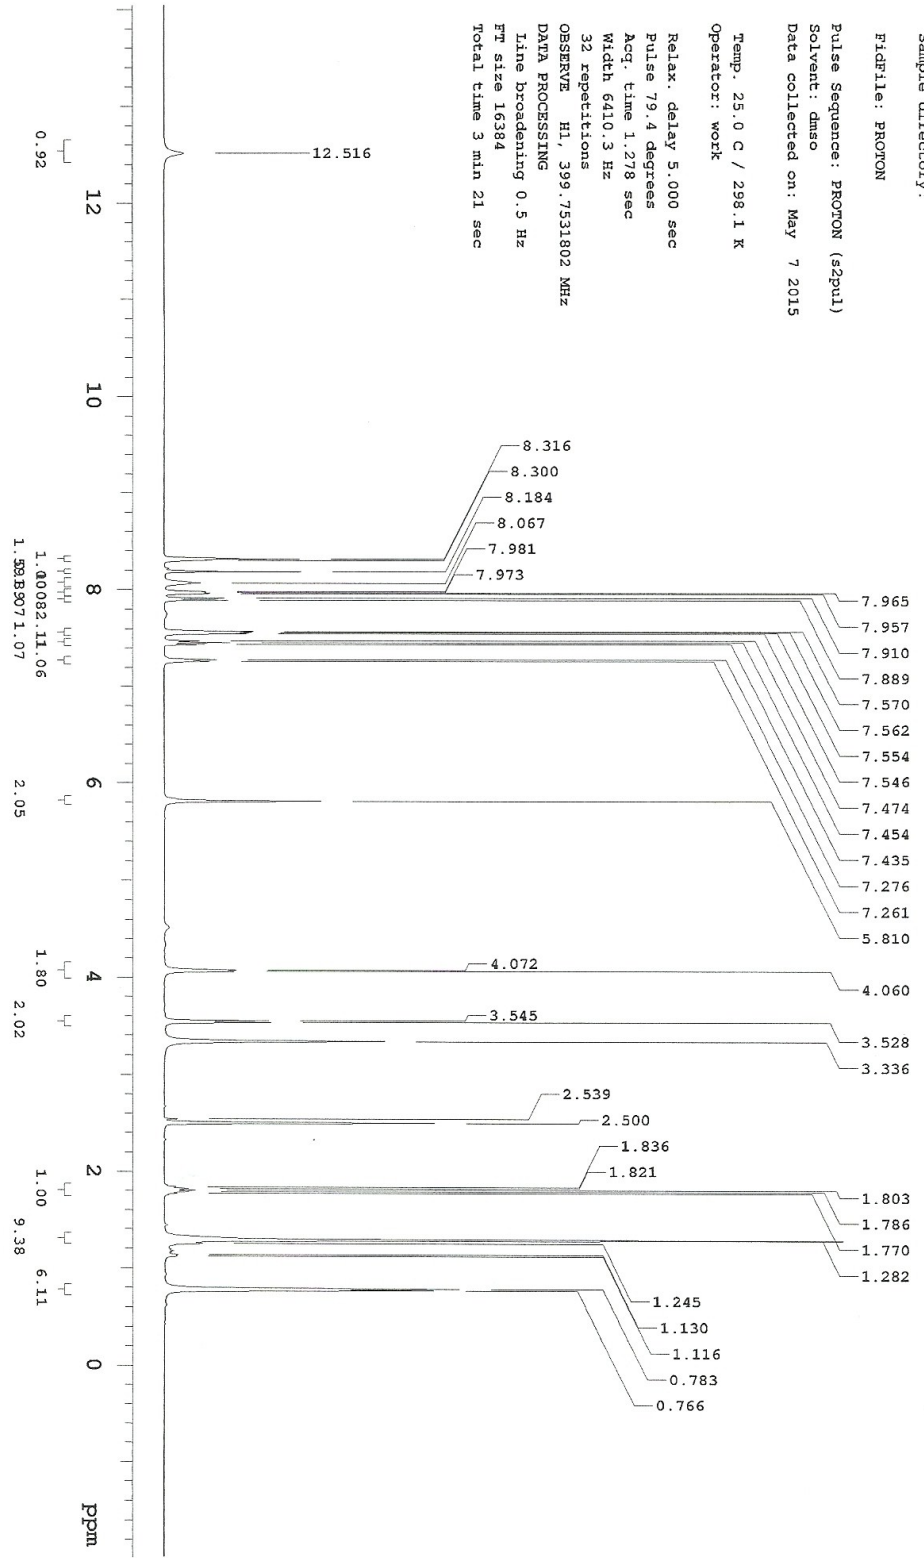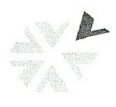

VARIAN

# Compound 5dc <sup>13</sup>C

Sample Name:

Data Collected on:

400mz-vmr3400

Archive directory:

Sample directory:

File: CARBON

Pulse Sequence: CARBON (s2pu1)

Solvent: dmsc

Data collected on: May 7 2015

Temp. 25.0 C / 298.1 K

Operator: work

Relax. delay 1.000 sec

Pulse 58.1 degrees

Acq. time 0.813 sec

Width 24509.8 Hz

500 repetitions

OBSERVE C13, 100.5180202 MHz

DECOUPLE H1, 399.7551914 MHz

Power 39 dB

continuously on

WALTZ-16 modulated

DATA PROCESSING

Line broadening 3.0 Hz

FT size 32768

Total time 15 min

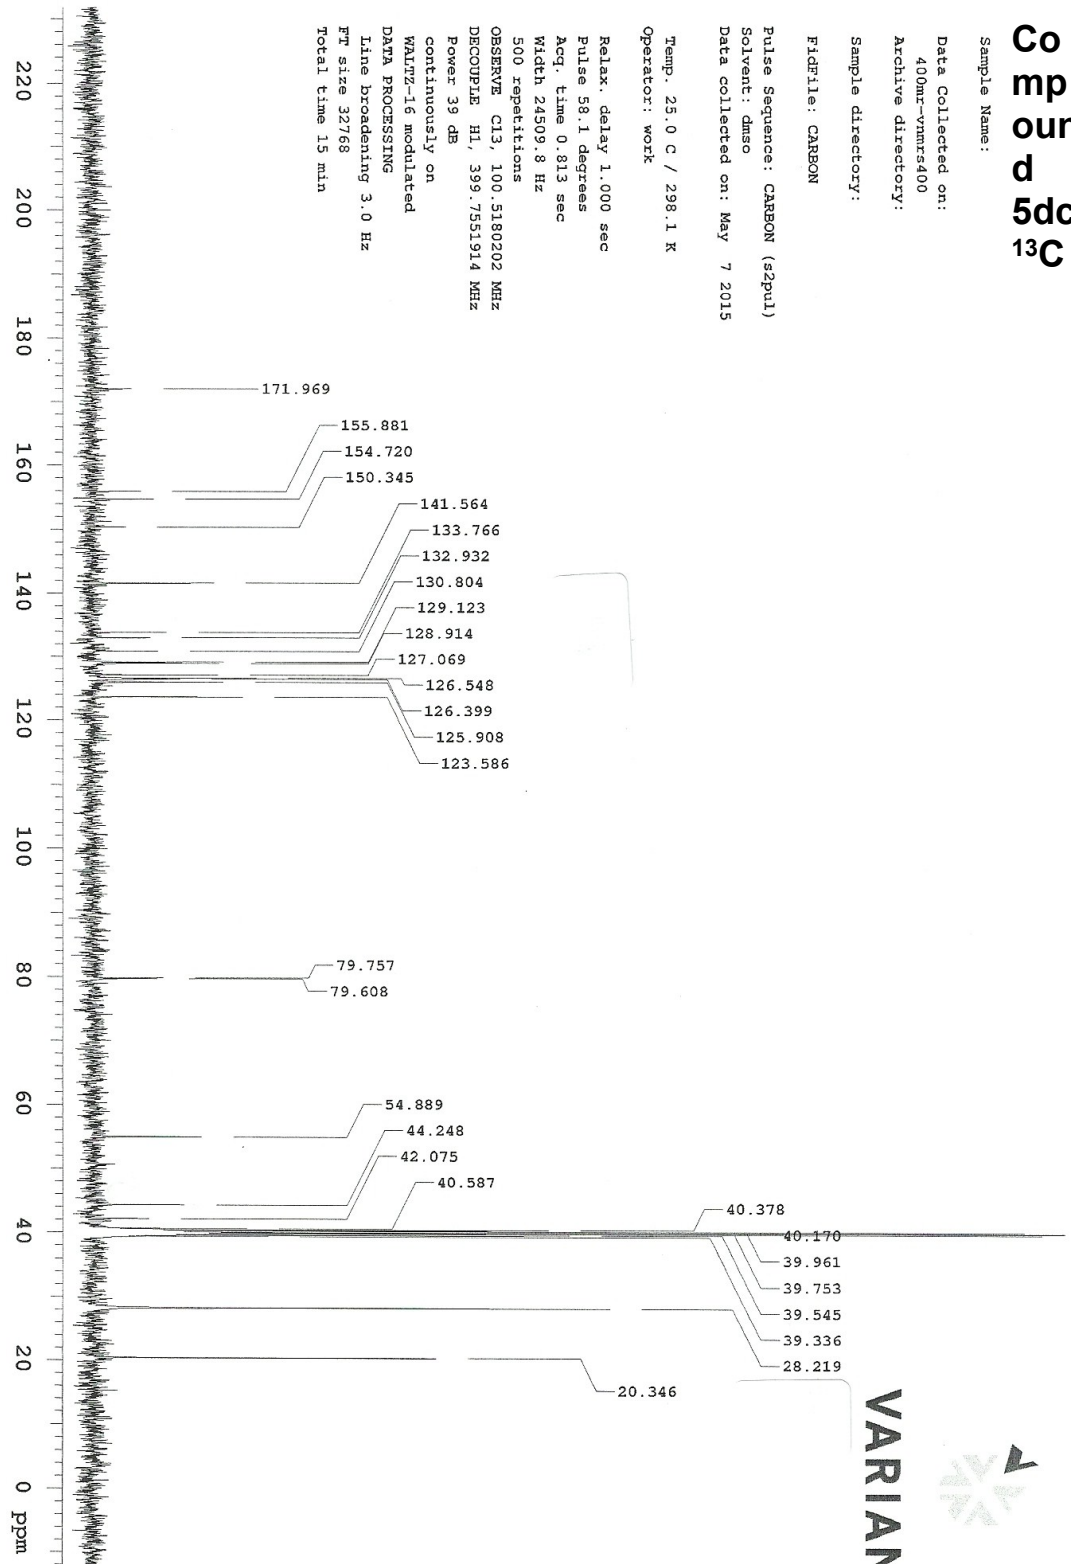

# Compound 6db <sup>1</sup>H

Data Collected on:  
40mr-vnmr400  
Archive directory:

Sample directory:

Filefile: BP-1-037-1H-2

Pulse Sequence: PROTON (s2pu1)  
Solvent: dmsc  
Data collected on: Mar 25 2015

Temp. 25.0 C / 298.1 K

Operator: work

Relax. delay 5.000 sec  
Pulse 79.4 degrees  
Acq. time 1.278 sec  
Width 6410.3 Hz  
32 repetitions  
OBSERVE H1, 399.7531786 MHz  
DATA PROCESSING  
Line broadening 0.5 Hz  
FT size 16384  
Total time 3 min 21 sec

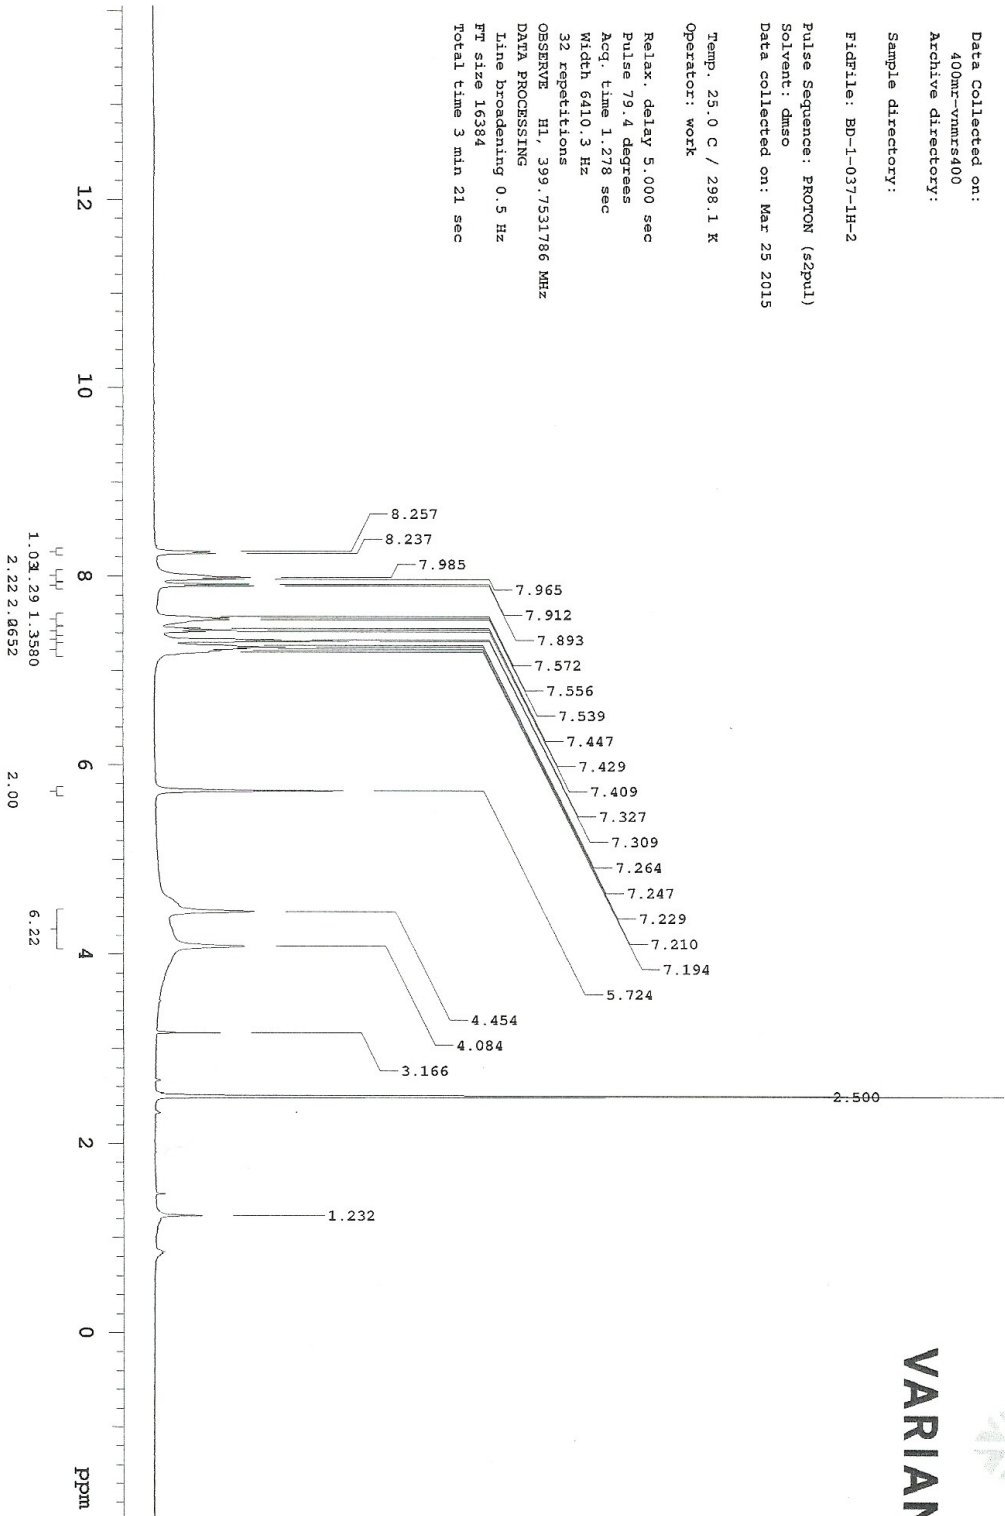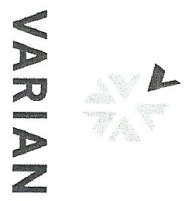

MEI-3-107-13C  
Sample Name:  
Data Collected on:  
400m-vmmr400  
Archive directory:  
Sample directory:  
FIDFile: CARBON  
Pulse Sequence: CARBON (szpul)  
Solvent: dmsc  
Data collected on: May 10 2015  
Temp: 25.0 C / 298.1 K  
Operator: work  
Relax. delay 1.000 sec  
Pulse 58.1 degrees  
Acq. time 0.813 sec  
Width 24509.8 Hz  
1032 repetitions  
OBSERVE C13, 100.5180202 MHz  
DECOUPLE H1, 399.7551914 MHz  
Power 39 dB  
continuously on  
WALTZ-16 modulated  
DATA PROCESSING  
Line broadening 3.0 Hz  
FT size 32768  
Total time 1 hr, 36 min

# Compound 6d b <sup>13</sup>C

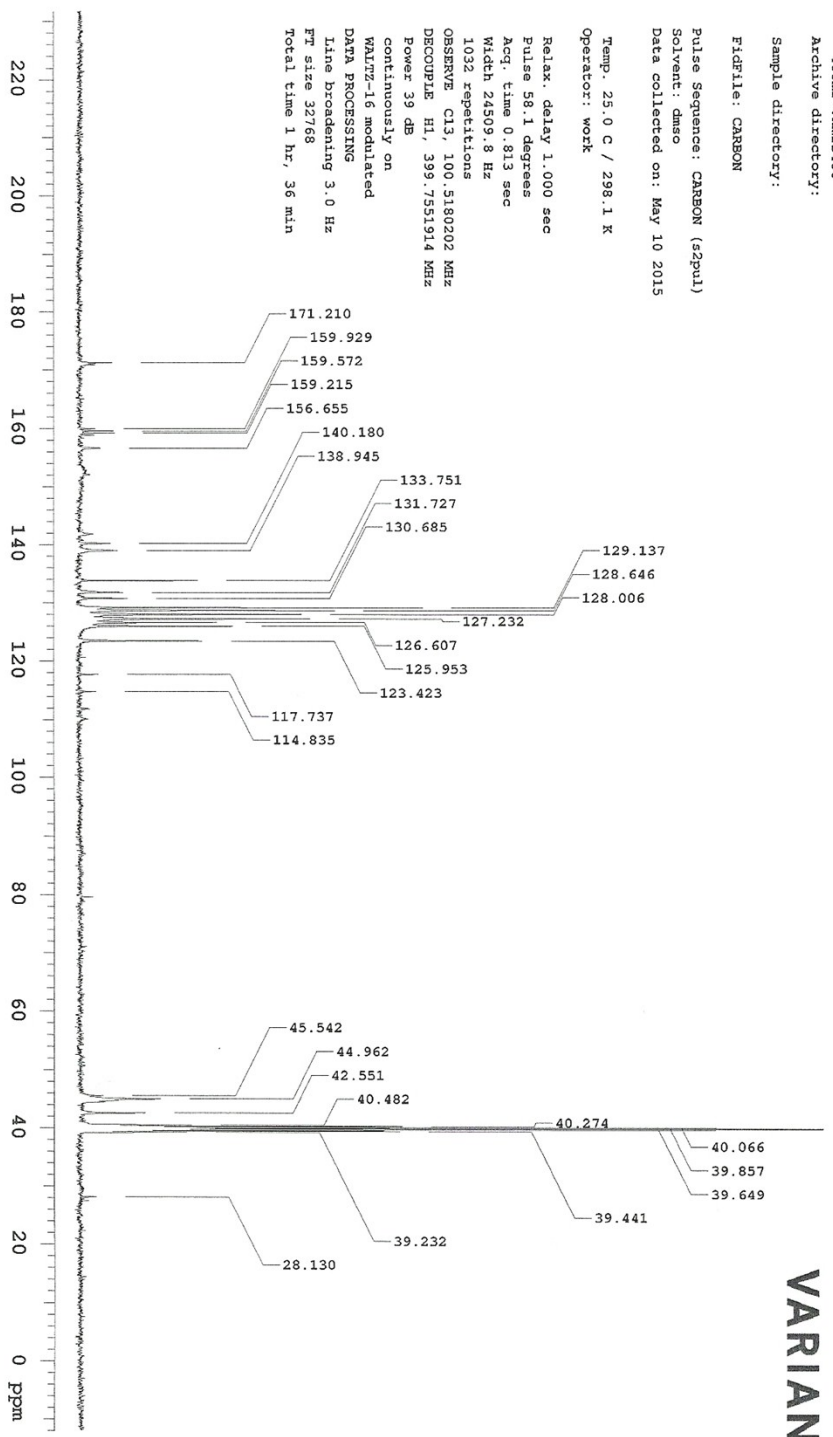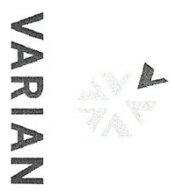

# Compound 7-int <sup>1</sup>H

Archive directory:

Sample directory:

File: SF-235-60C-H1-AXDB-400MHz-040915

Pulse Sequence: s2pul

Solvent: DMSO

Data collected on: Apr 9 2015

Temp. 60.0 C / 333.1 K

Operator: work

VNMR-400 "400mr"

Relax. delay 4.000 sec

Pulse 30.9 degrees

Acq. time 2.505 sec

Width 6387.7 Hz

64 repetitions

OBSERVE H1, 399.7762887 MHz

DATA PROCESSING

Line broadening 0.5 Hz

FT size 65536

Total time 13 min

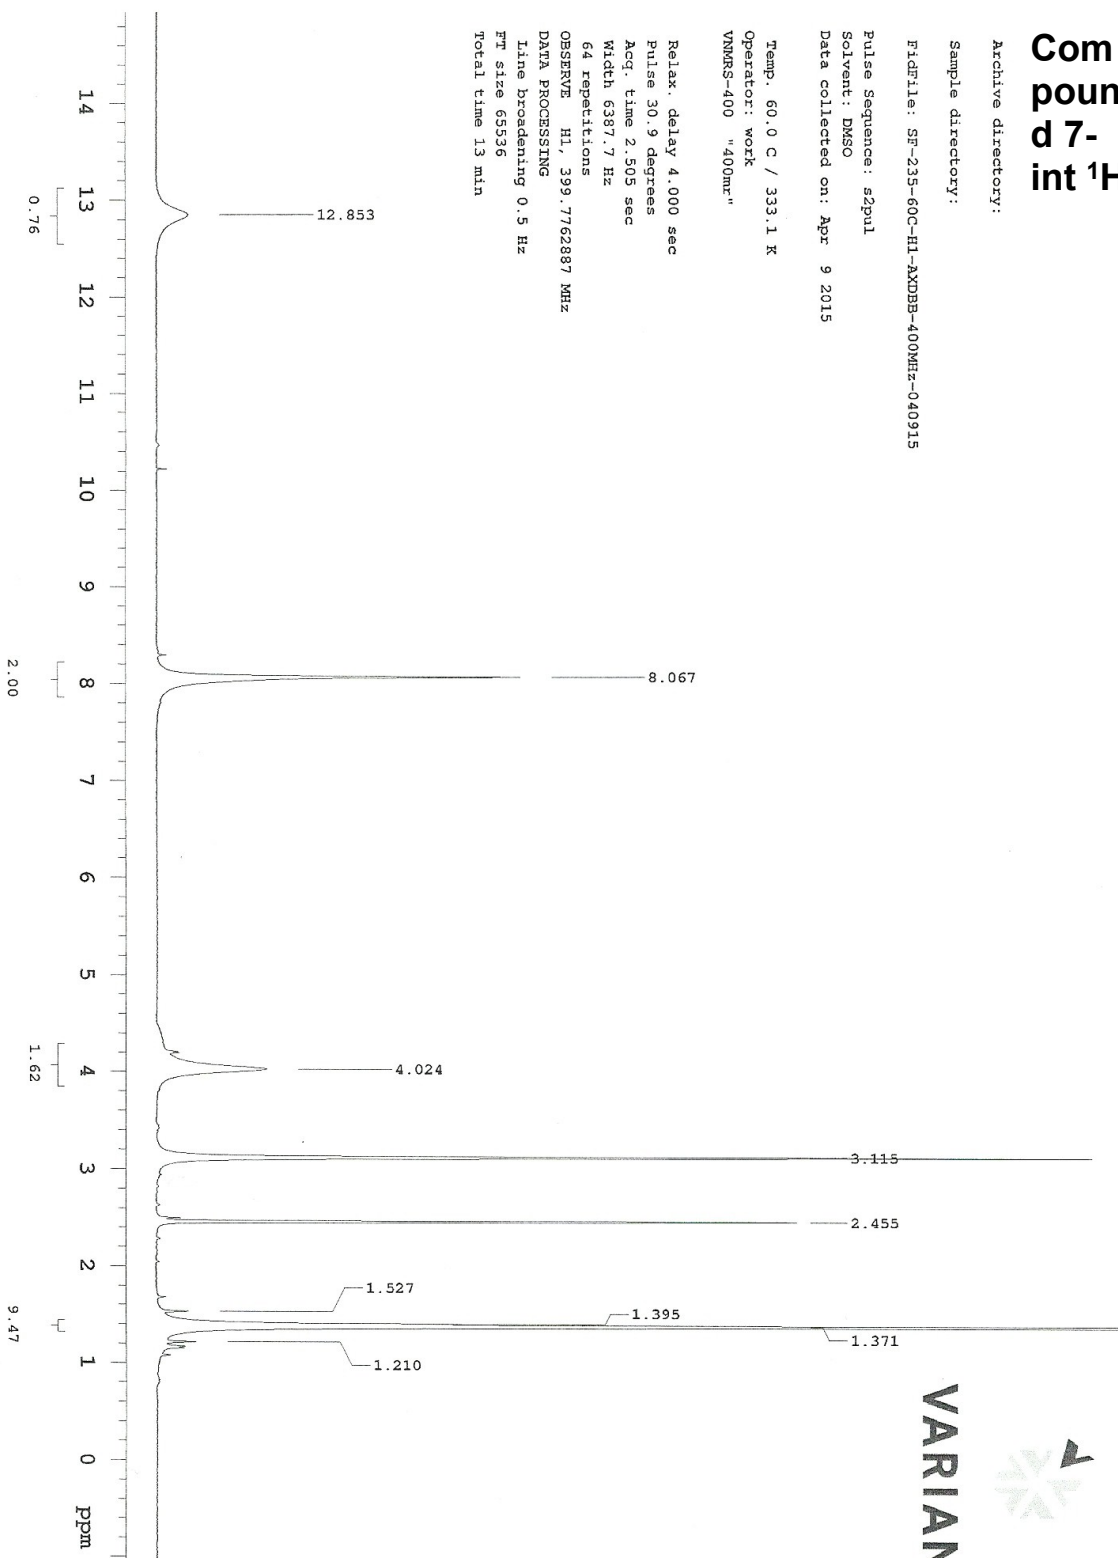



# Compound 7-int <sup>13</sup>C

Data Collected on:  
Agilent-NMR-vnmr5600  
Archive directory:

Sample directory:

File: KH-235-65C-C13-1nmr-042115

Pulse Sequence: CARBON (s2pul)  
Solvent: dmsc  
Data collected on: Apr 21 2015

Temp: 65.0 C / 338.1 K  
Operator: vnmr1

Relax. delay 3.000 sec  
Pulse 45.0 degrees  
Acq. time 0.918 sec  
Width 35714.3 Hz  
16000 repetitions  
OBSERVE C13, 150.7853919 MHz  
DECOUPLE H1, 599.6650334 MHz  
Power 41 dB  
continuously on  
WALTZ-16 modulated  
DATA PROCESSING  
Line broadening 5.0 Hz  
F2 size 131072  
Total time 17 hr, 24 min

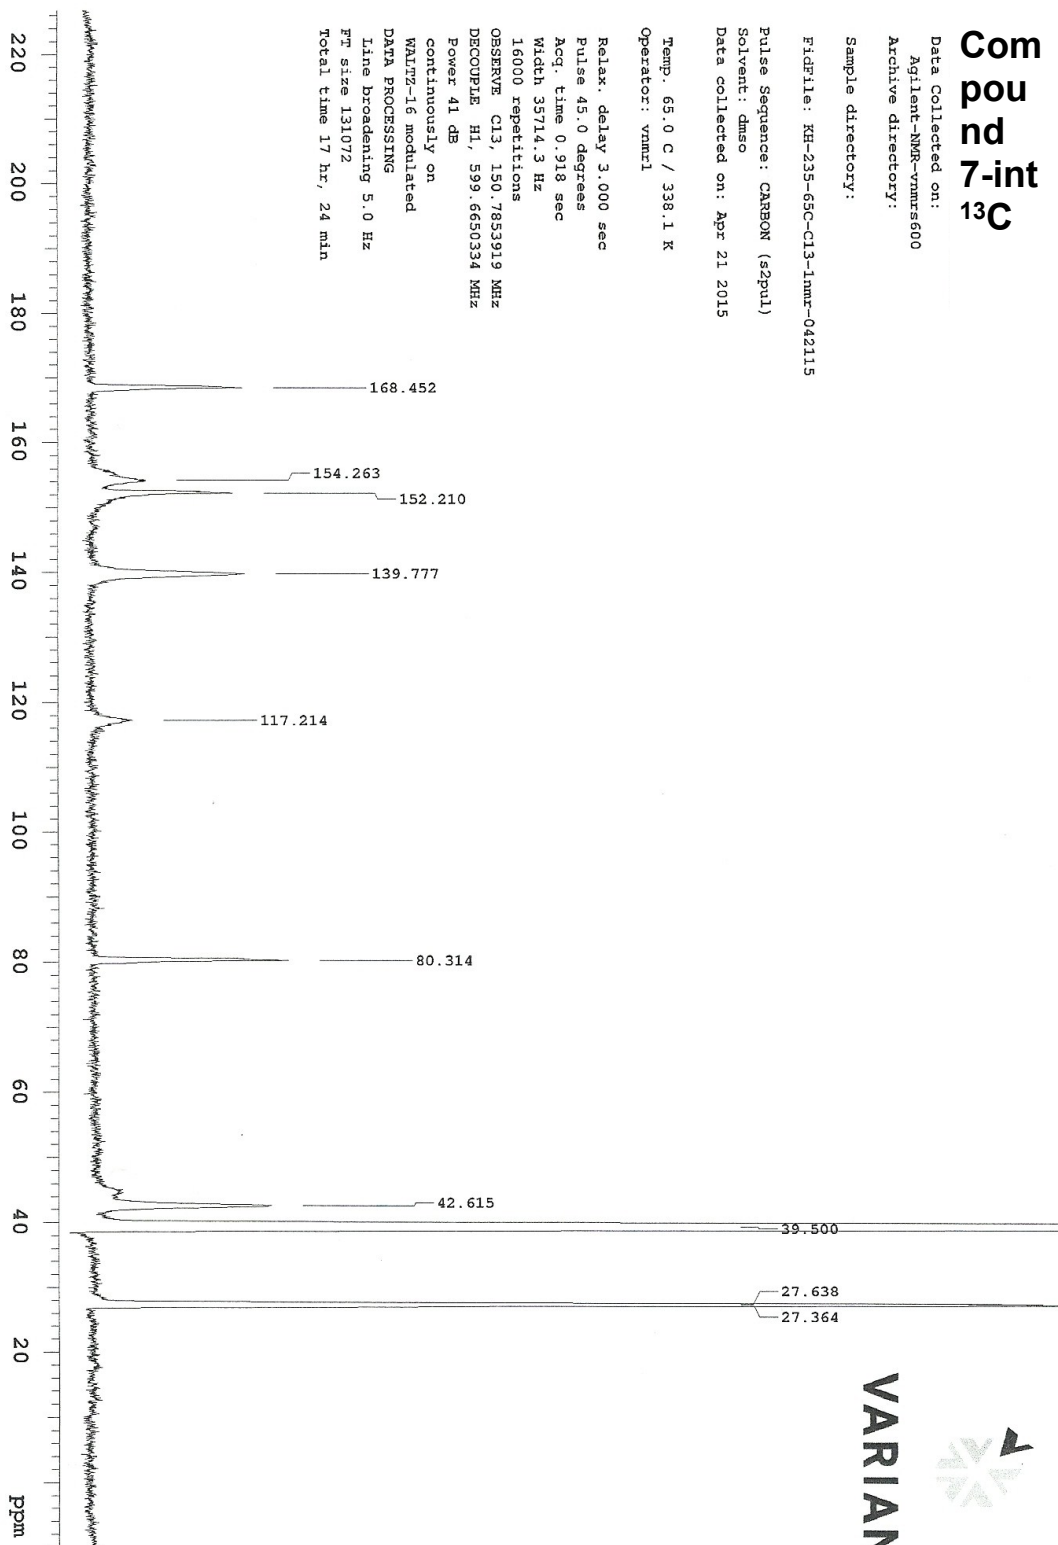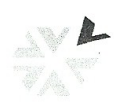

VARIAN

# Compound 7 <sup>1</sup>H

Archive directory:

Sample directory:

File: SF-236-60C-HI-AXDB-400MHz-040915

Pulse Sequence: s2pul

Solvent: DMSO

Data collected on: Apr 9 2015

Temp. 60.0 C / 333.1 K

Operator: work

VMRS-400 "400mr"

Relax. delay 4.000 sec

Pulse 30.9 degrees

Acq. time 2.505 sec

Width 6387.7 Hz

64 repetitions

OBSERVE H1, 399.7762887 MHz

DATA PROCESSING

Line broadening 0.5 Hz

FT size 65536

Total time 6 min 56 sec

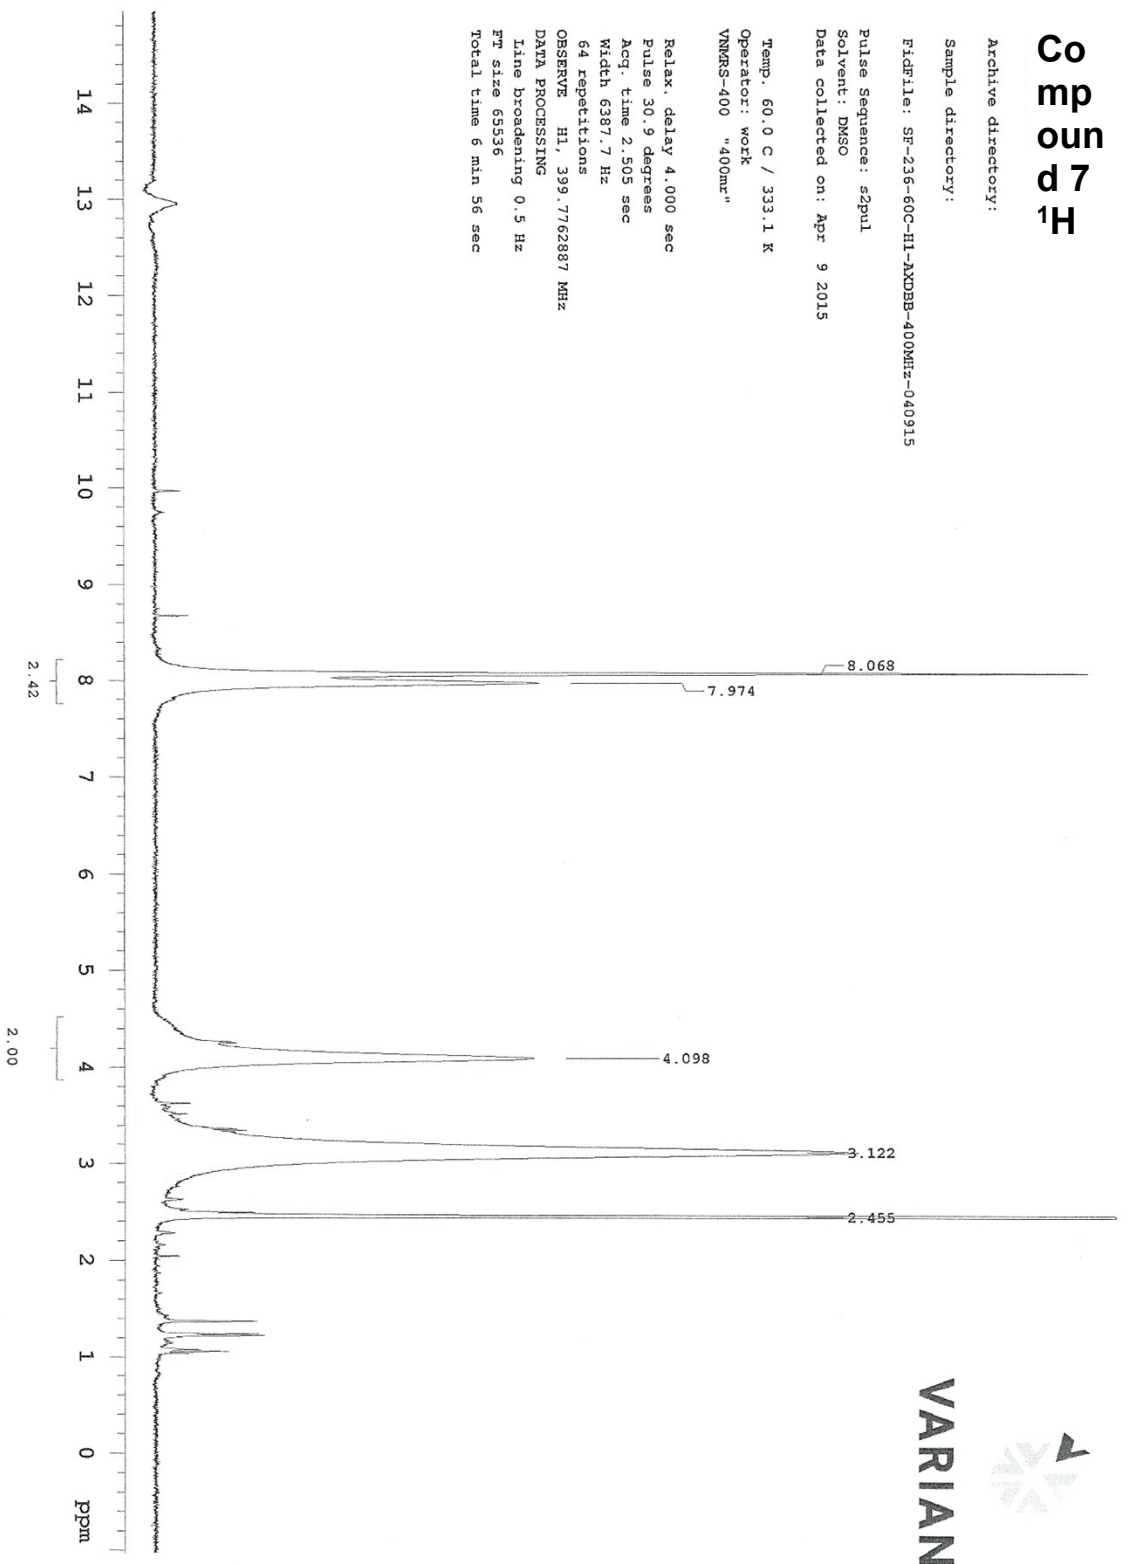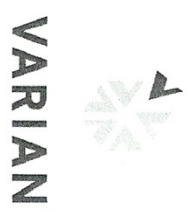

# Compound 7 <sup>13</sup>C

Data Collected on:  
Agilent-NMR-vnmr600  
Archive directory:  
/export/home/chempack/vnmr600/data  
Sample directory:

File: KH-236-C13-65C-1nmr-600MHz-042215

Pulse Sequence: CARBON (s2pul)  
Solvent: dmsc  
Data collected on: Apr 22 2015

Temp: 65.0 C / 338.1 K  
Operator: vnmr1

Relax. delay 0.100 sec  
Pulse 45.0 degrees  
Acq. time 0.865 sec  
Width 37878.8 Hz  
9413 repetitions  
OBSERVE C13, 150.7851387 MHz  
DECOUPLE H1, 599.650334 MHz  
Power 41 dB  
continuously on  
WALTZ-16 modulated  
DATA PROCESSING  
Line broadening 7.0 Hz  
FT size 65536  
Total time 2 hr, 40 min

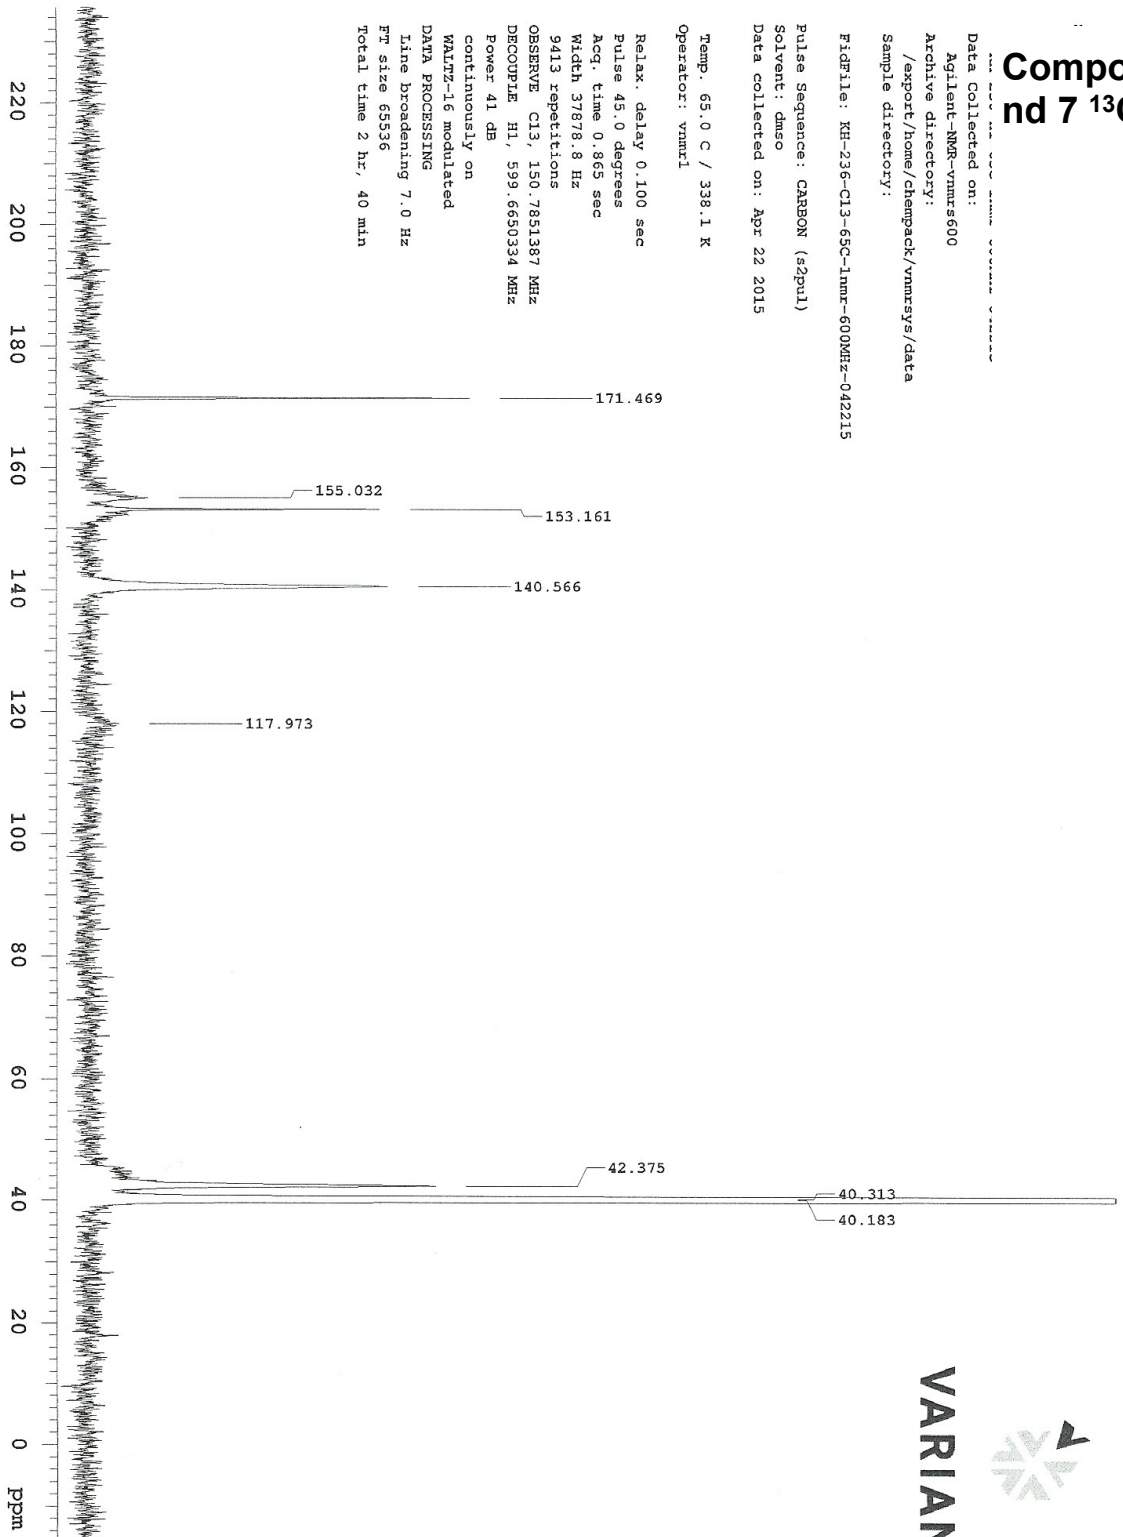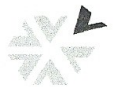

VARIAN
